1 **RetroTest unravels LINE-1 retrotransposition in**  
2 **Head and Neck Squamous Cell Carcinoma**

3

4 Jenifer Brea-Iglesias<sup>1,2#</sup>, Ana Oitabén<sup>1,2#</sup>, Sonia Zumalave<sup>2</sup>, Bernardo Rodriguez-  
5 Martín<sup>2,3</sup>, María Gallardo-Gómez<sup>1</sup>, Martín Santamarina<sup>2</sup>, Ana Pequeño-Valtierra<sup>2</sup>,  
6 Laura Juaneda-Magdalena<sup>1</sup>, Ramón García-Escudero<sup>4</sup>, José Luis López-Cedrún<sup>5</sup>,  
7 Máximo Fraga<sup>6</sup>, José MC Tubio<sup>2</sup>, Mónica Martínez-Fernández<sup>\*1,2</sup>

8 #Equal contribution

9

10 1. Translational Oncology Research Group; Galicia Sur Health Research Institute  
11 (IIS Galicia Sur). SERGAS-UVIGO. Estrada de Clara Campoamor, 341, 36213 Vigo,  
12 (Spain).

13 2. Mobile Genomes Lab. Centre for Research in Molecular Medicine and Chronic  
14 Diseases (CiMUS). (Universidad de Santiago de Compostela). Avda. Barcelona 31,  
15 15706 Santiago de Compostela (Spain).

16 3. Present address: Centre for Genomic Regulation (CRG), The Barcelona Institute  
17 of Science and Technology, Barcelona (Spain). Universitat Pompeu Fabra (UPF),  
18 Barcelona (Spain).

19 4. Molecular and Translational Oncology Division, CIEMAT (ed 70A), Ave  
20 Complutense 40, 28040 Madrid (Spain). Research Institute Hospital 12 de Octubre  
21 (imas12), 28041 Madrid (Spain). Centro de Investigación Biomédica en Red de  
22 Cáncer (CIBERONC), Madrid (Spain).

23 5. Department of Maxillofacial Surgery, University Hospital of A Coruña, As Xubias,  
24 84, 15006 A Coruña (Spain).

NOTE: This preprint reports new research that has not been certified by peer review and should not be used to guide clinical practice.

25 6. Pathological Anatomy. Faculty of Medicine. University Clinical Hospital & Health  
26 Research Institute of Santiago de Compostela (IDIS). Travesa da Choupana s/n,  
27 15706 Santiago de Compostela (Spain).

28

29 **\*Corresponding author:** Monica Martínez Fernández.

30 [monica.martinez@iisgaliciasur.es](mailto:monica.martinez@iisgaliciasur.es) Translational Oncology. Galicia Sur Health

31 Research Institute (IIS Galicia Sur). Hospital Álvaro Cunqueiro. Estrada de Clara

32 Campoamor, 341, 36213 Vigo, (Spain).

33

34

## 35 **Highlights**

36

37 • RetroTest represents the first method to determine LINE-1  
38 retrotransposition from tumor biopsies in real clinical settings.

39 • RetroTest not only offers global LINE-1 retrotransposition ratios but also  
40 identifies the active LINE-1 source elements.

41 • RetroTest elucidates a really early LINE-1 activation in early tumor stages  
42 of Head and Neck Squamous Cell Carcinoma.

43 • Whole Genome Analysis and LINE-1 retrotransposition demonstrates  
44 processes of field cancerization in Head and Neck Squamous Cell  
45 Carcinoma.

46 • LINE-1 retrotransposition favors an earlier and more efficient Head and  
47 Neck Squamous Cell Carcinoma diagnosis.

48

## 49 **Abstract**

50 The relevant role of LINE-1 (L1) retrotransposition in cancer has been recurrently  
51 demonstrated in recent years. However, their repetitive nature hampers their  
52 identification and detection, hence remaining inaccessible for clinical practice.

53 Also, its clinical relevance for cancer patients is still limited. Here, we develop a  
54 new method to quantify L1 activation, called RetroTest, based on targeted

55 sequencing and a sophisticated bioinformatic pipeline, allowing its application in  
56 tumor biopsies. First, we performed the benchmarking of the method and

57 confirmed its high specificity and reliability. Then, we unravel the L1 activation in  
58 HNSCC according to a more extensive cohort including all the HNSCC tumor stages.

59 Our results confirm that RetroTest is remarkably efficient for L1 detection in  
60 tumor biopsies, reaching a high sensitivity and specificity. In addition, L1

61 retrotransposition estimation reveals a surprisingly early activation in HNSCC  
62 progression, contrary to its classical association with advanced tumor stages. This

63 early activation together with the genomic mutational profiling of normal adjacent

64 tissues supports field cancerization process in this tumor. These results underline  
65 the importance of estimating L1 retrotransposition in clinical practice towards an  
66 earlier and more efficient diagnosis in HNSCC.

67

68 **Keywords**

69 Retrotransposition, LINE-1, HNSCC, early diagnosis biomarker, field cancerization

## 70 **1. Introduction**

71 Approximately half of human genome is composed of transposable elements (TEs),  
72 sequences with the ability of moving from one place to another, changing the  
73 normal structure of the genome in the places where they are integrated [1,2].  
74 Among them, long interspersed nuclear element retrotransposons (LINE-1, L1)  
75 represent 17% of the entire DNA content with approximately 500,000 copies, most  
76 of them truncated or inactive [3–6]. Specifically, only a small subset of these L1s is  
77 active in the human genome, although they stay transcriptionally repressed due to  
78 epigenetic mechanisms that prevent the damage that their mobilization would  
79 cause [7]. When this repression is lost, L1 activation can cause different diseases,  
80 including cancer [8, 9].

81 In the framework of the International Consortium of PanCancer (PCAWG), our  
82 previous analyses shown that somatic L1 insertions represent the major  
83 restructuring source of cancer genomes, especially important for head-and-neck  
84 squamous cell carcinoma (HNSCC)[9]. Aberrant L1 retrotransposition contribute  
85 to instability within cancer genomes, promoting cancer-driving rearrangements  
86 that involve the loss of tumor-suppressor genes and/or the amplification of  
87 oncogenes, and favoring some cancer clones to survive and grow [9].

88 Despite this demonstrated impact of L1 activation in cancer genomes, the  
89 repetitive nature of L1 elements and their dispersion along the genome hinder  
90 their real activation estimates in tumor samples, preventing its translation into  
91 patient diagnosis/prognosis. This repetitive nature compels that the majority of  
92 the available detection methods are based on Whole Genome Sequencing (WGS),  
93 unfeasible for most hospitals in their diary practice, or require such good quality

94 DNA input quantities that remain unaffordable for a clinical practice mainly based  
95 on small and degraded tissue biopsies.

96 HNSCC represents the second tumor type with highest L1 activation [9], but the  
97 clinical implications of L1 retrotransposition are still to be elucidated. Head and  
98 Neck Cancer is a heterogeneous group of cancers of which more than 90% are  
99 diagnosed as HNSCC, arising in the stratified epithelium of the oral cavity, pharynx,  
100 and larynx [10,11]. Tumor development is often triggered by chronic exposure to  
101 tobacco or alcohol, while infection with high-risk human papillomaviruses (HPVs)  
102 causes a substantial and rising proportion of these tumors [12]. The lack of  
103 symptoms in the early stages together with the non-existent cancer biomarkers  
104 lead towards most diagnoses at advanced stages, where the 5-year survival rate is  
105 less than 50% [11]. Thus, there is an urgent need to find molecular biomarkers  
106 that can facilitate an earlier diagnosis and increase patients' life expectancy.

107 Based on this, we aimed to unravel the impact of possible L1 activation along  
108 HNSCC development in a clinical setting. First, we have developed a new efficient  
109 method based on L1 transductions, RetroTest, to measure L1 activation even in  
110 biopsies with low DNA inputs. Then, we have evaluated RetroTest sensitivity and  
111 specificity, demonstrating its high values. Finally, we have assessed L1  
112 retrotransposition along different tumor stages, unraveling for the first time a really  
113 early activation in HNSCC and field characterization, arising L1 as a promising  
114 early diagnostic biomarker.

115

116

## 117 **2. Materials and methods**

### 118 *2.1. Patients and tumor samples*

119 Tumor samples and medical records were analyzed in a series of 96 HNSCC  
120 patients of 3 different cohorts (*Complejo Hospitalario Universitario de A Coruña*  
121 (*CHUAC*), *Biobanco Vasco* and *Fundación Pública Galega de Medicina Xenómica*  
122 (*FPGMX*)). The Ethical Committee for Clinical Research of Santiago-Lugo approved  
123 the study (CEIC 2018/567). Fresh-frozen and FFPE HNSCC tissue biopsies were  
124 collected, and characteristics of each tumor are specified in Table 1. The  
125 histopathologic status was confirmed by each corresponding Pathology  
126 Department following the latest TNM guidelines.

127

### 128 *2.2. DNA isolation*

129 Genomic DNA (gDNA) was extracted from fresh-frozen tissue and formalin-fixed  
130 paraffin-embedded (FFPE) samples using AllPrep DNA/RNA and AllPrep FFPE  
131 DNA/RNA Mini Kits (Qiagen), respectively. DNA quantification and integrity were  
132 assessed using Qubit dsDNA BR Assay Kit in Qubit 4.0 (ThermoFisher Scientific)  
133 and a 4200 TapeStation system (Agilent).

134

### 135 *2.3. RetroTest method: design, library construction and target sequencing*

136 During L1 transcription, the processing machinery sometimes bypasses the L1  
137 polyadenylation signal until a second 3' downstream polyadenylation site,  
138 mobilizing unique sequences downstream of the element in a process called *L1 3'*  
139 *transduction*. This process has been reported to occur in around 10% of the L1  
140 mobilizations [7] and can be used as an indirect measurement of real active L1  
141 elements. Accordingly, there are three different types of retrotranspositions: solo-

142 L1 (TD0), when a partial or complete L1 is retrotransposed; partnered  
143 transductions (TD1), in which a L1 and downstream unique sequence are  
144 retrotransposed; and orphan transductions (TD2), in which only the unique  
145 sequence downstream of the active L1 is mobilized without the associated L1 [7].  
146 RetroTest is based on targeted sequencing, where the capture probes are designed  
147 against the unique sequence downstream of the 124 L1 full-length competent  
148 elements previously described [7] using SureSelect design from Agilent. RetroTest  
149 identifies L1 TD2 orphan insertions through the detection of discordant reads and  
150 clipped reads. The main idea behind the method is that discordant read pairs,  
151 where one of the mates is mapped to a L1 3' downstream sequence while the other  
152 is mapped to the insertion target sequence, support an insertion. In addition,  
153 clipped reads, mapped to the target sequence but containing a discordant extreme  
154 blotting to a L1 3' downstream sequence, are detected to identify the breakpoint of  
155 the insertion (Fig. 1A). Here, a minimum size of 2 reads per cluster and a minimum  
156 of 4 supporting reads was specified to call a L1 insertion (Additional file 1).  
157 Target libraries were constructed with SureSelect Target Enrichment System for  
158 Illumina Paired-End Multiplexed Sequencing (Agilent). 100 ng of gDNA from each  
159 sample were sheared using a Covaris M220 Focused-Ultrasonicator (Covaris) and  
160 libraries and capture with targeted RNA baits were performed. The multiplexed  
161 samples were sequenced with Illumina 150bp paired-end.  
162 Sequencing reads were mapped to the hg19 reference genome by Burrows-  
163 Wheeler Aligner BWA-mem [13]. Samtools [14] was used to sort the aligned reads  
164 and to index the obtained bam file, applying Bammarkduplicates2 from Picard  
165 tools [15] to mark duplicated reads.

166



#### 167 *2.4. RetroTest benchmarking*

168 We generated simulated paired-end read datasets using ART [16] and several  
169 commands from MEIGA-MEIsimulator, an in-house bioinformatic tool (Additional  
170 file 1).

171 To mimic the capture process, we selected read pairs with at least one of the mates  
172 mapping on a given set of target regions with Picard FilterSamReads v2.18.14 [15].

173 We used the resulting bam files to assess sensitivity and specificity under different  
174 conditions. To test how our method performs with subclonal events, we simulated  
175 transductions at different VAFs (10%, 20%, 40% and 50%). We also studied how  
176 coverage affects the detection power of our algorithm. Using Picard  
177 DownSampleSam v2.18.14 [15], we subsampled reads from a 150x simulation at  
178 50% VAF under different sequencing depths (15x, 30x, 60x, 90x, 120x and 150x).

179 We compared RetroTest performance with Transposon Finder in Cancer (TraFiC),  
180 used previously to explore somatic retrotransposition in PCAWG [7]. Both were  
181 used to call the simulated events. Precision was calculated dividing the number of  
182 true positive calls by the number of total calls performed by the method. Recall  
183 was calculated dividing the number of true positive calls by the number of total  
184 simulated events. True positives, False positives and False negatives were  
185 identified by intersecting the coordinates of simulated events with the coordinates  
186 of the calls using BEDTools intersect [17]. To compare RetroTest and TraFiC  
187 results, Venn diagrams with the insertions detected by each method were plotted  
188 by using *vennDiagram* R package.

189

#### 190 *2.5. Whole Genome Sequencing and determination of mutation profile.*

191 To obtain WGS data, DNA was sent to an external service (Macrogen). Truseq Nano  
192 DNA Libraries (350bp) were constructed and sequenced in a NovaSeq6000  
193 Illumina platform (150bp paired-end). For a detailed explanation see Additional  
194 File 1.

195

## 196 *2.6. Statistical analyses*

197 The association between L1 transduction rate (corrected by coverage) and patient  
198 clinical features was assessed by multiple linear regressions. Wilcoxon or Fisher  
199 test, depending on sample size, were applied to compare the differences in mean  
200 values for clinical variables. Overall survival (OS), progression free survival (PFS)  
201 and survival probability analyses were performed with the *survminer* and *survival*  
202 R packages, using log-rank test to compare different groups. The association  
203 between survival and clinical variables was evaluated by Cox regression.

204

## 205 *2.7. Enrichment analysis*

206 All enrichment analyses were performed using *enrichR* R package [18]. The  
207 complete list of pathways databases can be found in Additional File 1.

208

209

## 210 **3. Results**

### 211 *3.1. RetroTest Benchmarking*

212 During L1 transcription, transductions are reported to occur in around 10% of the  
213 L1 mobilizations [7], moving also unique sequences downstream of the source  
214 element. RetroTest is designed to capture these mobilized and downstream-  
215 transduced unique sequences from orphan transductions (TD2) and use them as  
216 barcodes (Fig. 1A). These barcodes can identify unequivocally the insertions  
217 caused by these 124 L1 source elements active in cancer [7,9]. With this aim, we  
218 focused RetroTest probe design on the first 5000 nucleotides adjacent to the L1 3'  
219 regions for each of the 124 L1 source elements, since these are the regions most  
220 frequently transduced [7]. Since RetroTest uses transductions as an indirect  
221 measure of real L1 activation, we first compared L1 activation *versus* TD2 using the  
222 whole PCAWG data. In this way, we confirmed a high and statistically significant  
223 correlation between both events ( $r=0.88$ ,  $p=2.2e^{-16}$ ), and a relation of 1:10 as  
224 previously described (Fig. 1B).

225 Next, we optimized the lab protocol for both FFPE and fresh-frozen tissues and  
226 developed an associated bioinformatic pipeline. We evaluated the performance  
227 and accuracy of RetroTest in detecting L1 activation by generating an artificial  
228 cancer genome. In this genome, we have randomly distributed a total of 2480 L1  
229 transductions. Using simulations, we assessed the performance of RetroTest for  
230 different sequencing depth: 15x, 30x, 60x, 90x, 120x and 150x. RetroTest obtained  
231 a precision around 0.99 in all cases and a recall around 0.96 (Fig. 1C). We also  
232 evaluated the variation of the performance depending on the variant allele  
233 frequency (VAF) of the integrations, precisely for the following VAFs: 10%, 20%,  
234 40% and 50%. In this case, RetroTest obtained a precision around 1, decreasing

235 for lower VAFs, and a recall ranged from 0.81 to 0.96, augmenting as increasing the  
236 VAF (Fig. 1D).

237 Then, we compared RetroTest and the classical TraFiC, used for WGS in PCAWG  
238 [7]. As TraFiC is designed to work only with standard WGS 30x data, we compared  
239 the analysis varying exclusively the VAFs. TraFiC precision ranged from 0.99 to  
240 0.88 and recall ranged from 0.11 to 0.87 as VAF increased (although the maximum  
241 recall was obtained for VAFs of 40%, being 0.87) (Fig. 1E) (Additional File 2: Table  
242 S1). We compared the performance of both methods by intersecting both calls in  
243 the mock tumor genome. Using a VAF of 50%, most of the variants were called by  
244 both methods, concretely 2216 variants, while RetroTest exclusively called 167,  
245 and TraFiC 33 private events, most of them resulting in false positives according to  
246 IGV (Fig. 1F).

247

### 248 *3.2. L1 activation in HNSCC*

249 Once confirmed the accuracy and precision of RetroTest, we decided to apply it to  
250 a more extensive HNSCC cohort, composed of 96 tumors along the tumor stages,  
251 from T1 to T4 (Table 1). We detected L1 activation in 75% of the patients (Fig. 2A),  
252 out of which 48.6% showed high activity (beyond the median) (Table 2). When the  
253 activation was studied along the different tumor stages of the disease, advanced  
254 disease (T3-T4) showed statistically higher L1 activation compared with early  
255 stages (T1-T2) ( $p=0.0072$ ) (Fig. 2B). Following tumor staging, L1 activation was  
256 detected in 62.5% of T1 tumors, 63.1% of T2 tumors, 94.4% of T3 tumors, and  
257 73.5% of the tumors in T4 (Table 2). The detection of L1 activation in all the tumor  
258 stages among the different patients, even in the first stage of the disease (T1),  
259 supports an early L1 activation during tumor progression.

260 Then, we analyzed L1 activation considering different patients' clinical  
261 characteristics, finding no statistically significant association between the L1  
262 activation and alcohol consumption ( $p=0.14$ ) or sex ( $p=0.055$ ). Interestingly,  
263 smoker patients showed statistically significantly higher L1 activity than non-  
264 smokers ( $p=0.0015$ ) (Fig. 2C). We did not find an association between L1  
265 activation and survival probability ( $p=0.59$  active vs. inactive,  $p=0.49$  high vs. low  
266 rate) (Additional File 3: Fig. S1), although when considering those T1 patients who  
267 have L1 already active at early stages, Kaplan-Meier curve showed that they tend  
268 to have a lower survival probability, not being statistically significant ( $p=0.43$ )  
269 (Fig. 2D).

270 Finally, in addition to localizing the position of each transduction, RetroTest can  
271 also identify the source L1 element that has been mobilized. Thus, we have  
272 detected L1 transductions in 23 genes throughout 27 patients. As shown in Fig. 2E,  
273 most of these insertions are caused by a few source elements that resulted very  
274 active in HNSCC, especially the 22q12.1.

275

### 276 *3.3. HNSCC mutation profile and L1 activation*

277 To further characterize the molecular profile of L1 activation in our HNSCC cohort,  
278 we obtained WGS data from 19 tumor samples from patients measured by  
279 RetroTest. To detect only somatic variation, their corresponding paired-normal  
280 samples were included as germline control. We detected a median of 40 single  
281 nucleotide variants (SNVs) and INDELS, identifying a total of 1012 somatic variants  
282 throughout the cohort, affecting 918 genes (Additional File 2: Table S2). As shown  
283 in Fig. 3A, we did not detect a correlation between L1 activation and the general  
284 tumor mutation burden (TMB). Our results showed that the most frequently

285 mutated gene was *TP53* (36.8%), followed by *NOTCH1* (26.3%), *MT-ND5* (26.3%),  
286 *FAT1*, and *GRIN2A* (21.1%). Interestingly, we found that most of the patients with  
287 *TP53* mutations showed also high L1 activity (71.4%). In fact, when we compared  
288 the L1 activation with the *TP53* mutation, we found a clear association ( $p=0.056$ )  
289 (Fig. 3B). Enrichment analyses with the mutated genes showed involved key  
290 processes for cancer progression such as *Notch signaling*, *TGF $\beta$  signaling*, and  
291 again *p53 activity regulation* (Fig. 3C) (Additional File 2: Table S3). CHEA analysis  
292 revealed the alteration of transcription factors related to epigenetic mechanisms  
293 including Polycomb members (*EZH2*, *SUZ12*) (Fig. 3D) (Additional File 2: Table S4).  
294

#### 295 3.4. Profiling normal adjacent tissues to the HNSCC tumor (NAT)

296 To further understand the early HNSCC features, we decided to evaluate a possible  
297 field cancerization process, in which the normal cell population is replaced by  
298 cancer-primed cells, without anatomical or morphological changes, but being  
299 already premalignant at molecular level. To this, we analyzed the available normal  
300 samples obtained from adjacent tissues to the tumor and the peripheral blood  
301 mononuclear cells (PBMCs), used as germline control (Fig. 4A). We detected a total  
302 of 25 high impact and/or possibly pathogenic somatic variants affecting the NAT  
303 (Additional File 2: Table S5). Most of these specific mutations ( $n=20$ ; 80%) were  
304 exclusive from NAT tissue, including those affecting key genes such as *NOTCH1*  
305 (the most mutated gene), *FAT1* or *PPARD*; while 20% were shared between NAT  
306 and tumor tissue, affecting genes such as *CDKN2A*.

307 To elucidate whether L1 further supports field cancerization, we evaluated the  
308 NAT of a total of 9 patients by RetroTest. We compared the L1 elements active in  
309 the tumor, in the NAT, and in their corresponding paired germline. In this way, we

310 could confirm that most of the L1 activation was present only in the tumor, 5  
311 insertions resulted germline, and 1 element appeared active and shared by tumor  
312 and NAT. Surprisingly, 4 insertions appeared exclusively in NAT (Fig. 4B). Thus, we  
313 could confirm field cancerization and demonstrate that L1 is already active in NAT,  
314 supporting once again its early activation in HNSCC.

315

#### 316 **4. Discussion**

317 Since the recently demonstrated high impact of L1 in cancer genomes [7,9], L1 has  
318 been evaluated as a cancer biomarker in different studies assessing its activity by  
319 evaluating L1 methylation, RNA expression, or protein levels [19–22]. However,  
320 most of L1 genome sequences are truncated and not functional, so results can  
321 present important biases in their L1 estimations, while its translation into clinical  
322 routine can be challenging due to RNA/protein instability. Previous proposed  
323 technologies based on DNA full-length L1 retrotransposon capture sequencing,  
324 such as RC-seq [23], present the associated possible bias of the real L1 activation,  
325 besides only offer global L1 estimates, and important DNA requirements (2.5µg  
326 starting genomic DNA), unaffordable for clinical practice. The most recent  
327 approaches are based on the identification of L1 insertions as real L1 activation  
328 measure (TraFiC [7], xTea [24], MELT [25] and Mobster [26]). They use Whole  
329 Genome or Whole Exome Sequencing from Illumina pair-end short reads,  
330 nevertheless, short reads hamper the detection of transposable elements  
331 insertions in highly repetitive or complex rearrangement regions. Additionally,  
332 these high throughput approaches are not affordable for most of the hospitals.  
333 More recently, long reads sequencing has arisen as a new possibility (xTea [24],  
334 PALMER [27]), but again their requirements of huge amounts of high-quality DNA

335 remain unaffordable for biopsies mainly composed of small samples and  
336 fragmented DNA. Thus, incorporating L1 activation into the clinical practice  
337 requires new methods supported by standardization and rigorous validation to  
338 demonstrate its utility.

339 Here, we present RetroTest: a new method to detect real L1 activation in clinical  
340 samples with low DNA input requirements, both from fresh/frozen or FFPE  
341 biopsies. Its novelty and power lie in the targeted detection of active source L1  
342 elements, which showed a highly and direct statistical correlation with total L1  
343 activity (as demonstrated by our data) in a more cost-effective than previously  
344 proposed approaches. Our method not only offers global L1 estimates but also  
345 identifies the L1 elements active in each real sample. Our benchmarking supports  
346 the high precision (1) and recall of RetroTest (0.81-0.96), improving according to  
347 coverage, even reaching the possibility of detecting subclonal insertions. The high  
348 coincidence in the variants called by TraFic and RetroTest, in both simulations and  
349 real-world data, supports the high potential for this new methodology.

350 L1 somatic retrotransposition was previously demonstrated as the second most  
351 frequent type of structural variants among HNSCC genomes [9]. Accordingly, our  
352 results demonstrate that most HNSCC patients (75%) present L1 activation, even  
353 near half of them with high levels (49%). The activation was higher in late stages,  
354 as found in Barret's esophagus, where lower L1 activity was detected in the early  
355 stages increasing with cancer progression [28]. Interestingly, we found a  
356 surprisingly early activation already in the first stages of HNSCC, with activation of  
357 L1 in 62-63% of the T1 patients. These data pointed towards L1 activation as an  
358 early event in the configuration of HNSCC genomes and, thus, in the development



359 of the disease. In fact, those stage T1 patients with L1 activation tended to present  
360 a lower OS.

361 We found an association between high L1 activity and smoking habits. Previous  
362 studies had reported higher hypomethylation rates of L1 in smokers [29], even in  
363 non-cancerous epithelial tissues [30]. Considering that around 75% of HNSCC are  
364 associated with tobacco [31], this mechanism could be responsible for the high L1  
365 activity levels in HNSCC, since methylation is one of the best-demonstrated  
366 mechanisms preventing L1 reactivation [7,32]. In fact, L1 hypomethylation has  
367 been associated with worse prognosis in HNSCC, including a higher risk of relapse  
368 [33–35]. This hypomethylation has been found as an early event in CRC, gastric  
369 and oral cancer [36–39]. Interestingly, it was reported that L1 methylation levels  
370 were significantly lower in oral premalignant lesions of patients who then  
371 developed oral cancer [39].

372 The source element L1 most active in our cohort was that at 22q12.1, coincident  
373 with our previous results [7, 10]. This L1 is located antisense to an intron of the  
374 TTC28 gene and has been also recently identified as the intact LINE-1 mRNA most  
375 highly expressed in breast, ovarian and colon cancer [40], and the L1 element  
376 accounting for most transductions in colorectal cancer [33], supporting the same  
377 hottest activity in HNSCC.

378 Our WGS analyses confirmed no correlation between L1 activity and TMB, but an  
379 association between *TP53* mutation and L1 activation, in line with previous studies  
380 suggesting that *TP53* can repress L1 mobilization [9,40–43]. We also identified an  
381 important epigenetic regulation among the transcription factors strongly  
382 interacting with the mutated genes, specially related to repressive complex  
383 Polycomb. Intriguingly, Mangoni et al. have just deciphered that L1 RNAs can act as

384 long non-coding RNAs and directly interact with the Polycomb during brain  
385 development and evolution [44]. We also reported previously that Polycomb could  
386 regulate lncRNA *HOTAIR* in bladder cancer [45]. In the same sense, Ishak et al.  
387 demonstrated an EZH2-dependent silencing of genomic repeat sequences,  
388 including L1 elements [46]. Therefore, additional analyses would be required to  
389 further address if this epigenetic network plays a role in cancer genome  
390 reorganization.

391 Then, to evaluate possible HNSCC early diagnosis potential biomarkers is  
392 fundamental to get insights into the transition from pre-tumoral to cancer disease.  
393 Thus, we evaluated the presence of field cancerization and identified genetic  
394 features that can eventually lead to cancer development [47], finding exclusive  
395 somatic mutations in the NAT and a small proportion shared with the tumor.  
396 Several studies have recently described patchworks of different clones in normal  
397 tissues, some of them even bearing driver mutations, increasing with age or  
398 smoking habits [48–50]. We found *NOTCH1* and *FAT1* as the most mutated genes,  
399 as Martincorena's results in normal skin and esophagus [48,51]. These genes  
400 showed also high mutation rates in the tumor, indicating the presence of a  
401 precancerous or cancer invasion field.

402 Finally, when we evaluated L1 activity, several mobilizations were exclusively  
403 found in NAT, and only one appeared shared with the tumor, again supporting a  
404 cancerization field. Somatic L1 retrotransposition events have been recently  
405 described in normal urothelium and colorectal epithelium, although with much  
406 lower rates than in bladder and colorectal cancer [52,53]. L1 activity has been also  
407 described in a few pre-tumor samples including Barrett's esophagus and colorectal  
408 adenomas [8,28,54]. Therefore, L1 activation arises as a reinforced early event,

409 even in pre-tumor stages, in the natural history of HNSCC, with the associated  
410 potential of L1 as a field cancerization biomarker.

411

## 412 **Conclusions**

413 We present the development and benchmarking of RetroTest, which allows an  
414 easy measurement of real L1 activation from small tumor biopsies with high  
415 efficacy, favoring its implementation in real clinical settings. RetroTest revealed  
416 that most of the HNSCC patients present L1 activation, associated with smoking  
417 habits and already active in early stages of the disease and NAT, supporting a field  
418 cancerization process and its potential as early diagnostic biomarker.

419

## 420 **Acknowledgements**

421 Authors thank all the enrolled patients and their families. This research project  
422 was made possible through the access granted by the Galician Supercomputing  
423 Center (CESGA) to its supercomputing infrastructure. The supercomputer  
424 FinisTerrae III and its permanent data storage system have been funded by the  
425 Spanish Ministry of Science and Innovation, the Galician Government and the  
426 European Regional Development Fund (ERDF).

427 This work was supported by the Instituto de Salud Carlos III (ISCIII) and the  
428 European Social Fund (“Investing in your future”) (PI19/01113, and partially  
429 by P121/00208, co-funded by FEDER and the European Union), and the Spanish  
430 Association Against Cancer Scientific Foundation (IDEAS19122MART). A.O. was  
431 supported by a predoctoral fellowship from the Galician Innovation Agency, Xunta  
432 de Galicia (ED481A-2020/214). M.M.-F. and J.B. were previously supported by the  
433 Spanish Association Against Cancer Scientific Foundation (INVES207MART and

434 PRDCR19007BREA\_001, respectively). M.M.-F. is currently supported by the  
435 Miguel Servet program (CP20/00188) from the Instituto de Salud Carlos III (ISCIII)  
436 and the European Social Fund (“Investing in your future”). M.G.-G. is supported by a  
437 postdoctoral fellowship from the Galician Innovation Agency, Xunta de Galicia  
438 (IN606B-2024/014).

439

#### 440 **Ethics statement**

441 The Ethical Committee for Clinical Research of Santiago-Lugo gave ethical approval  
442 for this work (CEIC 2018/567).

443

#### 444 **Competing interests**

445 The authors declare no competing interests.

446

#### 447 **Consent for publication**

448 All authors give consent for the publication of this manuscript.

449

#### 450 **Data availability statement**

451 Whole Genome Sequencing data from the HNSCC cohort is deposited into the  
452 Sequence Read Archive (SRA) repository under the following BioProject ID:  
453 PRJNA1053897. RetroTest pipeline is publicly available at  
454 <https://gitlab.com/mobilegenomesgroup/RETROTEST>.

455

#### 456 **CRedit authorship contribution statement**

457 **Jenifer Brea-Iglesias and Ana Oitabén:** Conceptualization, Methodology,  
458 Software, Data curation, Investigation, Validation, Visualization, Writing – review

459 and editing. **Sonia Zumalave:** Conceptualization, Investigation, Methodology,  
460 Software, Validation, Writing – review and editing. **Bernardo Rodríguez-Martin:**  
461 Conceptualization, Methodology, Software. **María Gallardo-Gómez:**  
462 Conceptualization, Visualization, Writing – review and editing. **Martin**  
463 **Santamarina:** Methodology, Validation. **Ana Pequeño-Valtierra:**  
464 Conceptualization, Investigation. **Laura Juaneda-Magdalena:** Methodology,  
465 Conceptualization, Writing - review and editing. **Ramón García-Escudero:**  
466 Methodology, Writing - review and editing. **Jose Luis López-Cedrún:**  
467 Methodology. **Máximo Fraga:** Funding acquisition. **José MC Tubio:**  
468 Conceptualization, Funding acquisition. **Mónica Martínez-Fernández:** Writing –  
469 review & editing, Writing – original draft, Supervision, Resources, Investigation,  
470 Project administration, Funding acquisition, Conceptualization. All authors  
471 approved the final version.

472

## 473 **References**

- 474 [1] H.H. Kazazian, J. V. Moran, The impact of L1 retrotransposons on the human  
475 genome, *Nat. Genet.* 19 (1998) 19–24. <https://doi.org/10.1038/NG0598-19>.
- 476 [2] E.S. Lander, L.M. Linton, B. Birren, C. Nusbaum, M.C. Zody, J. Baldwin, K.  
477 Devon, K. Dewar, M. Doyle, W. Fitzhugh, R. Funke, D. Gage, K. Harris, A.  
478 Heaford, J. Howland, L. Kann, J. Lehoczky, R. Levine, P. McEwan, K.  
479 McKernan, J. Meldrim, J.P. Mesirov, C. Miranda, W. Morris, J. Naylor, C.  
480 Raymond, M. Rosetti, R. Santos, A. Sheridan, C. Sougnez, N. Stange-Thomann,  
481 N. Stojanovic, A. Subramanian, D. Wyman, J. Rogers, J. Sulston, R. Ainscough,  
482 S. Beck, D. Bentley, J. Burton, C. Clee, N. Carter, A. Coulson, R. Deadman, P.  
483 Deloukas, A. Dunham, I. Dunham, R. Durbin, L. French, D. Grafham, S.

484 Gregory, T. Hubbard, S. Humphray, A. Hunt, M. Jones, C. Lloyd, A. McMurray,  
485 L. Matthews, S. Mercer, S. Milne, J.C. Mullikin, A. Mungall, R. Plumb, M. Ross,  
486 R. Shownkeen, S. Sims, R.H. Waterston, R.K. Wilson, L.W. Hillier, J.D.  
487 McPherson, M.A. Marra, E.R. Mardis, L.A. Fulton, A.T. Chinwalla, K.H. Pepin,  
488 W.R. Gish, S.L. Chissoe, M.C. Wendl, K.D. Delehaunty, T.L. Miner, A.  
489 Delehaunty, J.B. Kramer, L.L. Cook, R.S. Fulton, D.L. Johnson, P.J. Minx, S.W.  
490 Clifton, T. Hawkins, E. Branscomb, P. Predki, P. Richardson, S. Wenning, T.  
491 Slezak, N. Doggett, J.F. Cheng, A. Olsen, S. Lucas, C. Elkin, E. Uberbacher, M.  
492 Frazier, R.A. Gibbs, D.M. Muzny, S.E. Scherer, J.B. Bouck, E.J. Sodergren, K.C.  
493 Worley, C.M. Rives, J.H. Gorrell, M.L. Metzker, S.L. Naylor, R.S. Kucherlapati,  
494 D.L. Nelson, G.M. Weinstock, Y. Sakaki, A. Fujiyama, M. Hattori, T. Yada, A.  
495 Toyoda, T. Itoh, C. Kawagoe, H. Watanabe, Y. Totoki, T. Taylor, J.  
496 Weissenbach, R. Heilig, W. Saurin, F. Artiguenave, P. Brottier, T. Bruls, E.  
497 Pelletier, C. Robert, P. Wincker, A. Rosenthal, M. Platzer, G. Nyakatura, S.  
498 Taudien, A. Rump, D.R. Smith, L. Doucette-Stamm, M. Rubenfield, K.  
499 Weinstock, M.L. Hong, J. Dubois, H. Yang, J. Yu, J. Wang, G. Huang, J. Gu, L.  
500 Hood, L. Rowen, A. Madan, S. Qin, R.W. Davis, N.A. Federspiel, A.P. Abola, M.J.  
501 Proctor, B.A. Roe, F. Chen, H. Pan, J. Ramser, H. Lehrach, R. Reinhardt, W.R.  
502 McCombie, M. De La Bastide, N. Dedhia, H. Blöcker, K. Hornischer, G.  
503 Nordsiek, R. Agarwala, L. Aravind, J.A. Bailey, A. Bateman, S. Batzoglou, E.  
504 Birney, P. Bork, D.G. Brown, C.B. Burge, L. Cerutti, H.C. Chen, D. Church, M.  
505 Clamp, R.R. Copley, T. Doerks, S.R. Eddy, E.E. Eichler, T.S. Furey, J. Galagan,  
506 J.G.R. Gilbert, C. Harmon, Y. Hayashizaki, D. Haussler, H. Hermjakob, K.  
507 Hokamp, W. Jang, L.S. Johnson, T.A. Jones, S. Kasif, A. Kasprzyk, S. Kennedy,  
508 W.J. Kent, P. Kitts, E. V. Koonin, I. Korf, D. Kulp, D. Lancet, T.M. Lowe, A.

- 509 McLysaght, T. Mikkelsen, J. V. Moran, N. Mulder, V.J. Pollara, C.P. Ponting, G.  
510 Schuler, J. Schultz, G. Slater, A.F.A. Smit, E. Stupka, J. Szustakowki, D. Thierry-  
511 Mieg, J. Thierry-Mieg, L. Wagner, J. Wallis, R. Wheeler, A. Williams, Y.I. Wolf,  
512 K.H. Wolfe, S.P. Yang, R.F. Yeh, F. Collins, M.S. Guyer, J. Peterson, A.  
513 Felsenfeld, K.A. Wetterstrand, R.M. Myers, J. Schmutz, M. Dickson, J.  
514 Grimwood, D.R. Cox, M. V. Olson, R. Kaul, C. Raymond, N. Shimizu, K.  
515 Kawasaki, S. Minoshima, G.A. Evans, M. Athanasiou, R. Schultz, A. Patrinos,  
516 M.J. Morgan, Initial sequencing and analysis of the human genome, *Nature*  
517 409 (2001) 860–921. <https://doi.org/10.1038/35057062>.
- 518 [3] C.R. Beck, P. Collier, C. Macfarlane, M. Malig, J.M. Kidd, E.E. Eichler, R.M.  
519 Badge, J. V. Moran, LINE-1 retrotransposition activity in human genomes,  
520 *Cell* 141 (2010) 1159–1170.
- 521 [4] B. Brouha, J. Schustak, R.M. Badge, S. Lutz-Prigge, A.H. Farley, J. V. Morant,  
522 H.H. Kazazian, Hot L1s account for the bulk of retrotransposition in the  
523 human population, *Proc. Natl. Acad. Sci. U. S. A.* 100 (2003) 5280–5285.
- 524 [5] S.J. Hoyt, J.M. Storer, G.A. Hartley, P.G.S. Grady, A. Gershman, L.G. de Lima, C.  
525 Limouse, R. Halabian, L. Wojenski, M. Rodriguez, N. Altemose, A. Rhie, L.J.  
526 Core, J.L. Gerton, W. Makalowski, D. Olson, J. Rosen, A.F.A. Smit, A.F. Straight,  
527 M.R. Vollger, T.J. Wheeler, M.C. Schatz, E.E. Eichler, A.M. Phillippy, W. Timp,  
528 K.H. Miga, R.J. O’Neill, From telomere to telomere: The transcriptional and  
529 epigenetic state of human repeat elements, *Science*. 376 (2022).  
530 <https://doi.org/10.1126/science.abk3112>.
- 531 [6] D.M. Sassaman, B.A. Dombroski, J. V. Moran, M.L. Kimberland, T.P. Naas, R.J.  
532 DeBerardinis, A. Gabriel, G.D. Swergold, H.H. Kazazian, Many human L1  
533 elements are capable of retrotransposition, *Nat. Genet.* 16 (1997) 37–43.

- 534 [7] J.M.C. e. al Tubio, Extensive transduction of nonrepetitive DNA mediated by  
535 L1retrotransposition in cancer genomes, *Science*. 345 (2014) 1251343.  
536 <https://doi.org/10.1126/science.1251343>.Extensive.
- 537 [8] A.D. Ewing, A. Gacita, L.D. Wood, F. Ma, D. Xing, M.S. Kim, S.S. Manda, G. Abril,  
538 G. Pereira, A. Makohon-Moore, L.H.J. Looijenga, A.J.M. Gillis, R.H. Hruban, R.A.  
539 Anders, K.E. Romans, A. Pandey, C.A. Iacobuzio-Donahue, B. Vogelstein, K.W.  
540 Kinzler, H.H. Kazazian, S. Solyom, Widespread somatic L1 retrotransposition  
541 occurs early during gastrointestinal cancer evolution, *Genome Res*. 25  
542 (2015) 1536–1545. <https://doi.org/10.1101/gr.196238.115>.
- 543 [9] B. Rodriguez-Martin, E.G. Alvarez, A. Baez-Ortega, J. Zamora, F. Supek, J.  
544 Demeulemeester, M. Santamarina, Y.S. Ju, J. Temes, D. Garcia-Souto, H.  
545 Detering, Y. Li, J. Rodriguez-Castro, A. Dueso-Barroso, A.L. Bruzos, S.C.  
546 Dentro, M.G. Blanco, G. Contino, D. Ardeljan, M. Tojo, N.D. Roberts, S.  
547 Zumalave, P.A.W. Edwards, J. Weischenfeldt, M. Puiggròs, Z. Chong, K. Chen,  
548 E.A. Lee, J.A. Wala, K. Raine, A. Butler, S.M. Waszak, F.C.P. Navarro, S.E.  
549 Schumacher, J. Monlong, F. Maura, N. Bolli, G. Bourque, M. Gerstein, P.J. Park,  
550 D.C. Wedge, R. Beroukhim, D. Torrents, J.O. Korbelt, I.I. Martincorena, R.C.  
551 Fitzgerald, P. Van Loo, H.H. Kazazian, K.H. Burns, K.C. Akdemir, E.G. Alvarez,  
552 A. Baez-Ortega, R. Beroukhim, P.C. Boutros, D.D.L. Bowtell, B. Brors, K.H.  
553 Burns, P.J. Campbell, K. Chan, I. Cortés-Ciriano, A. Dueso-Barroso, A.J.  
554 Dunford, P.A.W. Edwards, X. Estivill, D. Etemadmoghadam, L. Feuerbach, J.L.  
555 Fink, M. Frenkel-Morgenstern, D.W. Garsed, M. Gerstein, D.A. Gordenin, D.  
556 Haan, J.E. Haber, J.M. Hess, B. Hutter, M. Imielinski, D.T.W. Jones, M.D.  
557 Kazanov, L.J. Klimczak, Y. Koh, J.O. Korbelt, K. Kumar, E.A. Lee, J.J.K. Lee, Y. Li,  
558 A.G. Lynch, G. Macintyre, F. Markowetz, A. Martinez-Fundichely, M.



559 Meyerson, S. Miyano, H. Nakagawa, F.C.P. Navarro, S. Ossowski, J. V. Pearson,  
560 J. V. Pearson, K. Rippe, N.D. Roberts, S.A. Roberts, B. Rodriguez-Martin, B.  
561 Rodriguez-Martin, S.E. Schumacher, M. Shackleton, N. Sidiropoulos, L.  
562 Sieverling, C. Stewart, J.M.C. Tubio, I. Villasante, N. Waddell, J.A. Wala, J.  
563 Weischenfeldt, L. Yang, X. Yao, S.S. Yoon, J. Zamora, C.Z. Zhang, P.J. Campbell,  
564 J.M.C. Tubio, S.E. Schumacher, R. Scully, B. Rodriguez-Martin, Y.S. Ju, M.D.  
565 Kazanov, L.J. Klimczak, Y. Koh, J.O. Korbel, K. Kumar, E.A. Lee, J.J.K. Lee, Y. Li,  
566 A.G. Lynch, G. Macintyre, F. Markowitz, I.I. Martincorena, A. Martinez-  
567 Fundichely, M. Meyerson, S. Miyano, H. Nakagawa, F.C.P. Navarro, S.  
568 Ossowski, J. V. Pearson, M. Puiggròs, K. Rippe, N.D. Roberts, S.A. Roberts, B.  
569 Rodriguez-Martin, S.E. Schumacher, R. Scully, M. Shackleton, N. Sidiropoulos,  
570 L. Sieverling, C. Stewart, J.M.C. Tubio, I. Villasante, N. Waddell, J.A. Wala, J.  
571 Weischenfeldt, L. Yang, X. Yao, S.S. Yoon, J. Zamora, C.Z. Zhang, P.J. Campbell,  
572 J.M.C. Tubio, Pan-cancer analysis of whole genomes identifies driver  
573 rearrangements promoted by LINE-1 retrotransposition, *Nat. Genet.* 52  
574 (2020) 306–319. <https://doi.org/10.1038/s41588-019-0562-0>.  
575 [10] A. Jou, J. Hess, *Epidemiology and Molecular Biology of Head and Neck*  
576 *Cancer, Oncol. Res. Treat.* 40 (2017) 328–332.  
577 <https://doi.org/10.1159/000477127>.  
578 [11] M. Plath, J. Gass, M. Hlevnjak, Q. Li, B. Feng, X.P. Hostench, M. Bieg, L.  
579 Schroeder, D. Holzinger, M. Zapatka, K. Freier, W. Weichert, J. Hess, K. Zaoui,  
580 Unraveling most abundant mutational signatures in head and neck cancer,  
581 *Int. J. Cancer* 148 (2021) 115–127. <https://doi.org/10.1002/IJC.33297>.  
582 [12] C.R. Leemans, B.J.M. Braakhuis, R.H. Brakenhoff, *The molecular biology of*  
583 *head and neck cancer, Nat. Rev. Cancer* 11 (2011) 9–22.

- 584 <https://doi.org/10.1038/nrc2982>.
- 585 [13] H. Li, Aligning sequence reads, clone sequences and assembly contigs with  
586 BWA-MEM, ArXiv: Genomics (2013).  
587 <https://doi.org/10.6084/M9.FIGSHARE.963153.V1>.
- 588 [14] P. Danecek, J.K. Bonfield, J. Liddle, J. Marshall, V. Ohan, M.O. Pollard, A.  
589 Whitwham, T. Keane, S.A. McCarthy, R.M. Davies, Twelve years of SAMtools  
590 and BCFtools, Gigascience 10 (2021) 1–4.  
591 <https://doi.org/10.1093/GIGASCIENCE/GIAB008>.
- 592 [15] Broad Institute, Picard Tools, <Http://Broadinstitute.Github.Io/Picard/> (n.d.).
- 593 [16] W. Huang, L. Li, J.R. Myers, G.T. Marth, ART: a next-generation sequencing  
594 read simulator, Bioinformatics 28 (2012) 593–594.  
595 <https://doi.org/10.1093/BIOINFORMATICS/BTR708>.
- 596 [17] A.R. Quinlan, I.M. Hall, BEDTools: a flexible suite of utilities for comparing  
597 genomic features, Bioinformatics 26 (2010) 841–842.  
598 <https://doi.org/10.1093/BIOINFORMATICS/BTQ033>.
- 599 [18] M. V. Kuleshov, M.R. Jones, A.D. Rouillard, N.F. Fernandez, Q. Duan, Z. Wang,  
600 S. Koplev, S.L. Jenkins, K.M. Jagodnik, A. Lachmann, M.G. McDermott, C.D.  
601 Monteiro, G.W. Gundersen, A. Maayan, Enrichr: a comprehensive gene set  
602 enrichment analysis web server 2016 update, Nucleic Acids Res. 44 (2016)  
603 W90–W97. <https://doi.org/10.1093/NAR/GKW377>.
- 604 [19] D. Ardeljan, M.S. Taylor, D.T. Ting, K.H. Burns, The Human Long Interspersed  
605 Element-1 Retrotransposon: An Emerging Biomarker of Neoplasia, Clin.  
606 Chem. 63 (2017) 816–822.  
607 <https://doi.org/10.1373/CLINCHEM.2016.257444>.
- 608 [20] M.L. Filipenko, U.A. Boyarskikh, L.S. Leskov, K. V. Subbotina, E.A. Khrapov, A.

- 609 V. Sokolov, I.S. Stilidi, N.E. Kushlinskii, The Level of LINE-1 mRNA Is  
610 Increased in Extracellular Circulating Plasma RNA in Patients with  
611 Colorectal Cancer, *Bull. Exp. Biol. Med.* 173 (2022) 261–264.  
612 <https://doi.org/10.1007/S10517-022-05530-2>/METRICS.
- 613 [21] S. Sato, M. Gillette, P.R. de Santiago, E. Kuhn, M. Burgess, K. Doucette, Y. Feng,  
614 C. Mendez-Dorantes, P.J. Ippoliti, S. Hobday, M.A. Mitchell, K. Doberstein, S.M.  
615 Gysler, M.S. Hirsch, L. Schwartz, M.J. Birrer, S.J. Skates, K.H. Burns, S.A. Carr,  
616 R. Drapkin, LINE-1 ORF1p as a candidate biomarker in high grade serous  
617 ovarian carcinoma, *Sci. Rep.* 13 (2023). [https://doi.org/10.1038/s41598-](https://doi.org/10.1038/s41598-023-28840-5)  
618 [023-28840-5](https://doi.org/10.1038/s41598-023-28840-5).
- 619 [22] M.S. Taylor, C. Wu, P.C. Fridy, S.J. Zhang, Y. Senussi, J.C. Wolters, T. Cajuso, W.-  
620 C. Cheng, J.D. Heaps, B.D. Miller, K. Mori, L. Cohen, H. Jiang, K.R. Molloy, B.T.  
621 Chait, M.G. Goggins, I. Bhan, J.W. Franses, X. Yang, M.-E. Taplin, X. Wang, D.C.  
622 Christiani, B.E. Johnson, M. Meyerson, R. Uppaluri, A.M. Egloff, E.N. Denault,  
623 L.M. Spring, T.-L. Wang, I.-M. Shih, J.E. Fairman, E. Jung, K.S. Arora, O.H.  
624 Yilmaz, S. Cohen, T. Sharova, G. Chi, B.L. Norden, Y. Song, L.T. Nieman, L.  
625 Pappas, A.R. Parikh, M.R. Strickland, R.B. Corcoran, T. Mustelin, G. Eng, O.H.  
626 Yilmaz, U.A. Matulonis, S.J. Skates, B.R. Rueda, R. Drapkin, S.J. Klempner, V.  
627 Deshpande, D.T. Ting, M.P. Rout, J. LaCava, D.R. Walt, K.H. Burns,  
628 Ultrasensitive detection of circulating LINE-1 ORF1p as a specific multi-  
629 cancer biomarker, *Cancer Discov.* 13 (2023) OF1–OF16.  
630 [https://doi.org/10.1158/2159-8290.CD-23-](https://doi.org/10.1158/2159-8290.CD-23-0313/729035/AM/ULTRASENSITIVE-DETECTION-OF-CIRCULATING-LINE-1)  
631 [0313/729035/AM/ULTRASENSITIVE-DETECTION-OF-CIRCULATING-LINE-](https://doi.org/10.1158/2159-8290.CD-23-0313/729035/AM/ULTRASENSITIVE-DETECTION-OF-CIRCULATING-LINE-1)  
632 [1](https://doi.org/10.1158/2159-8290.CD-23-0313/729035/AM/ULTRASENSITIVE-DETECTION-OF-CIRCULATING-LINE-1).
- 633 [23] J.K. Baillie, M.W. Barnett, K.R. Upton, D.J. Gerhardt, T.A. Richmond, F. De

- 634 Sapio, P.M. Brennan, P. Rizzu, S. Smith, M. Fell, R.T. Talbot, S. Gustincich, T.C.  
635 Freeman, J.S. Mattick, D.A. Hume, P. Heutink, P. Carninci, J.A. Jeddloh, G.J.  
636 Faulkner, Somatic retrotransposition alters the genetic landscape of the  
637 human brain, *Nature* 479 (2011) 534–537.  
638 <https://doi.org/10.1038/nature10531>.
- 639 [24] C. Chu, R. Borges-Monroy, V. V. Viswanadham, S. Lee, H. Li, E.A. Lee, P.J. Park,  
640 Comprehensive identification of transposable element insertions using  
641 multiple sequencing technologies, *Nat. Commun.* 12 (2021).  
642 <https://doi.org/10.1038/s41467-021-24041-8>.
- 643 [25] E.J. Gardner, V.K. Lam, D.N. Harris, N.T. Chuang, E.C. Scott, W. Stephen  
644 Pittard, R.E. Mills, S.E. Devine, The mobile element locator tool (MELT):  
645 Population-scale mobile element discovery and biology, *Genome Res.* 27  
646 (2017) 1916–1929. <https://doi.org/10.1101/GR.218032.116/-/DC1>.
- 647 [26] D.T. jwa. Thung, J. de Ligt, L.E.M. Vissers, M. Steehouwer, M. Kroon, P. de  
648 Vries, E.P. Slagboom, K. Ye, J.A. Veltman, J.Y. Hehir-Kwa, Mobster: accurate  
649 detection of mobile element insertions in next generation sequencing data,  
650 *Genome Biol.* 15 (2014) 488. [https://doi.org/10.1186/S13059-014-0488-](https://doi.org/10.1186/S13059-014-0488-X/FIGURES/3)  
651 [X/FIGURES/3](https://doi.org/10.1186/S13059-014-0488-X/FIGURES/3).
- 652 [27] W. Zhou, S.B. Emery, D.A. Flasch, Y. Wang, K.Y. Kwan, J.M. Kidd, J. V. Moran,  
653 R.E. Mills, Identification and characterization of occult human-specific LINE-  
654 1 insertions using long-read sequencing technology, *Nucleic Acids Res.* 48  
655 (2020) 1146–1163. <https://doi.org/10.1093/NAR/GKZ1173>.
- 656 [28] A.C. Katz-Summercorn, S. Jammula, A. Frangou, I. Peneva, M. O'Donovan, M.  
657 Tripathi, S. Malhotra, M. di Pietro, S. Abbas, G. Devonshire, W. Januszewicz, A.  
658 Blasko, K. Nowicki-Osuch, S. MacRae, A. Northrop, A.M. Redmond, D.C.

- 659 Wedge, R.C. Fitzgerald, Multi-omic cross-sectional cohort study of pre-  
660 malignant Barrett's esophagus reveals early structural variation and  
661 retrotransposon activity, *Nat. Commun.* 13 (2022).  
662 <https://doi.org/10.1038/s41467-022-28237-4>.
- 663 [29] A.W. Caliri, A. Caceres, S. Tommasi, A. Besaratinia, Hypomethylation of LINE-  
664 1 repeat elements and global loss of DNA hydroxymethylation in vapers and  
665 smokers, *Epigenetics* 15 (2020) 816–829.  
666 <https://doi.org/10.1080/15592294.2020.1724401>.
- 667 [30] H. Shigaki, Y. Baba, M. Watanabe, S. Iwagami, K. Miyake, T. Ishimoto, M.  
668 Iwatsuki, H. Baba, LINE-1 hypomethylation in noncancerous esophageal  
669 mucosae is associated with smoking history, *Ann. Surg. Oncol.* 19 (2012)  
670 4238–4243. <https://doi.org/10.1245/s10434-012-2488-y>.
- 671 [31] P. Vineis, M. Alavanja, P. Buffler, E. Fontham, S. Franceschi, Y.T. Gao, P.C.  
672 Gupta, A. Hackshaw, E. Matos, J. Samet, F. Sitas, J. Smith, L. Stayner, K. Straif,  
673 M.J. Thun, H.E. Wichmann, A.H. Wu, D. Zaridze, R. Peto, R. Doll, Tobacco and  
674 cancer: recent epidemiological evidence, *J. Natl. Cancer Inst.* 96 (2004) 99–  
675 106. <https://doi.org/10.1093/JNCI/DJH014>.
- 676 [32] K. Hur, P. Cejas, J. Feliu, J. Moreno-Rubio, E. Burgos, C.R. Boland, A. Goel,  
677 Hypomethylation of long interspersed nuclear element-1 (LINE-1) leads to  
678 activation of proto-oncogenes in human colorectal cancer metastasis, *Gut* 63  
679 (2014) 635–646. <https://doi.org/10.1136/GUTJNL-2012-304219>.
- 680 [33] M. Casarotto, V. Lupato, G. Giurato, R. Guerrieri, S. Sulfaro, A. Salvati, E.  
681 D'Angelo, C. Furlan, A. Menegaldo, L. Baboci, B. Montico, I. Turturici, R.  
682 Dolcetti, S. Romeo, V. Baggio, S. Corrado, G. Businello, M. Guido, A. Weisz, V.  
683 Giacomarra, G. Franchin, A. Steffan, L. Sigalotti, E. Vaccher, P. Boscolo-Rizzo,

- 684 P. Jerry, G. Fanetti, E. Fratta, LINE-1 hypomethylation is associated with poor  
685 outcomes in locoregionally advanced oropharyngeal cancer, Clin.  
686 Epigenetics 14 (2022). <https://doi.org/10.1186/s13148-022-01386-5>.
- 687 [34] C. Furlan, J. Polesel, L. Barzan, G. Franchin, S. Sulfaro, S. Romeo, F. Colizzi, A.  
688 Rizzo, V. Baggio, V. Giacomarra, A.P. Dei Tos, P. Boscolo-Rizzo, E. Vaccher, R.  
689 Dolcetti, L. Sigalotti, E. Fratta, Prognostic significance of LINE-1  
690 hypomethylation in oropharyngeal squamous cell carcinoma, Clin.  
691 Epigenetics 9 (2017). [https://doi.org/10.1186/S13148-017-0357-](https://doi.org/10.1186/S13148-017-0357-Z/FIGURES/4)  
692 [Z/FIGURES/4](https://doi.org/10.1186/S13148-017-0357-Z/FIGURES/4).
- 693 [35] K. Misawa, S. Yamada, M. Mima, T. Nakagawa, T. Kurokawa, A. Imai, D.  
694 Mochizuki, D. Shinmura, T. Yamada, J. Kita, R. Ishikawa, Y. Yamaguchi, Y.  
695 Misawa, T. Kanazawa, H. Kawasaki, H. Mineta, Long interspersed nuclear  
696 element 1 hypomethylation has novel prognostic value and potential utility  
697 in liquid biopsy for oral cavity cancer, Biomark. Res. 8 (2020) 1–10.  
698 <https://doi.org/10.1186/S40364-020-00235-Y/FIGURES/6>.
- 699 [36] A. Benard, C.J.H. Van De Velde, L. Lessard, H. Putter, L. Takeshima, P.J.K.  
700 Kuppen, D.S.B. Hoon, Epigenetic status of LINE-1 predicts clinical outcome in  
701 early-stage rectal cancer, Br. J. Cancer 109 (2013) 3073–3083.  
702 <https://doi.org/10.1038/bjc.2013.654>.
- 703 [37] E.J. Kim, W.C. Chung, D.B. Kim, Y.J. Kim, J.M. Lee, J.H. Jung, Y.K. Lee, Long  
704 interspersed nuclear element (LINE)-1 methylation level as a molecular  
705 marker of early gastric cancer, Dig. Liver Dis. 48 (2016) 1093–1097.  
706 <https://doi.org/10.1016/j.dld.2016.06.002>.
- 707 [38] E. Sunami, M. de Maat, A. Vu, R.R. Turner, D.S.B. Hoon, LINE-1  
708 Hypomethylation During Primary Colon Cancer Progression, PLoS One 6

- 709 (2011) e18884. <https://doi.org/10.1371/JOURNAL.PONE.0018884>.
- 710 [39] J.P. Foy, C.R. Pickering, V.A. Papadimitrakopoulou, J. Jelinek, S.H. Lin, W.N.  
711 William, M.J. Frederick, J. Wang, W. Lang, L. Feng, L. Zhang, E.S. Kim, Y.H. Fan,  
712 W.K. Hong, A.K. El-Naggar, J.J. Lee, J.N. Myers, J.P. Issa, S.M. Lippman, L. Mao,  
713 P. Saintigny, New DNA methylation markers and global DNA  
714 hypomethylation are associated with oral cancer development, *Cancer Prev.*  
715 *Res.* 8 (2015) 1027–1035. [https://doi.org/10.1158/1940-6207.CAPR-14-](https://doi.org/10.1158/1940-6207.CAPR-14-0179)  
716 0179.
- 717 [40] W. McKerrow, X. Wang, C. Mendez-Dorantes, P. Mita, S. Cao, M. Grivainis, L.  
718 Ding, J. LaCava, K.H. Burns, J.D. Boeke, D. Fenyö, LINE-1 expression in cancer  
719 correlates with p53 mutation, copy number alteration, and S phase  
720 checkpoint, *Proc. Natl. Acad. Sci. U. S. A.* 119 (2022).  
721 <https://doi.org/10.1073/PNAS.2115999119/-/DCSUPPLEMENTAL>.
- 722 [41] B. Tiwari, A.E. Jones, C.J. Caillet, S. Das, S.K. Royer, J.M. Abrams, P53 directly  
723 represses human LINE1 transposons, *Genes Dev.* 34 (2020) 1439–1451.  
724 <https://doi.org/10.1101/GAD.343186.120/-/DC1>.
- 725 [42] P. Mita, X. Sun, D. Fenyö, D.J. Kahler, D. Li, N. Agmon, A. Wudzinska, S.  
726 Keegan, J.S. Bader, C. Yun, J.D. Boeke, BRCA1 and S phase DNA repair  
727 pathways restrict LINE-1 retrotransposition in human cells, *Nat. Struct. Mol.*  
728 *Biol.* 27 (2020) 179–191. <https://doi.org/10.1038/S41594-020-0374-Z>.
- 729 [43] N. Rodić, R. Sharma, R. Sharma, J. Zampella, L. Dai, M.S. Taylor, R.H. Hruban,  
730 C.A. Iacobuzio-Donahue, A. Maitra, M.S. Torbenson, M. Goggins, I.M. Shih, A.S.  
731 Duffield, E.A. Montgomery, E. Gabrielson, G.J. Netto, T.L. Lotan, A.M. De  
732 Marzo, W. Westra, Z.A. Binder, B.A. Orr, G.L. Gallia, C.G. Eberhart, J.D. Boeke,  
733 C.R. Harris, K.H. Burns, Long interspersed element-1 protein expression is a

- 734 hallmark of many human cancers, *Am. J. Pathol.* 184 (2014) 1280–1286.
- 735 <https://doi.org/10.1016/j.ajpath.2014.01.007>.
- 736 [44] D. Mangoni, A. Simi, P. Lau, A. Armaos, F. Ansaloni, A. Codino, D. Damiani, L.
- 737 Floreani, V. Di Carlo, D. Vozzi, F. Persichetti, C. Santoro, L. Pandolfini, G.G.
- 738 Tartaglia, R. Sanges, S. Gustincich, LINE-1 regulates cortical development by
- 739 acting as long non-coding RNAs, *Nat. Commun.* 14 (2023).
- 740 <https://doi.org/10.1038/s41467-023-40743-7>.
- 741 [45] M. Martínez-Fernández, A. Feber, M. Dueñas, C. Segovia, C. Rubio, M.
- 742 Fernandez, F. Villacampa, J. Duarte, F.F. López-Calderón, M.J. Gómez-
- 743 Rodriguez, D. Castellano, J.L. Rodriguez-Peralto, F. De La Rosa, S. Beck, J.M.
- 744 Paramio, Analysis of the polycomb-related lncRNAs HOTAIR and ANRIL in
- 745 bladder cancer, *Clin. Epigenetics* 7 (2015). [https://doi.org/10.1186/s13148-](https://doi.org/10.1186/s13148-015-0141-x)
- 746 [015-0141-x](https://doi.org/10.1186/s13148-015-0141-x).
- 747 [46] C.A. Ishak, A.E. Marshall, D.T. Passos, C.R. White, J. Seung, M.J. Cecchini, S.
- 748 Ferwati, W.A. Macdonald, J. Christopher, I.D. Welch, S.M. Rubin, M.R.W.
- 749 Mann, F.A. Dick, An RB-EZH2 Complex Mediates Silencing of Repetitive DNA
- 750 Sequences, 64 (2017) 1074–1087.
- 751 <https://doi.org/10.1016/j.molcel.2016.10.021.An>.
- 752 [47] P. V. Angadi, J.K. Savitha, S.S. Rao, R.Y. Sivaranjini, Oral field cancerization:
- 753 Current evidence and future perspectives, *Oral Maxillofac. Surg.* 16 (2012)
- 754 171–180. <https://doi.org/10.1007/S10006-012-0317-X/TABLES/1>.
- 755 [48] I. Martincorena, A. Roshan, M. Gerstung, P. Ellis, P. Van Loo, S. McLaren, D.C.
- 756 Wedge, A. Fullam, L.B. Alexandrov, J.M. Tubio, L. Stebbings, A. Menzies, S.
- 757 Widaa, M.R. Stratton, P.H. Jones, P.J. Campbell, High burden and pervasive
- 758 positive selection of somatic mutations in normal human skin, *Science*. 348



- 759 (2015) 880–886.
- 760 [https://doi.org/10.1126/SCIENCE.AAA6806/SUPPL\\_FILE/AAA6806-](https://doi.org/10.1126/SCIENCE.AAA6806/SUPPL_FILE/AAA6806-)
- 761 [MARTINCORENA-SM.PDF](https://doi.org/10.1126/SCIENCE.AAA6806/SUPPL_FILE/AAA6806-MARTINCORENA-SM.PDF).
- 762 [49] K. Yoshida, K.H.C. Gowers, H. Lee-Six, D.P. Chandrasekharan, T. Coorens, E.F.
- 763 Maughan, K. Beal, A. Menzies, F.R. Millar, E. Anderson, S.E. Clarke, A.
- 764 Pennycuick, R.M. Thakrar, C.R. Butler, N. Kakiuchi, T. Hirano, R.E. Hynds, M.R.
- 765 Stratton, I. Martincorena, S.M. Janes, P.J. Campbell, Tobacco smoking and
- 766 somatic mutations in human bronchial epithelium, *Nat.* 2020 5787794 578
- 767 (2020) 266–272. <https://doi.org/10.1038/s41586-020-1961-1>.
- 768 [50] T.G. Paulson, P.C. Galipeau, K.M. Oman, C.A. Sanchez, M.K. Kuhner, L.P. Smith,
- 769 K. Hadi, M. Shah, K. Arora, J. Shelton, M. Johnson, A. Corvelo, C.C. Maley, X.
- 770 Yao, R. Sanghvi, E. Venturini, A.K. Emde, B. Hubert, M. Imielinski, N. Robine,
- 771 B.J. Reid, X. Li, Somatic whole genome dynamics of precancer in Barrett’s
- 772 esophagus reveals features associated with disease progression, *Nat.*
- 773 *Commun.* 13 (2022). <https://doi.org/10.1038/s41467-022-29767-7>.
- 774 [51] I. Martincorena, J.C. Fowler, A. Wabik, A.R.J. Lawson, F. Abascal, M.W.J. Hall,
- 775 A. Cagan, K. Murai, K. Mahbubani, M.R. Stratton, R.C. Fitzgerald, P.A.
- 776 Handford, P.J. Campbell, K. Saeb-Parsy, P.H. Jones, Somatic mutant clones
- 777 colonize the human esophagus with age, *Science.* 362 (2018) 911–917.
- 778 <https://doi.org/10.1126/science.aau3879>.
- 779 [52] A.R.J. Lawson, F. Abascal, T.H.H. Coorens, Y. Hooks, L. O’Neill, C. Latimer, K.
- 780 Raine, M.A. Sanders, A.Y. Warren, K.T.A. Mahbubani, B. Bareham, T.M. Butler,
- 781 L.M.R. Harvey, A. Cagan, A. Menzies, L. Moore, A.J. Colquhoun, W. Turner, B.
- 782 Thomas, V. Gnanapragasam, N. Williams, D.M. Rassl, H. Vöhringer, S.
- 783 Zumalave, J. Nangalia, J.M.C. Tubío, M. Gerstung, K. Saeb-Parsy, M.R. Stratton,

- 784 P.J. Campbell, T.J. Mitchell, I. Martincorena, Extensive heterogeneity in  
785 somatic mutation and selection in the human bladder, *Science*. 370 (2020)  
786 75–82. <https://doi.org/10.1126/science.aba8347>.
- 787 [53] C.H. Nam, J. Youk, J.Y. Kim, J. Lim, J.W. Park, S.A. Oh, H.J. Lee, J.W. Park, H.  
788 Won, Y. Lee, S.Y. Jeong, D.S. Lee, J.W. Oh, J. Han, J. Lee, H.W. Kwon, M.J. Kim,  
789 Y.S. Ju, Widespread somatic L1 retrotransposition in normal colorectal  
790 epithelium, *Nature* 617 (2023) 540–547. [https://doi.org/10.1038/s41586-](https://doi.org/10.1038/s41586-023-06046-z)  
791 [023-06046-z](https://doi.org/10.1038/s41586-023-06046-z).
- 792 [54] M. Shademan, K. Zare, M. Zahedi, H. Mosannen Mozaffari, H. Bagheri  
793 Hosseini, K. Ghaffarzadegan, L. Goshayeshi, H. Dehghani, Promoter  
794 methylation, transcription, and retrotransposition of LINE-1 in colorectal  
795 adenomas and adenocarcinomas, *Cancer Cell Int*. 20 (2020) 1–16.  
796 <https://doi.org/10.1186/S12935-020-01511-5>.  
797  
798

799 **FIGURE LEGENDS**

800 **Figure 1. RetroTest design and benchmarking.** **A.** RetroTest design. **B.**  
801 Scatterplot and correlation between L1 activation and orphan transductions (TD2)  
802 in the International Consortium of PanCancer (PCAWG) data. The number of L1 3'  
803 transductions measured L1 activation. **C.** Performance of RetroTest for different  
804 sequencing coverages using an artificially generated GRC37/hg19 genome with a  
805 total of 2,480 randomly distributed L1 transductions at 50% VAF. **D.** Performance  
806 of RetroTest with respect to the VAF of L1 integrations, using the artificially  
807 generated GRC37/hg19 genome with a total of 2,480 randomly distributed L1  
808 transductions at different VAFs. **E.** Performance of TraFiC with respect of the VAF  
809 of L1 integrations, using the artificially generated GRC37/hg19 genome with a  
810 total of 2,480 randomly distributed L1 transductions at different VAFs. **F.** Venn  
811 diagram of the number of L1 insertions detected by RetroTest and TraFiC in the  
812 artificial genome with a VAF of 50% for L1 insertions.

813

814 **Figure 2. L1 activation measured by RetroTest in the HNSCC cohort (n=96).** **A.**  
815 Quantification of L1 activation in HNSCC tumors as the number of orphan  
816 transduction detected by RetroTest. **B.** Boxplot of L1 activation with respect to  
817 early (T1-T2) and advanced (T3-T4) TNM stages. Differential activation p-value  
818 was derived by the Wilcoxon test. To correct coverage-related bias, L1 activation  
819 was calculated as the number of TD2 divided by its median coverage. **C.** Boxplot of  
820 L1 activation with respect to smoking status. Differential activation p-value was  
821 derived by the Wilcoxon test. To correct coverage-related bias, L1 activation was  
822 calculated as the number of TD2 divided by its median coverage. **D.** Kaplan-Meier  
823 curves for overall survival with respect to L1 activation rate at T1 stage. Patients

824 were grouped into high (above the median) and low (below the median) L1  
825 activation rate. Log-rank test was used to calculate the p-value. To correct  
826 coverage-related bias, L1 activation was calculated as the number of TD2 divided  
827 by its median coverage. **E.** Oncoplot showing the genes affected by L1 insertions  
828 and their original source elements. A total of 27 patients presented genes affected  
829 by L1 insertions from 46 different source elements.

830

831 **Figure 3. Characterization of the mutational profile of HNSCC patients by**

832 **WGS (n=19).** **A.** Oncoplot showing the genes harboring somatic mutations in  
833 HNSCC patients. The type of mutation in each gene and the L1 activation (number  
834 of L1 insertions in each patient) is shown. **B.** Boxplot of L1 activation with respect  
835 to TP53 mutation or wild-type status. To correct coverage-related bias, L1  
836 activation was calculated as the number of TD2 divided by its median coverage.  
837 Differential activation p-value was derived by the Wilcoxon test. **C.** Barplot of the  
838 Pathway enrichment analysis based on the 918 genes somatically mutated genes.  
839 Enrichment p-values were calculated with the Fisher exact test. **D.** Barplot of the  
840 transcription factor binding enrichment analysis based on the 918 genes  
841 somatically mutated genes. Enrichment p-values were calculated with the Fisher  
842 exact test.

843

844 **Figure 4. Evaluation of L1 activation in normal adjacent tissue.** **A.** Schematic

845 representation of the evaluation of the field cancerization process. **B.** Number of L1  
846 active elements in normal adjacent tissue of HNSCC patients (n=9), compared to L1  
847 activation in paired tumor tissue and PBMCs as germline control from the same  
848 patients.

849 **Table 1. Baseline characteristics of the HNSCC patients and**  
850 **clinicopathological results in the series.**

| N = 96           |                |
|------------------|----------------|
| Mean age (range) | 67.4 (38 – 90) |
| Sex              |                |
| Female           | 20             |
| Male             | 71             |
| NA               | 5              |
| TNM stage        |                |
| T1               | 16             |
| T2               | 19             |
| T3               | 18             |
| T4               | 34             |
| NA               | 9              |
| Exitus           |                |
| No               | 50             |
| Yes              | 38             |
| NA               | 8              |
| Alcohol          |                |
| Drinker          | 61             |
| Non-drinker      | 24             |
| NA               | 11             |
| Smoking habits   |                |
| Smoker           | 64             |

Non-smoker 22

NA 10

---

851

852

853

854

855

856 **Table 2. Number of HNSCC patients showing L1 activation along TNM stages.**

|             | TNM stage |    |    |    |
|-------------|-----------|----|----|----|
|             | T1        | T2 | T3 | T4 |
| L1 active   | 10        | 12 | 17 | 25 |
| L1 inactive | 6         | 7  | 1  | 9  |

857

858 **ADDITIONAL FILES**

859 **Additional file 1 (pdf): Supplementary Methods:** RetroTest library and target  
860 sequencing; RetroTest method in detail; RetroTest benchmarking; Whole Genome  
861 Sequencing and determination of mutation profile; Gene pathway databases uses  
862 for enrichment analysis

863 **Additional file 2 (xls): Table S1:** RetroTest benchmarking. **Table S2:** HNSCC  
864 somatic variants. **Table S3:** Gene pathways affected by HNSCC somatic variants.  
865 **Table S4:** Transcription factors binding to genes affected by HNSCC somatic  
866 variants. **Table S5:** HNSCC NAT somatic variants

867 **Additional file 3 (pdf). Figure S1.** Kaplan-Meier curves for overall survival in  
868 HNSCC cohort with respect to (A) L1 activation status (active vs inactive) and (B)  
869 L1 activation rate (with respect to the median, being high above vs low as below  
870 the median). Log-rank test was used to calculate the p-value.

871

872

873

874

875

876

877

878

879

880

881

882



883 FIGURES

884 Figure 1.

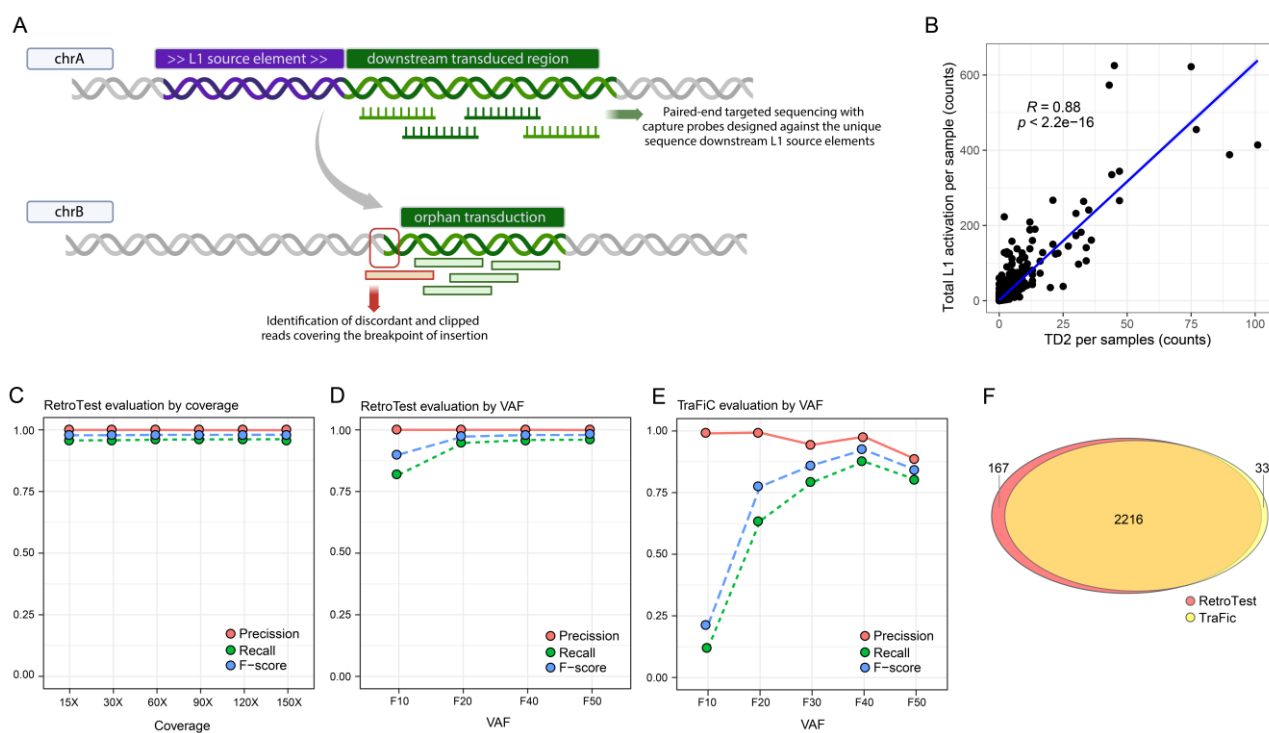

885

886

887

888

889

890

891

892

893

894

895

896

897

898

899 **Figure 2.**

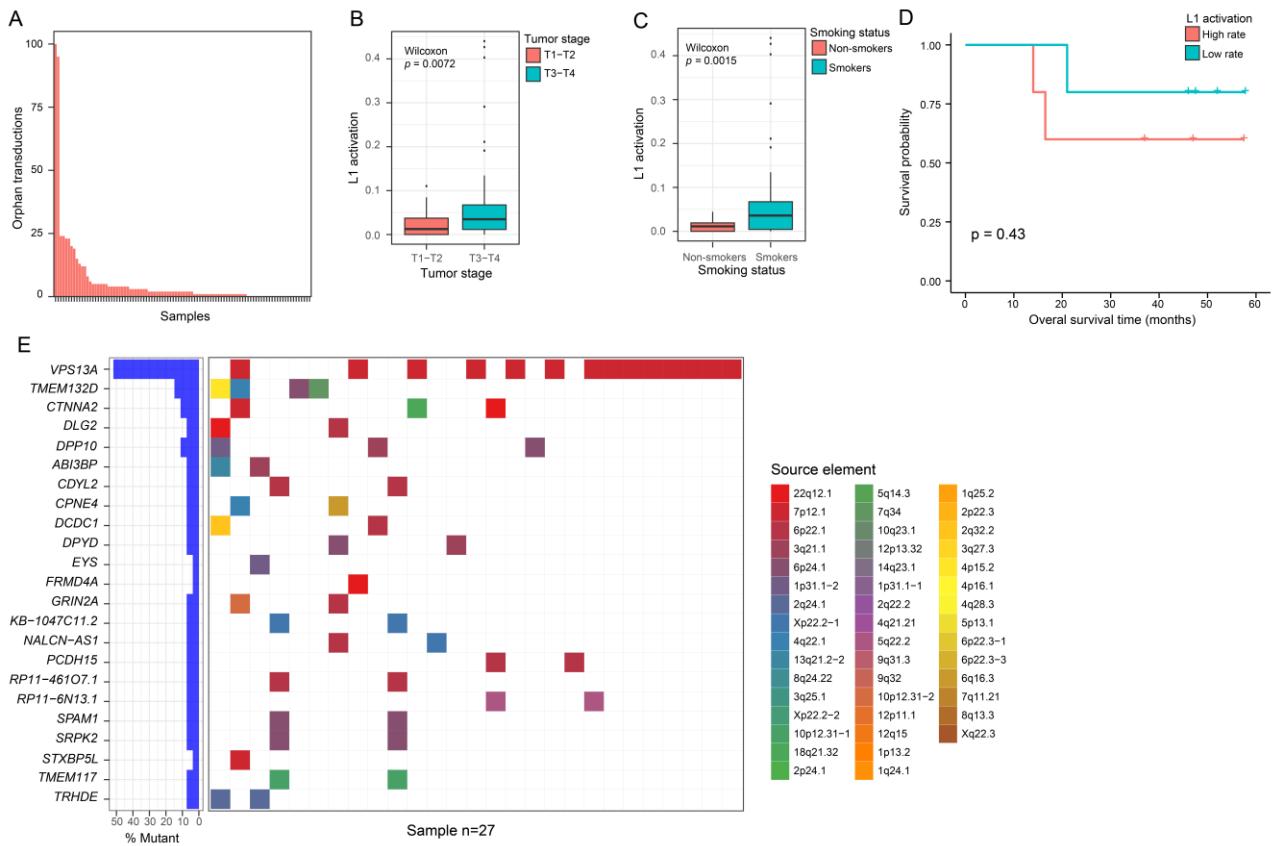

900

901

902

903

904

905

906

907

908

909

910

911

912



925 **Figure 4.**

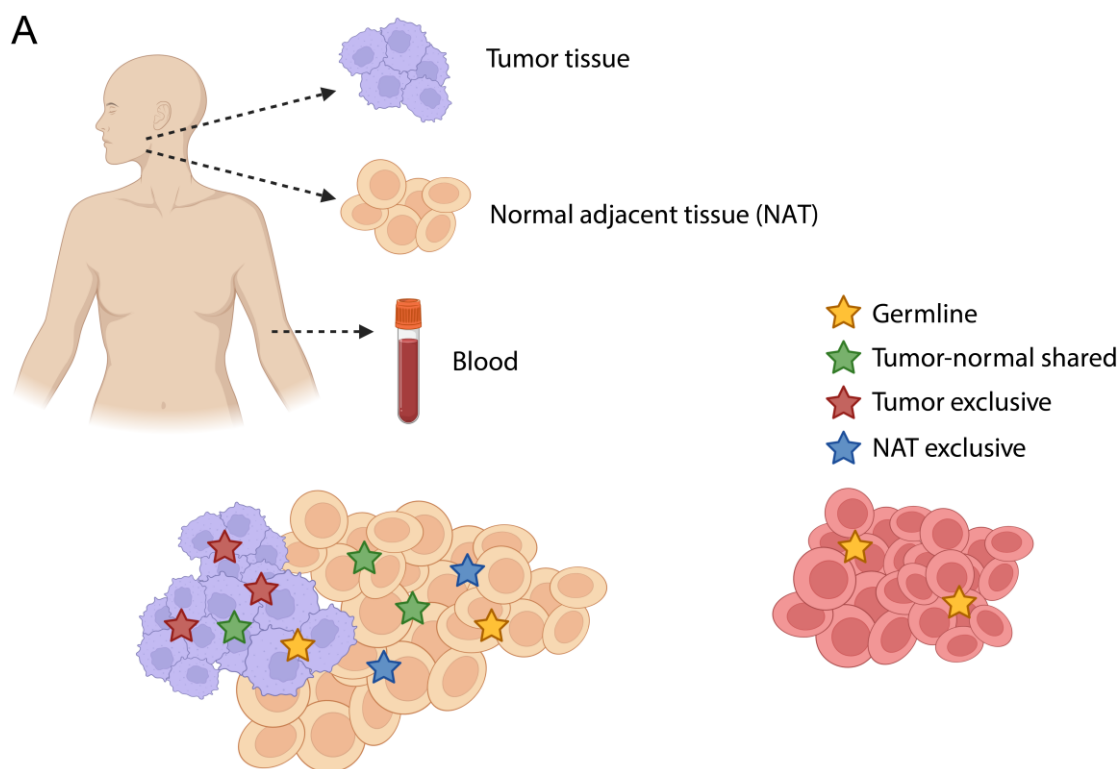

**B**

| Patient  | NAT exclusive | Tumor exclusive | Tumor-normal shared | Germline | Total |
|----------|---------------|-----------------|---------------------|----------|-------|
| HNSCC_01 | 0             | 20              | 0                   | 1        | 21    |
| HNSCC_02 | 1             | 95              | 1                   | 0        | 97    |
| HNSCC_03 | 1             | 24              | 0                   | 0        | 25    |
| HNSCC_04 | 0             | 100             | 0                   | 0        | 100   |
| HNSCC_05 | 0             | 4               | 0                   | 0        | 4     |
| HNSCC_06 | 2             | 1               | 0                   | 0        | 3     |
| HNSCC_07 | 0             | 23              | 0                   | 1        | 24    |
| HNSCC_08 | 0             | 3               | 0                   | 2        | 5     |
| HNSCC_09 | 0             | 2               | 0                   | 1        | 3     |

926

927

928

929

930

931

932

933

934

935
