1 **RetroTest unravels LINE-1 retrotransposition in**  
2 **Head and Neck Squamous Cell Carcinoma**

3  
4 Jenifer Brea-Iglesias<sup>1,2,3#</sup>, Ana Oitabén<sup>1,2,3#</sup>, Sonia Zumalave<sup>2</sup>, Bernardo Rodriguez-  
5 Martin<sup>2,4</sup>, María Gallardo-Gómez<sup>1</sup>, Martín Santamarina<sup>2</sup>, Ana Pequeño-Valtierra<sup>2</sup>,  
6 Laura Juaneda-Magdalena<sup>1</sup>, Ramón García-Escudero<sup>5</sup>, José Luis López-Cedrún<sup>6</sup>,  
7 Máximo Fraga<sup>7</sup>, José MC Tubio<sup>2</sup>, Mónica Martínez-Fernández<sup>\*1,2</sup>

8 #Equal contribution

9  
10 1. Translational Oncology Research Group; Galicia Sur Health Research Institute  
11 (IIS Galicia Sur). SERGAS-UVIGO. Estrada de Clara Campoamor, 341, 36213 Vigo,  
12 (Spain).

13 2. Mobile Genomes Lab. Centre for Research in Molecular Medicine and Chronic  
14 Diseases (CiMUS). (Universidad de Santiago de Compostela). Avda. Barcelona 31,  
15 15706 Santiago de Compostela (Spain).

16 3. Equal contribution.

17 4. Present address: Centre for Genomic Regulation (CRG), The Barcelona Institute  
18 of Science and Technology, Barcelona (Spain). Universitat Pompeu Fabra (UPF),  
19 Barcelona (Spain).

20 5. Molecular and Translational Oncology Division, CIEMAT (ed 70A), Ave  
21 Complutense 40, 28040 Madrid (Spain). Research Institute Hospital 12 de Octubre  
22 (imas12), 28041 Madrid (Spain). Centro de Investigación Biomédica en Red de  
23 Cáncer (CIBERONC), Madrid (Spain).

24 6. Department of Maxillofacial Surgery, University Hospital of A Coruña, As Xubias,  
25 84, 15006 A Coruña (Spain).

26 7. Pathological Anatomy. Faculty of Medicine. University Clinical Hospital & Health  
27 Research Institute of Santiago de Compostela (IDIS). Travesa da Choupana s/n,  
28 15706 Santiago de Compostela (Spain).

29

30 **\*Corresponding author:** Monica Martínez Fernández.

31 [monica.martinez@iisgaliciasur.es](mailto:monica.martinez@iisgaliciasur.es) Translational Oncology. Galicia Sur Health

32 Research Institute (IIS Galicia Sur). Hospital Álvaro Cunqueiro. Estrada de Clara

33 Campoamor, 341, 36213 Vigo, (Spain).

34

35

## 36 **Highlights**

37

38 • RetroTest represents the first method to determine LINE-1  
39 retrotransposition from tumor biopsies in real clinical settings.

40 • RetroTest not only offers global LINE-1 retrotransposition ratios but also  
41 identifies the active LINE-1 source elements.

42 • RetroTest elucidates a really early LINE-1 activation in early tumor stages  
43 of Head and Neck Squamous Cell Carcinoma.

44 • Whole Genome Analysis and LINE-1 retrotransposition demonstrates  
45 processes of field cancerization in Head and Neck Squamous Cell  
46 Carcinoma.

47 • LINE-1 retrotransposition favors an earlier and more efficient Head and  
48 Neck Squamous Cell Carcinoma diagnosis.

49

## 50 **Abstract**

51 The relevant role of LINE-1 (L1) retrotransposition in cancer has been recurrently  
52 demonstrated in recent years. However, their repetitive nature hampers their  
53 identification and detection, hence remaining inaccessible for clinical practice.

54 Also, its clinical relevance for cancer patients is still limited. Here, we develop a  
55 new method to quantify L1 activation, called RetroTest, based on targeted

56 sequencing and a sophisticated bioinformatic pipeline, allowing its application in

57 tumor biopsies. First, we performed the benchmarking of the method and

58 confirmed its high specificity and reliability. Then, we unravel the L1 activation in

59 HNSCC according to a more extensive cohort including all the HNSCC tumor stages.

60 Our results confirm that RetroTest is remarkably efficient for L1 detection in

61 tumor biopsies, reaching a high sensitivity and specificity. In addition, L1

62 retrotransposition estimation reveals a surprisingly early activation in HNSCC

63 progression, contrary to its classical association with advanced tumor stages. This

64 early activation together with the genomic mutational profiling of normal adjacent

65 tissues supports field cancerization process in this tumor. These results underline  
66 the importance of estimating L1 retrotransposition in clinical practice towards an  
67 earlier and more efficient diagnosis in HNSCC.

68

69 **Keywords**

70 Retrotransposition, LINE-1, HNSCC, early diagnosis biomarker, field cancerization

71 **1. Introduction**

72 Approximately half of human genome is composed of transposable elements (TEs),  
73 sequences with the ability of moving from one place to another, changing the  
74 normal structure of the genome in the places where they are integrated [1,2].  
75 Among them, long interspersed nuclear element retrotransposons (LINE-1, L1)  
76 represent 17% of the entire DNA content with approximately 500,000 copies, most  
77 of them truncated or inactive [3–6]. Specifically, only a small subset of these L1s is  
78 active in the human genome, although they stay transcriptionally repressed due to  
79 epigenetic mechanisms that prevent the damage that their mobilization would  
80 cause [7]. When this repression is lost, L1 activation can cause different diseases,  
81 including cancer [8, 9].

82 In the framework of the International Consortium of PanCancer (PCAWG), our  
83 previous analyses shown that somatic L1 insertions represent the major  
84 restructuring source of cancer genomes, especially important for head-and-neck  
85 squamous cell carcinoma (HNSCC)[9]. Aberrant L1 retrotransposition contribute  
86 to instability within cancer genomes, promoting cancer-driving rearrangements  
87 that involve the loss of tumor-suppressor genes and/or the amplification of  
88 oncogenes, and favoring some cancer clones to survive and grow [9].

89 Despite this demonstrated impact of L1 activation in cancer genomes, the  
90 repetitive nature of L1 elements and their dispersion along the genome hinder  
91 their real activation estimates in tumor samples, preventing its translation into  
92 patient diagnosis/prognosis. This repetitive nature compels that the majority of  
93 the available detection methods are based on Whole Genome Sequencing (WGS),  
94 unfeasible for most hospitals in their diary practice, or require such good quality

95 DNA input quantities that remain unaffordable for a clinical practice mainly based  
96 on small and degraded tissue biopsies.

97 HNSCC represents the second tumor type with highest L1 activation [9], but the  
98 clinical implications of L1 retrotransposition are still to be elucidated. Head and  
99 Neck Cancer is a heterogeneous group of cancers of which more than 90% are  
100 diagnosed as HNSCC, arising in the stratified epithelium of the oral cavity, pharynx,  
101 and larynx [10,11]. Tumor development is often triggered by chronic exposure to  
102 tobacco or alcohol, while infection with high-risk human papillomaviruses (HPVs)  
103 causes a substantial and rising proportion of these tumors [12]. The lack of  
104 symptoms in the early stages together with the non-existent cancer biomarkers  
105 lead towards most diagnoses at advanced stages, where the 5-year survival rate is  
106 less than 50% [11]. Thus, there is an urgent need to find molecular biomarkers  
107 that can facilitate an earlier diagnosis and increase patients' life expectancy.

108 Based on this, we aimed to unravel the impact of possible L1 activation along  
109 HNSCC development in a clinical setting. First, we have developed a new efficient  
110 method based on L1 transductions, RetroTest, to measure L1 activation even in  
111 biopsies with low DNA inputs. Then, we have evaluated RetroTest sensitivity and  
112 specificity, demonstrating its high values. Finally, we have assessed L1  
113 retrotransposition along different tumor stages, unraveling for the first time a really  
114 early activation in HNSCC and field characterization, arising L1 as a promising  
115 early diagnostic biomarker.

116

117

## 118 **2. Materials and methods**

### 119 *2.1. Patients and tumor samples*

120 Tumor samples and medical records were analyzed in a series of 96 HNSCC  
121 patients of 3 different cohorts (*Complejo Hospitalario Universitario de A Coruña*  
122 (CHUAC), *Biobanco Vasco* and *Fundación Pública Galega de Medicina Xenómica*  
123 (FPGMX)). The Ethical Committee for Clinical Research of Santiago-Lugo approved  
124 the study (CEIC 2018/567). Fresh-frozen and FFPE HNSCC tissue biopsies were  
125 collected, and characteristics of each tumor are specified in Table 1. The  
126 histopathologic status was confirmed by each corresponding Pathology  
127 Department following the latest TNM guidelines.

128

### 129 *2.2. DNA isolation*

130 Genomic DNA (gDNA) was extracted from fresh-frozen tissue and formalin-fixed  
131 paraffin-embedded (FFPE) samples using AllPrep DNA/RNA and AllPrep FFPE  
132 DNA/RNA Mini Kits (Qiagen), respectively. DNA quantification and integrity were  
133 assessed using Qubit dsDNA BR Assay Kit in Qubit 4.0 (ThermoFisher Scientific)  
134 and a 4200 TapeStation system (Agilent).

135

### 136 *2.3. RetroTest method: design, library construction and target sequencing*

137 During L1 transcription, the processing machinery sometimes bypasses the L1  
138 polyadenylation signal until a second 3' downstream polyadenylation site,  
139 mobilizing unique sequences downstream of the element in a process called *L1 3'*  
140 *transduction*. This process has been reported to occur in around 10% of the L1  
141 mobilizations [7] and can be used as an indirect measurement of real active L1  
142 elements. Accordingly, there are three different types of retrotranspositions: solo-

143 L1 (TD0), when a partial or complete L1 is retrotransposed; partnered  
144 transductions (TD1), in which a L1 and downstream unique sequence are  
145 retrotransposed; and orphan transductions (TD2), in which only the unique  
146 sequence downstream of the active L1 is mobilized without the associated L1 [7].

147 RetroTest is based on targeted sequencing, where the capture probes are designed  
148 against the unique sequence downstream of the 124 L1 full-length competent  
149 elements previously described [7] using SureSelect design from Agilent. RetroTest  
150 identifies L1 TD2 orphan insertions through the detection of discordant reads and  
151 clipped reads. The main idea behind the method is that discordant read pairs,  
152 where one of the mates is mapped to a L1 3' downstream sequence while the other  
153 is mapped to the insertion target sequence, support an insertion. In addition,  
154 clipped reads, mapped to the target sequence but containing a discordant extreme  
155 blotting to a L1 3' downstream sequence, are detected to identify the breakpoint of  
156 the insertion (Fig. 1A). Here, a minimum size of 2 reads per cluster and a minimum  
157 of 4 supporting reads was specified to call a L1 insertion (Additional file 1).

158 Target libraries were constructed with SureSelect Target Enrichment System for  
159 Illumina Paired-End Multiplexed Sequencing (Agilent). 100 ng of gDNA from each  
160 sample were sheared using a Covaris M220 Focused-Ultrasonicator (Covaris) and  
161 libraries and capture with targeted RNA baits were performed. The multiplexed  
162 samples were sequenced with Illumina 150bp paired-end.

163 Sequencing reads were mapped to the hg19 reference genome by Burrows-  
164 Wheeler Aligner BWA-mem [13]. Samtools [14] was used to sort the aligned reads  
165 and to index the obtained bam file, applying Bammarkduplicates2 from Picard  
166 tools [15] to mark duplicated reads.

167



#### 168 *2.4. RetroTest benchmarking*

169 We generated simulated paired-end read datasets using ART [16] and several  
170 commands from MEIGA-MEIsimulator, an in-house bioinformatic tool (Additional  
171 file 1).

172 To mimic the capture process, we selected read pairs with at least one of the mates  
173 mapping on a given set of target regions with Picard FilterSamReads v2.18.14 [15].

174 We used the resulting bam files to assess sensitivity and specificity under different  
175 conditions. To test how our method performs with subclonal events, we simulated  
176 transductions at different VAFs (10%, 20%, 40% and 50%). We also studied how  
177 coverage affects the detection power of our algorithm. Using Picard  
178 DownSampleSam v2.18.14 [15], we subsampled reads from a 150x simulation at  
179 50% VAF under different sequencing depths (15x, 30x, 60x, 90x, 120x and 150x).

180 We compared RetroTest performance with Transposon Finder in Cancer (TraFiC),  
181 used previously to explore somatic retrotransposition in PCAWG [7]. Both were  
182 used to call the simulated events. Precision was calculated dividing the number of  
183 true positive calls by the number of total calls performed by the method. Recall  
184 was calculated dividing the number of true positive calls by the number of total  
185 simulated events. True positives, False positives and False negatives were  
186 identified by intersecting the coordinates of simulated events with the coordinates  
187 of the calls using BEDTools intersect [17]. To compare RetroTest and TraFiC  
188 results, Venn diagrams with the insertions detected by each method were plotted  
189 by using *vennDiagram* R package.

190

#### 191 *2.5. Whole Genome Sequencing and determination of mutation profile.*

192 To obtain WGS data, DNA was sent to an external service (Macrogen). Truseq Nano  
193 DNA Libraries (350bp) were constructed and sequenced in a NovaSeq6000  
194 Illumina platform (150bp paired-end). For a detailed explanation see Additional  
195 File 1.

196

### 197 *2.6. Statistical analyses*

198 The association between L1 transduction rate (corrected by coverage) and patient  
199 clinical features was assessed by multiple linear regressions. Wilcoxon or Fisher  
200 test, depending on sample size, were applied to compare the differences in mean  
201 values for clinical variables. Overall survival (OS), progression free survival (PFS)  
202 and survival probability analyses were performed with the *survminer* and *survival*  
203 R packages, using log-rank test to compare different groups. The association  
204 between survival and clinical variables was evaluated by Cox regression.

205

### 206 *2.7. Enrichment analysis*

207 All enrichment analyses were performed using *enrichR* R package [18]. The  
208 complete list of pathways databases can be found in Additional File 1.

209

210

## 211 3. Results

### 212 3.1. RetroTest Benchmarking

213 During L1 transcription, transductions are reported to occur in around 10% of the  
214 L1 mobilizations [7], moving also unique sequences downstream of the source  
215 element. RetroTest is designed to capture these mobilized and downstream-  
216 transduced unique sequences from orphan transductions (TD2) and use them as  
217 barcodes (Fig. 1A). These barcodes can identify unequivocally the insertions  
218 caused by these 124 L1 source elements active in cancer [7,9]. With this aim, we  
219 focused RetroTest probe design on the first 5000 nucleotides adjacent to the L1 3'  
220 regions for each of the 124 L1 source elements, since these are the regions most  
221 frequently transduced [7]. Since RetroTest uses transductions as an indirect  
222 measure of real L1 activation, we first compared L1 activation *versus* TD2 using the  
223 whole PCAWG data. In this way, we confirmed a high and statistically significant  
224 correlation between both events ( $r=0.88$ ,  $p=2.2e^{-16}$ ), and a relation of 1:10 as  
225 previously described (Fig. 1B).

226 Next, we optimized the lab protocol for both FFPE and fresh-frozen tissues and  
227 developed an associated bioinformatic pipeline. We evaluated the performance  
228 and accuracy of RetroTest in detecting L1 activation by generating an artificial  
229 cancer genome. In this genome, we have randomly distributed a total of 2480 L1  
230 transductions. Using simulations, we assessed the performance of RetroTest for  
231 different sequencing depth: 15x, 30x, 60x, 90x, 120x and 150x. RetroTest obtained  
232 a precision around 0.99 in all cases and a recall around 0.96 (Fig. 1C). We also  
233 evaluated the variation of the performance depending on the variant allele  
234 frequency (VAF) of the integrations, precisely for the following VAFs: 10%, 20%,  
235 40% and 50%. In this case, RetroTest obtained a precision around 1, decreasing

236 for lower VAFs, and a recall ranged from 0.81 to 0.96, augmenting as increasing the  
237 VAF (Fig. 1D).

238 Then, we compared RetroTest and the classical TraFiC, used for WGS in PCAWG  
239 [7]. As TraFiC is designed to work only with standard WGS 30x data, we compared  
240 the analysis varying exclusively the VAFs. TraFiC precision ranged from 0.99 to  
241 0.88 and recall ranged from 0.11 to 0.87 as VAF increased (although the maximum  
242 recall was obtained for VAFs of 40%, being 0.87) (Fig. 1E) (Additional File 2: Table  
243 S1). We compared the performance of both methods by intersecting both calls in  
244 the mock tumor genome. Using a VAF of 50%, most of the variants were called by  
245 both methods, concretely 2216 variants, while RetroTest exclusively called 167,  
246 and TraFiC 33 private events, most of them resulting in false positives according to  
247 IGV (Fig. 1F).

248

### 249 *3.2. L1 activation in HNSCC*

250 Once confirmed the accuracy and precision of RetroTest, we decided to apply it to  
251 a more extensive HNSCC cohort, composed of 96 tumors along the tumor stages,  
252 from T1 to T4 (Table 1). We detected L1 activation in 75% of the patients (Fig. 2A),  
253 out of which 48.6% showed high activity (beyond the median) (Table 2). When the  
254 activation was studied along the different tumor stages of the disease, advanced  
255 disease (T3-T4) showed statistically higher L1 activation compared with early  
256 stages (T1-T2) ( $p=0.0072$ ) (Fig. 2B). Following tumor staging, L1 activation was  
257 detected in 62.5% of T1 tumors, 63.1% of T2 tumors, 94.4% of T3 tumors, and  
258 73.5% of the tumors in T4 (Table 2). The detection of L1 activation in all the tumor  
259 stages among the different patients, even in the first stage of the disease (T1),  
260 supports an early L1 activation during tumor progression.

261 Then, we analyzed L1 activation considering different patients' clinical  
262 characteristics, finding no statistically significant association between the L1  
263 activation and alcohol consumption ( $p=0.14$ ) or sex ( $p=0.055$ ). Interestingly,  
264 smoker patients showed statistically significantly higher L1 activity than non-  
265 smokers ( $p=0.0015$ ) (Fig. 2C). We did not find an association between L1  
266 activation and survival probability ( $p=0.59$  active vs. inactive,  $p=0.49$  high vs. low  
267 rate) (Additional File 3: Fig. S1), although when considering those T1 patients who  
268 have L1 already active at early stages, Kaplan-Meier curve showed that they tend  
269 to have a lower survival probability, not being statistically significant ( $p=0.43$ )  
270 (Fig. 2D).

271 Finally, in addition to localizing the position of each transduction, RetroTest can  
272 also identify the source L1 element that has been mobilized. Thus, we have  
273 detected L1 transductions in 23 genes throughout 27 patients. As shown in Fig. 2E,  
274 most of these insertions are caused by a few source elements that resulted very  
275 active in HNSCC, especially the 22q12.1.

276

### 277 *3.3. HNSCC mutation profile and L1 activation*

278 To further characterize the molecular profile of L1 activation in our HNSCC cohort,  
279 we obtained WGS data from 19 tumor samples from patients measured by  
280 RetroTest. To detect only somatic variation, their corresponding paired-normal  
281 samples were included as germline control. We detected a median of 40 single  
282 nucleotide variants (SNVs) and INDELS, identifying a total of 1012 somatic variants  
283 throughout the cohort, affecting 918 genes (Additional File 2: Table S2). As shown  
284 in Fig. 3A, we did not detect a correlation between L1 activation and the general  
285 tumor mutation burden (TMB). Our results showed that the most frequently

286 mutated gene was *TP53* (36.8%), followed by *NOTCH1* (26.3%), *MT-ND5* (26.3%),  
287 *FAT1*, and *GRIN2A* (21.1%). Interestingly, we found that most of the patients with  
288 *TP53* mutations showed also high L1 activity (71.4%). In fact, when we compared  
289 the L1 activation with the *TP53* mutation, we found a clear association ( $p=0.056$ )  
290 (Fig. 3B). Enrichment analyses with the mutated genes showed involved key  
291 processes for cancer progression such as *Notch signaling*, *TGF $\beta$  signaling*, and  
292 again *p53 activity regulation* (Fig. 3C) (Additional File 2: Table S3). CHEA analysis  
293 revealed the alteration of transcription factors related to epigenetic mechanisms  
294 including Polycomb members (*EZH2*, *SUZ12*) (Fig. 3D) (Additional File 2: Table S4).

295

#### 296 3.4. Profiling normal adjacent tissues to the HNSCC tumor (NAT)

297 To further understand the early HNSCC features, we decided to evaluate a possible  
298 field cancerization process, in which the normal cell population is replaced by  
299 cancer-primed cells, without anatomical or morphological changes, but being  
300 already premalignant at molecular level. To this, we analyzed the available normal  
301 samples obtained from adjacent tissues to the tumor and the peripheral blood  
302 mononuclear cells (PBMCs), used as germline control (Fig. 4A). We detected a total  
303 of 25 high impact and/or possibly pathogenic somatic variants affecting the NAT  
304 (Additional File 2: Table S5). Most of these specific mutations ( $n=20$ ; 80%) were  
305 exclusive from NAT tissue, including those affecting key genes such as *NOTCH1*  
306 (the most mutated gene), *FAT1* or *PPARD*; while 20% were shared between NAT  
307 and tumor tissue, affecting genes such as *CDKN2A*.

308 To elucidate whether L1 further supports field cancerization, we evaluated the  
309 NAT of a total of 9 patients by RetroTest. We compared the L1 elements active in  
310 the tumor, in the NAT, and in their corresponding paired germline. In this way, we

311 could confirm that most of the L1 activation was present only in the tumor, 5  
312 insertions resulted germline, and 1 element appeared active and shared by tumor  
313 and NAT. Surprisingly, 4 insertions appeared exclusively in NAT (Fig. 4B). Thus, we  
314 could confirm field cancerization and demonstrate that L1 is already active in NAT,  
315 supporting once again its early activation in HNSCC.

316

#### 317 **4. Discussion**

318 Since the recently demonstrated high impact of L1 in cancer genomes [7,9], L1 has  
319 been evaluated as a cancer biomarker in different studies assessing its activity by  
320 evaluating L1 methylation, RNA expression, or protein levels [19–22]. However,  
321 most of L1 genome sequences are truncated and not functional, so results can  
322 present important biases in their L1 estimations, while its translation into clinical  
323 routine can be challenging due to RNA/protein instability. Previous proposed  
324 technologies based on DNA full-length L1 retrotransposon capture sequencing,  
325 such as RC-seq [23], present the associated possible bias of the real L1 activation,  
326 besides only offer global L1 estimates, and important DNA requirements (2.5µg  
327 starting genomic DNA), unaffordable for clinical practice. The most recent  
328 approaches are based on the identification of L1 insertions as real L1 activation  
329 measure (TraFiC [7], xTea [24], MELT [25] and Mobster [26]). They use Whole  
330 Genome or Whole Exome Sequencing from Illumina pair-end short reads,  
331 nevertheless, short reads hamper the detection of transposable elements  
332 insertions in highly repetitive or complex rearrangement regions. Additionally,  
333 these high throughput approaches are not affordable for most of the hospitals.  
334 More recently, long reads sequencing has arisen as a new possibility (xTea [24],  
335 PALMER [27]), but again their requirements of huge amounts of high-quality DNA

336 remain unaffordable for biopsies mainly composed of small samples and  
337 fragmented DNA. Thus, incorporating L1 activation into the clinical practice  
338 requires new methods supported by standardization and rigorous validation to  
339 demonstrate its utility.

340 Here, we present RetroTest: a new method to detect real L1 activation in clinical  
341 samples with low DNA input requirements, both from fresh/frozen or FFPE  
342 biopsies. Its novelty and power lie in the targeted detection of active source L1  
343 elements, which showed a highly and direct statistical correlation with total L1  
344 activity (as demonstrated by our data) in a more cost-effective than previously  
345 proposed approaches. Our method not only offers global L1 estimates but also  
346 identifies the L1 elements active in each real sample. Our benchmarking supports  
347 the high precision (1) and recall of RetroTest (0.81-0.96), improving according to  
348 coverage, even reaching the possibility of detecting subclonal insertions. The high  
349 coincidence in the variants called by TraFic and RetroTest, in both simulations and  
350 real-world data, supports the high potential for this new methodology.

351 L1 somatic retrotransposition was previously demonstrated as the second most  
352 frequent type of structural variants among HNSCC genomes [9]. Accordingly, our  
353 results demonstrate that most HNSCC patients (75%) present L1 activation, even  
354 near half of them with high levels (49%). The activation was higher in late stages,  
355 as found in Barret's esophagus, where lower L1 activity was detected in the early  
356 stages increasing with cancer progression [28]. Interestingly, we found a  
357 surprisingly early activation already in the first stages of HNSCC, with activation of  
358 L1 in 62-63% of the T1 patients. These data pointed towards L1 activation as an  
359 early event in the configuration of HNSCC genomes and, thus, in the development



360 of the disease. In fact, those stage T1 patients with L1 activation tended to present  
361 a lower OS.

362 We found an association between high L1 activity and smoking habits. Previous  
363 studies had reported higher hypomethylation rates of L1 in smokers [29], even in  
364 non-cancerous epithelial tissues [30]. Considering that around 75% of HNSCC are  
365 associated with tobacco [31], this mechanism could be responsible for the high L1  
366 activity levels in HNSCC, since methylation is one of the best-demonstrated  
367 mechanisms preventing L1 reactivation [7,32]. In fact, L1 hypomethylation has  
368 been associated with worse prognosis in HNSCC, including a higher risk of relapse  
369 [33–35]. This hypomethylation has been found as an early event in CRC, gastric  
370 and oral cancer [36–39]. Interestingly, it was reported that L1 methylation levels  
371 were significantly lower in oral premalignant lesions of patients who then  
372 developed oral cancer [39].

373 The source element L1 most active in our cohort was that at 22q12.1, coincident  
374 with our previous results [7, 10]. This L1 is located antisense to an intron of the  
375 TTC28 gene and has been also recently identified as the intact LINE-1 mRNA most  
376 highly expressed in breast, ovarian and colon cancer [40], and the L1 element  
377 accounting for most transductions in colorectal cancer [33], supporting the same  
378 hottest activity in HNSCC.

379 Our WGS analyses confirmed no correlation between L1 activity and TMB, but an  
380 association between *TP53* mutation and L1 activation, in line with previous studies  
381 suggesting that *TP53* can repress L1 mobilization [9,40–43]. We also identified an  
382 important epigenetic regulation among the transcription factors strongly  
383 interacting with the mutated genes, specially related to repressive complex  
384 Polycomb. Intriguingly, Mangoni et al. have just deciphered that L1 RNAs can act as

385 long non-coding RNAs and directly interact with the Polycomb during brain  
386 development and evolution [44]. We also reported previously that Polycomb could  
387 regulate lncRNA *HOTAIR* in bladder cancer [45]. In the same sense, Ishak et al.  
388 demonstrated an EZH2-dependent silencing of genomic repeat sequences,  
389 including L1 elements [46]. Therefore, additional analyses would be required to  
390 further address if this epigenetic network plays a role in cancer genome  
391 reorganization.

392 Then, to evaluate possible HNSCC early diagnosis potential biomarkers is  
393 fundamental to get insights into the transition from pre-tumoral to cancer disease.  
394 Thus, we evaluated the presence of field cancerization and identified genetic  
395 features that can eventually lead to cancer development [47], finding exclusive  
396 somatic mutations in the NAT and a small proportion shared with the tumor.  
397 Several studies have recently described patchworks of different clones in normal  
398 tissues, some of them even bearing driver mutations, increasing with age or  
399 smoking habits [48–50]. We found *NOTCH1* and *FAT1* as the most mutated genes,  
400 as Martincorena's results in normal skin and esophagus [48,51]. These genes  
401 showed also high mutation rates in the tumor, indicating the presence of a  
402 precancerous or cancer invasion field.

403 Finally, when we evaluated L1 activity, several mobilizations were exclusively  
404 found in NAT, and only one appeared shared with the tumor, again supporting a  
405 cancerization field. Somatic L1 retrotransposition events have been recently  
406 described in normal urothelium and colorectal epithelium, although with much  
407 lower rates than in bladder and colorectal cancer [52,53]. L1 activity has been also  
408 described in a few pre-tumor samples including Barrett's esophagus and colorectal  
409 adenomas [8,28,54]. Therefore, L1 activation arises as a reinforced early event,

410 even in pre-tumor stages, in the natural history of HNSCC, with the associated  
411 potential of L1 as a field cancerization biomarker.

412

### 413 **Conclusions**

414 We present the development and benchmarking of RetroTest, which allows an  
415 easy measurement of real L1 activation from small tumor biopsies with high  
416 efficacy, favoring its implementation in real clinical settings. RetroTest revealed  
417 that most of the HNSCC patients present L1 activation, associated with smoking  
418 habits and already active in early stages of the disease and NAT, supporting a field  
419 cancerization process and its potential as early diagnostic biomarker.

420

### 421 **Acknowledgements**

422 Authors thank all the enrolled patients and their families. This research project  
423 was made possible through the access granted by the Galician Supercomputing  
424 Center (CESGA) to its supercomputing infrastructure. The supercomputer  
425 FinisTerra III and its permanent data storage system have been funded by the  
426 Spanish Ministry of Science and Innovation, the Galician Government and the  
427 European Regional Development Fund (ERDF).

428 This work was supported by the Instituto de Salud Carlos III (ISCIII) and the  
429 European Social Fund (“Investing in your future”) (PI19/01113, and partially  
430 by P121/00208, co-funded by FEDER and the European Union), and the Spanish  
431 Association Against Cancer Scientific Foundation (IDEAS19122MART). A.O. was  
432 supported by a predoctoral fellowship from the Galician Innovation Agency, Xunta  
433 de Galicia (ED481A-2020/214). M.M.-F. and J.B. were previously supported by the  
434 Spanish Association Against Cancer Scientific Foundation (INVES207MART and

435 PRDCR19007BREA\_001, respectively). M.M.-F. is currently supported by the  
436 Miguel Servet program (CP20/00188) from the Instituto de Salud Carlos III (ISCIII)  
437 and the European Social Fund (“Investing in your future”). M.G.-G. is supported by a  
438 postdoctoral fellowship from the Galician Innovation Agency, Xunta de Galicia  
439 (IN606B-2024/014).

440

#### 441 **Ethics statement**

442 The Ethical Committee for Clinical Research of Santiago-Lugo gave ethical approval  
443 for this work (CEIC 2018/567).

444

#### 445 **Competing interests**

446 The authors declare no competing interests.

447

#### 448 **Consent for publication**

449 All authors give consent for the publication of this manuscript.

450

#### 451 **Data availability statement**

452 Whole Genome Sequencing data from the HNSCC cohort is deposited into the  
453 Sequence Read Archive (SRA) repository under the following BioProject ID:  
454 PRJNA1053897. RetroTest pipeline is publicly available at  
455 <https://gitlab.com/mobilegenomesgroup/RETROTEST>.

456

#### 457 **CRedit authorship contribution statement**

458 **Jenifer Brea-Iglesias and Ana Oitabén:** Conceptualization, Methodology,  
459 Software, Data curation, Investigation, Validation, Visualization, Writing – review

460 and editing. **Sonia Zumalave:** Conceptualization, Investigation, Methodology,  
461 Software, Validation, Writing – review and editing. **Bernardo Rodríguez-Martin:**  
462 Conceptualization, Methodology, Software. **María Gallardo-Gómez:**  
463 Conceptualization, Visualization, Writing – review and editing. **Martin**  
464 **Santamarina:** Methodology, Validation. **Ana Pequeño-Valtierra:**  
465 Conceptualization, Investigation. **Laura Juaneda-Magdalena:** Methodology,  
466 Conceptualization, Writing - review and editing. **Ramón García-Escudero:**  
467 Methodology, Writing - review and editing. **Jose Luis López-Cedrún:**  
468 Methodology. **Máximo Fraga:** Funding acquisition. **José MC Tubio:**  
469 Conceptualization, Funding acquisition. **Mónica Martínez-Fernández:** Writing –  
470 review & editing, Writing – original draft, Supervision, Resources, Investigation,  
471 Project administration, Funding acquisition, Conceptualization. All authors  
472 approved the final version.

473

#### 474 **References**

- 475 [1] H.H. Kazazian, J. V. Moran, The impact of L1 retrotransposons on the human  
476 genome, *Nat. Genet.* 19 (1998) 19–24. <https://doi.org/10.1038/NG0598-19>.
- 477 [2] E.S. Lander, L.M. Linton, B. Birren, C. Nusbaum, M.C. Zody, J. Baldwin, K.  
478 Devon, K. Dewar, M. Doyle, W. Fitzhugh, R. Funke, D. Gage, K. Harris, A.  
479 Heaford, J. Howland, L. Kann, J. Lehoczky, R. Levine, P. McEwan, K.  
480 McKernan, J. Meldrim, J.P. Mesirov, C. Miranda, W. Morris, J. Naylor, C.  
481 Raymond, M. Rosetti, R. Santos, A. Sheridan, C. Sougnez, N. Stange-Thomann,  
482 N. Stojanovic, A. Subramanian, D. Wyman, J. Rogers, J. Sulston, R. Ainscough,  
483 S. Beck, D. Bentley, J. Burton, C. Clee, N. Carter, A. Coulson, R. Deadman, P.  
484 Deloukas, A. Dunham, I. Dunham, R. Durbin, L. French, D. Grafham, S.

485 Gregory, T. Hubbard, S. Humphray, A. Hunt, M. Jones, C. Lloyd, A. McMurray,  
486 L. Matthews, S. Mercer, S. Milne, J.C. Mullikin, A. Mungall, R. Plumb, M. Ross,  
487 R. Shownkeen, S. Sims, R.H. Waterston, R.K. Wilson, L.W. Hillier, J.D.  
488 McPherson, M.A. Marra, E.R. Mardis, L.A. Fulton, A.T. Chinwalla, K.H. Pepin,  
489 W.R. Gish, S.L. Chissoe, M.C. Wendl, K.D. Delehaunty, T.L. Miner, A.  
490 Delehaunty, J.B. Kramer, L.L. Cook, R.S. Fulton, D.L. Johnson, P.J. Minx, S.W.  
491 Clifton, T. Hawkins, E. Branscomb, P. Predki, P. Richardson, S. Wenning, T.  
492 Slezak, N. Doggett, J.F. Cheng, A. Olsen, S. Lucas, C. Elkin, E. Uberbacher, M.  
493 Frazier, R.A. Gibbs, D.M. Muzny, S.E. Scherer, J.B. Bouck, E.J. Sodergren, K.C.  
494 Worley, C.M. Rives, J.H. Gorrell, M.L. Metzker, S.L. Naylor, R.S. Kucherlapati,  
495 D.L. Nelson, G.M. Weinstock, Y. Sakaki, A. Fujiyama, M. Hattori, T. Yada, A.  
496 Toyoda, T. Itoh, C. Kawagoe, H. Watanabe, Y. Totoki, T. Taylor, J.  
497 Weissenbach, R. Heilig, W. Saurin, F. Artiguenave, P. Brottier, T. Bruls, E.  
498 Pelletier, C. Robert, P. Wincker, A. Rosenthal, M. Platzer, G. Nyakatura, S.  
499 Taudien, A. Rump, D.R. Smith, L. Doucette-Stamm, M. Rubenfield, K.  
500 Weinstock, M.L. Hong, J. Dubois, H. Yang, J. Yu, J. Wang, G. Huang, J. Gu, L.  
501 Hood, L. Rowen, A. Madan, S. Qin, R.W. Davis, N.A. Federspiel, A.P. Abola, M.J.  
502 Proctor, B.A. Roe, F. Chen, H. Pan, J. Ramser, H. Lehrach, R. Reinhardt, W.R.  
503 McCombie, M. De La Bastide, N. Dedhia, H. Blöcker, K. Hornischer, G.  
504 Nordsiek, R. Agarwala, L. Aravind, J.A. Bailey, A. Bateman, S. Batzoglou, E.  
505 Birney, P. Bork, D.G. Brown, C.B. Burge, L. Cerutti, H.C. Chen, D. Church, M.  
506 Clamp, R.R. Copley, T. Doerks, S.R. Eddy, E.E. Eichler, T.S. Furey, J. Galagan,  
507 J.G.R. Gilbert, C. Harmon, Y. Hayashizaki, D. Haussler, H. Hermjakob, K.  
508 Hokamp, W. Jang, L.S. Johnson, T.A. Jones, S. Kasif, A. Kasprzyk, S. Kennedy,  
509 W.J. Kent, P. Kitts, E. V. Koonin, I. Korf, D. Kulp, D. Lancet, T.M. Lowe, A.

- 510 McLysaght, T. Mikkelsen, J. V. Moran, N. Mulder, V.J. Pollara, C.P. Ponting, G.  
511 Schuler, J. Schultz, G. Slater, A.F.A. Smit, E. Stupka, J. Szustakowki, D. Thierry-  
512 Mieg, J. Thierry-Mieg, L. Wagner, J. Wallis, R. Wheeler, A. Williams, Y.I. Wolf,  
513 K.H. Wolfe, S.P. Yang, R.F. Yeh, F. Collins, M.S. Guyer, J. Peterson, A.  
514 Felsenfeld, K.A. Wetterstrand, R.M. Myers, J. Schmutz, M. Dickson, J.  
515 Grimwood, D.R. Cox, M. V. Olson, R. Kaul, C. Raymond, N. Shimizu, K.  
516 Kawasaki, S. Minoshima, G.A. Evans, M. Athanasiou, R. Schultz, A. Patrinos,  
517 M.J. Morgan, Initial sequencing and analysis of the human genome, Nature  
518 409 (2001) 860–921. <https://doi.org/10.1038/35057062>.
- 519 [3] C.R. Beck, P. Collier, C. Macfarlane, M. Malig, J.M. Kidd, E.E. Eichler, R.M.  
520 Badge, J. V. Moran, LINE-1 retrotransposition activity in human genomes,  
521 Cell 141 (2010) 1159–1170.
- 522 [4] B. Brouha, J. Schustak, R.M. Badge, S. Lutz-Prigge, A.H. Farley, J. V. Morant,  
523 H.H. Kazazian, Hot L1s account for the bulk of retrotransposition in the  
524 human population, Proc. Natl. Acad. Sci. U. S. A. 100 (2003) 5280–5285.
- 525 [5] S.J. Hoyt, J.M. Storer, G.A. Hartley, P.G.S. Grady, A. Gershman, L.G. de Lima, C.  
526 Limouse, R. Halabian, L. Wojenski, M. Rodriguez, N. Altemose, A. Rhie, L.J.  
527 Core, J.L. Gerton, W. Makalowski, D. Olson, J. Rosen, A.F.A. Smit, A.F. Straight,  
528 M.R. Vollger, T.J. Wheeler, M.C. Schatz, E.E. Eichler, A.M. Phillippy, W. Timp,  
529 K.H. Miga, R.J. O’Neill, From telomere to telomere: The transcriptional and  
530 epigenetic state of human repeat elements, Science. 376 (2022).  
531 <https://doi.org/10.1126/science.abk3112>.
- 532 [6] D.M. Sassaman, B.A. Dombroski, J. V. Moran, M.L. Kimberland, T.P. Naas, R.J.  
533 DeBerardinis, A. Gabriel, G.D. Swergold, H.H. Kazazian, Many human L1  
534 elements are capable of retrotransposition, Nat. Genet. 16 (1997) 37–43.

- 535 [7] J.M.C. e. al Tubio, Extensive transduction of nonrepetitive DNA mediated by  
536 L1retrotransposition in cancer genomes, *Science*. 345 (2014) 1251343.  
537 <https://doi.org/10.1126/science.1251343>.Extensive.
- 538 [8] A.D. Ewing, A. Gacita, L.D. Wood, F. Ma, D. Xing, M.S. Kim, S.S. Manda, G. Abril,  
539 G. Pereira, A. Makohon-Moore, L.H.J. Looijenga, A.J.M. Gillis, R.H. Hruban, R.A.  
540 Anders, K.E. Romans, A. Pandey, C.A. Iacobuzio-Donahue, B. Vogelstein, K.W.  
541 Kinzler, H.H. Kazazian, S. Solyom, Widespread somatic L1 retrotransposition  
542 occurs early during gastrointestinal cancer evolution, *Genome Res*. 25  
543 (2015) 1536–1545. <https://doi.org/10.1101/gr.196238.115>.
- 544 [9] B. Rodriguez-Martin, E.G. Alvarez, A. Baez-Ortega, J. Zamora, F. Supek, J.  
545 Demeulemeester, M. Santamarina, Y.S. Ju, J. Temes, D. Garcia-Souto, H.  
546 Detering, Y. Li, J. Rodriguez-Castro, A. Dueso-Barroso, A.L. Bruzos, S.C.  
547 Dentro, M.G. Blanco, G. Contino, D. Ardeljan, M. Tojo, N.D. Roberts, S.  
548 Zumalave, P.A.W. Edwards, J. Weischenfeldt, M. Puiggròs, Z. Chong, K. Chen,  
549 E.A. Lee, J.A. Wala, K. Raine, A. Butler, S.M. Waszak, F.C.P. Navarro, S.E.  
550 Schumacher, J. Monlong, F. Maura, N. Bolli, G. Bourque, M. Gerstein, P.J. Park,  
551 D.C. Wedge, R. Beroukhim, D. Torrents, J.O. Korbel, I.I. Martincorena, R.C.  
552 Fitzgerald, P. Van Loo, H.H. Kazazian, K.H. Burns, K.C. Akdemir, E.G. Alvarez,  
553 A. Baez-Ortega, R. Beroukhim, P.C. Boutros, D.D.L. Bowtell, B. Brors, K.H.  
554 Burns, P.J. Campbell, K. Chan, I. Cortés-Ciriano, A. Dueso-Barroso, A.J.  
555 Dunford, P.A.W. Edwards, X. Estivill, D. Etemadmoghadam, L. Feuerbach, J.L.  
556 Fink, M. Frenkel-Morgenstern, D.W. Garsed, M. Gerstein, D.A. Gordenin, D.  
557 Haan, J.E. Haber, J.M. Hess, B. Hutter, M. Imielinski, D.T.W. Jones, M.D.  
558 Kazanov, L.J. Klimczak, Y. Koh, J.O. Korbel, K. Kumar, E.A. Lee, J.J.K. Lee, Y. Li,  
559 A.G. Lynch, G. Macintyre, F. Markowetz, A. Martinez-Fundichely, M.



560 Meyerson, S. Miyano, H. Nakagawa, F.C.P. Navarro, S. Ossowski, J. V. Pearson,  
561 J. V. Pearson, K. Rippe, N.D. Roberts, S.A. Roberts, B. Rodriguez-Martin, B.  
562 Rodriguez-Martin, S.E. Schumacher, M. Shackleton, N. Sidiropoulos, L.  
563 Sieverling, C. Stewart, J.M.C. Tubio, I. Villasante, N. Waddell, J.A. Wala, J.  
564 Weischenfeldt, L. Yang, X. Yao, S.S. Yoon, J. Zamora, C.Z. Zhang, P.J. Campbell,  
565 J.M.C. Tubio, S.E. Schumacher, R. Scully, B. Rodriguez-Martin, Y.S. Ju, M.D.  
566 Kazanov, L.J. Klimczak, Y. Koh, J.O. Korbel, K. Kumar, E.A. Lee, J.J.K. Lee, Y. Li,  
567 A.G. Lynch, G. Macintyre, F. Markowetz, I.I. Martincorena, A. Martinez-  
568 Fundichely, M. Meyerson, S. Miyano, H. Nakagawa, F.C.P. Navarro, S.  
569 Ossowski, J. V. Pearson, M. Puiggròs, K. Rippe, N.D. Roberts, S.A. Roberts, B.  
570 Rodriguez-Martin, S.E. Schumacher, R. Scully, M. Shackleton, N. Sidiropoulos,  
571 L. Sieverling, C. Stewart, J.M.C. Tubio, I. Villasante, N. Waddell, J.A. Wala, J.  
572 Weischenfeldt, L. Yang, X. Yao, S.S. Yoon, J. Zamora, C.Z. Zhang, P.J. Campbell,  
573 J.M.C. Tubio, Pan-cancer analysis of whole genomes identifies driver  
574 rearrangements promoted by LINE-1 retrotransposition, *Nat. Genet.* 52  
575 (2020) 306–319. <https://doi.org/10.1038/s41588-019-0562-0>.  
576 [10] A. Jou, J. Hess, *Epidemiology and Molecular Biology of Head and Neck*  
577 *Cancer, Oncol. Res. Treat.* 40 (2017) 328–332.  
578 <https://doi.org/10.1159/000477127>.  
579 [11] M. Plath, J. Gass, M. Hlevnjak, Q. Li, B. Feng, X.P. Hostench, M. Bieg, L.  
580 Schroeder, D. Holzinger, M. Zapatka, K. Freier, W. Weichert, J. Hess, K. Zaoui,  
581 Unraveling most abundant mutational signatures in head and neck cancer,  
582 *Int. J. Cancer* 148 (2021) 115–127. <https://doi.org/10.1002/IJC.33297>.  
583 [12] C.R. Leemans, B.J.M. Braakhuis, R.H. Brakenhoff, The molecular biology of  
584 head and neck cancer, *Nat. Rev. Cancer* 11 (2011) 9–22.

- 585 <https://doi.org/10.1038/nrc2982>.
- 586 [13] H. Li, Aligning sequence reads, clone sequences and assembly contigs with  
587 BWA-MEM, ArXiv: Genomics (2013).  
588 <https://doi.org/10.6084/M9.FIGSHARE.963153.V1>.
- 589 [14] P. Danecek, J.K. Bonfield, J. Liddle, J. Marshall, V. Ohan, M.O. Pollard, A.  
590 Whitwham, T. Keane, S.A. McCarthy, R.M. Davies, Twelve years of SAMtools  
591 and BCFtools, Gigascience 10 (2021) 1–4.  
592 <https://doi.org/10.1093/GIGASCIENCE/GIAB008>.
- 593 [15] Broad Institute, Picard Tools, [Http://Broadinstitute.Github.io/Picard/](http://Broadinstitute.Github.io/Picard/) (n.d.).
- 594 [16] W. Huang, L. Li, J.R. Myers, G.T. Marth, ART: a next-generation sequencing  
595 read simulator, Bioinformatics 28 (2012) 593–594.  
596 <https://doi.org/10.1093/BIOINFORMATICS/BTR708>.
- 597 [17] A.R. Quinlan, I.M. Hall, BEDTools: a flexible suite of utilities for comparing  
598 genomic features, Bioinformatics 26 (2010) 841–842.  
599 <https://doi.org/10.1093/BIOINFORMATICS/BTQ033>.
- 600 [18] M. V. Kuleshov, M.R. Jones, A.D. Rouillard, N.F. Fernandez, Q. Duan, Z. Wang,  
601 S. Koplev, S.L. Jenkins, K.M. Jagodnik, A. Lachmann, M.G. McDermott, C.D.  
602 Monteiro, G.W. Gundersen, A. Maayan, Enrichr: a comprehensive gene set  
603 enrichment analysis web server 2016 update, Nucleic Acids Res. 44 (2016)  
604 W90–W97. <https://doi.org/10.1093/NAR/GKW377>.
- 605 [19] D. Ardeljan, M.S. Taylor, D.T. Ting, K.H. Burns, The Human Long Interspersed  
606 Element-1 Retrotransposon: An Emerging Biomarker of Neoplasia, Clin.  
607 Chem. 63 (2017) 816–822.  
608 <https://doi.org/10.1373/CLINCHEM.2016.257444>.
- 609 [20] M.L. Filipenko, U.A. Boyarskikh, L.S. Leskov, K. V. Subbotina, E.A. Khrapov, A.

- 610 V. Sokolov, I.S. Stilidi, N.E. Kushlinskii, The Level of LINE-1 mRNA Is  
611 Increased in Extracellular Circulating Plasma RNA in Patients with  
612 Colorectal Cancer, *Bull. Exp. Biol. Med.* 173 (2022) 261–264.  
613 <https://doi.org/10.1007/S10517-022-05530-2>/METRICS.
- 614 [21] S. Sato, M. Gillette, P.R. de Santiago, E. Kuhn, M. Burgess, K. Doucette, Y. Feng,  
615 C. Mendez-Dorantes, P.J. Ippoliti, S. Hobday, M.A. Mitchell, K. Doberstein, S.M.  
616 Gysler, M.S. Hirsch, L. Schwartz, M.J. Birrer, S.J. Skates, K.H. Burns, S.A. Carr,  
617 R. Drapkin, LINE-1 ORF1p as a candidate biomarker in high grade serous  
618 ovarian carcinoma, *Sci. Rep.* 13 (2023). [https://doi.org/10.1038/s41598-](https://doi.org/10.1038/s41598-023-28840-5)  
619 [023-28840-5](https://doi.org/10.1038/s41598-023-28840-5).
- 620 [22] M.S. Taylor, C. Wu, P.C. Fridy, S.J. Zhang, Y. Senussi, J.C. Wolters, T. Cajuso, W.-  
621 C. Cheng, J.D. Heaps, B.D. Miller, K. Mori, L. Cohen, H. Jiang, K.R. Molloy, B.T.  
622 Chait, M.G. Goggins, I. Bhan, J.W. Franses, X. Yang, M.-E. Taplin, X. Wang, D.C.  
623 Christiani, B.E. Johnson, M. Meyerson, R. Uppaluri, A.M. Egloff, E.N. Denault,  
624 L.M. Spring, T.-L. Wang, I.-M. Shih, J.E. Fairman, E. Jung, K.S. Arora, O.H.  
625 Yilmaz, S. Cohen, T. Sharova, G. Chi, B.L. Norden, Y. Song, L.T. Nieman, L.  
626 Pappas, A.R. Parikh, M.R. Strickland, R.B. Corcoran, T. Mustelin, G. Eng, O.H.  
627 Yilmaz, U.A. Matulonis, S.J. Skates, B.R. Rueda, R. Drapkin, S.J. Klempner, V.  
628 Deshpande, D.T. Ting, M.P. Rout, J. LaCava, D.R. Walt, K.H. Burns,  
629 Ultrasensitive detection of circulating LINE-1 ORF1p as a specific multi-  
630 cancer biomarker, *Cancer Discov.* 13 (2023) OF1–OF16.  
631 [https://doi.org/10.1158/2159-8290.CD-23-](https://doi.org/10.1158/2159-8290.CD-23-0313/729035/AM/ULTRASENSITIVE-DETECTION-OF-CIRCULATING-LINE-1)  
632 [0313/729035/AM/ULTRASENSITIVE-DETECTION-OF-CIRCULATING-LINE-](https://doi.org/10.1158/2159-8290.CD-23-0313/729035/AM/ULTRASENSITIVE-DETECTION-OF-CIRCULATING-LINE-1)  
633 [1](https://doi.org/10.1158/2159-8290.CD-23-0313/729035/AM/ULTRASENSITIVE-DETECTION-OF-CIRCULATING-LINE-1).
- 634 [23] J.K. Baillie, M.W. Barnett, K.R. Upton, D.J. Gerhardt, T.A. Richmond, F. De

- 635 Sapio, P.M. Brennan, P. Rizzu, S. Smith, M. Fell, R.T. Talbot, S. Gustincich, T.C.  
636 Freeman, J.S. Mattick, D.A. Hume, P. Heutink, P. Carninci, J.A. Jeddloh, G.J.  
637 Faulkner, Somatic retrotransposition alters the genetic landscape of the  
638 human brain, *Nature* 479 (2011) 534–537.  
639 <https://doi.org/10.1038/nature10531>.
- 640 [24] C. Chu, R. Borges-Monroy, V. V. Viswanadham, S. Lee, H. Li, E.A. Lee, P.J. Park,  
641 Comprehensive identification of transposable element insertions using  
642 multiple sequencing technologies, *Nat. Commun.* 12 (2021).  
643 <https://doi.org/10.1038/s41467-021-24041-8>.
- 644 [25] E.J. Gardner, V.K. Lam, D.N. Harris, N.T. Chuang, E.C. Scott, W. Stephen  
645 Pittard, R.E. Mills, S.E. Devine, The mobile element locator tool (MELT):  
646 Population-scale mobile element discovery and biology, *Genome Res.* 27  
647 (2017) 1916–1929. <https://doi.org/10.1101/GR.218032.116/-/DC1>.
- 648 [26] D.T. jwa. Thung, J. de Ligt, L.E.M. Vissers, M. Steehouwer, M. Kroon, P. de  
649 Vries, E.P. Slagboom, K. Ye, J.A. Veltman, J.Y. Hehir-Kwa, Mobster: accurate  
650 detection of mobile element insertions in next generation sequencing data,  
651 *Genome Biol.* 15 (2014) 488. [https://doi.org/10.1186/S13059-014-0488-](https://doi.org/10.1186/S13059-014-0488-X/FIGURES/3)  
652 [X/FIGURES/3](https://doi.org/10.1186/S13059-014-0488-X/FIGURES/3).
- 653 [27] W. Zhou, S.B. Emery, D.A. Flasch, Y. Wang, K.Y. Kwan, J.M. Kidd, J. V. Moran,  
654 R.E. Mills, Identification and characterization of occult human-specific LINE-  
655 1 insertions using long-read sequencing technology, *Nucleic Acids Res.* 48  
656 (2020) 1146–1163. <https://doi.org/10.1093/NAR/GKZ1173>.
- 657 [28] A.C. Katz-Summercorn, S. Jammula, A. Frangou, I. Peneva, M. O'Donovan, M.  
658 Tripathi, S. Malhotra, M. di Pietro, S. Abbas, G. Devonshire, W. Januszewicz, A.  
659 Blasko, K. Nowicki-Osuch, S. MacRae, A. Northrop, A.M. Redmond, D.C.

- 660 Wedge, R.C. Fitzgerald, Multi-omic cross-sectional cohort study of pre-  
661 malignant Barrett's esophagus reveals early structural variation and  
662 retrotransposon activity, *Nat. Commun.* 13 (2022).  
663 <https://doi.org/10.1038/s41467-022-28237-4>.
- 664 [29] A.W. Caliri, A. Caceres, S. Tommasi, A. Besaratinia, Hypomethylation of LINE-  
665 1 repeat elements and global loss of DNA hydroxymethylation in vapers and  
666 smokers, *Epigenetics* 15 (2020) 816–829.  
667 <https://doi.org/10.1080/15592294.2020.1724401>.
- 668 [30] H. Shigaki, Y. Baba, M. Watanabe, S. Iwagami, K. Miyake, T. Ishimoto, M.  
669 Iwatsuki, H. Baba, LINE-1 hypomethylation in noncancerous esophageal  
670 mucosae is associated with smoking history, *Ann. Surg. Oncol.* 19 (2012)  
671 4238–4243. <https://doi.org/10.1245/s10434-012-2488-y>.
- 672 [31] P. Vineis, M. Alavanja, P. Buffler, E. Fontham, S. Franceschi, Y.T. Gao, P.C.  
673 Gupta, A. Hackshaw, E. Matos, J. Samet, F. Sitas, J. Smith, L. Stayner, K. Straif,  
674 M.J. Thun, H.E. Wichmann, A.H. Wu, D. Zaridze, R. Peto, R. Doll, Tobacco and  
675 cancer: recent epidemiological evidence, *J. Natl. Cancer Inst.* 96 (2004) 99–  
676 106. <https://doi.org/10.1093/JNCI/DJH014>.
- 677 [32] K. Hur, P. Cejas, J. Feliu, J. Moreno-Rubio, E. Burgos, C.R. Boland, A. Goel,  
678 Hypomethylation of long interspersed nuclear element-1 (LINE-1) leads to  
679 activation of proto-oncogenes in human colorectal cancer metastasis, *Gut* 63  
680 (2014) 635–646. <https://doi.org/10.1136/GUTJNL-2012-304219>.
- 681 [33] M. Casarotto, V. Lupato, G. Giurato, R. Guerrieri, S. Sulfaro, A. Salvati, E.  
682 D'Angelo, C. Furlan, A. Menegaldo, L. Baboci, B. Montico, I. Turturici, R.  
683 Dolcetti, S. Romeo, V. Baggio, S. Corrado, G. Businello, M. Guido, A. Weisz, V.  
684 Giacomarra, G. Franchin, A. Steffan, L. Sigalotti, E. Vaccher, P. Boscolo-Rizzo,

- 685 P. Jerry, G. Fanetti, E. Fratta, LINE-1 hypomethylation is associated with poor  
686 outcomes in locoregionally advanced oropharyngeal cancer, Clin.  
687 Epigenetics 14 (2022). <https://doi.org/10.1186/s13148-022-01386-5>.
- 688 [34] C. Furlan, J. Polese, L. Barzan, G. Franchin, S. Sulfaro, S. Romeo, F. Colizzi, A.  
689 Rizzo, V. Baggio, V. Giacomarra, A.P. Dei Tos, P. Boscolo-Rizzo, E. Vaccher, R.  
690 Dolcetti, L. Sigalotti, E. Fratta, Prognostic significance of LINE-1  
691 hypomethylation in oropharyngeal squamous cell carcinoma, Clin.  
692 Epigenetics 9 (2017). [https://doi.org/10.1186/S13148-017-0357-](https://doi.org/10.1186/S13148-017-0357-Z/FIGURES/4)  
693 [Z/FIGURES/4](https://doi.org/10.1186/S13148-017-0357-Z/FIGURES/4).
- 694 [35] K. Misawa, S. Yamada, M. Mima, T. Nakagawa, T. Kurokawa, A. Imai, D.  
695 Mochizuki, D. Shinmura, T. Yamada, J. Kita, R. Ishikawa, Y. Yamaguchi, Y.  
696 Misawa, T. Kanazawa, H. Kawasaki, H. Mineta, Long interspersed nuclear  
697 element 1 hypomethylation has novel prognostic value and potential utility  
698 in liquid biopsy for oral cavity cancer, Biomark. Res. 8 (2020) 1–10.  
699 <https://doi.org/10.1186/S40364-020-00235-Y/FIGURES/6>.
- 700 [36] A. Benard, C.J.H. Van De Velde, L. Lessard, H. Putter, L. Takeshima, P.J.K.  
701 Kuppen, D.S.B. Hoon, Epigenetic status of LINE-1 predicts clinical outcome in  
702 early-stage rectal cancer, Br. J. Cancer 109 (2013) 3073–3083.  
703 <https://doi.org/10.1038/bjc.2013.654>.
- 704 [37] E.J. Kim, W.C. Chung, D.B. Kim, Y.J. Kim, J.M. Lee, J.H. Jung, Y.K. Lee, Long  
705 interspersed nuclear element (LINE)-1 methylation level as a molecular  
706 marker of early gastric cancer, Dig. Liver Dis. 48 (2016) 1093–1097.  
707 <https://doi.org/10.1016/j.dld.2016.06.002>.
- 708 [38] E. Sunami, M. de Maat, A. Vu, R.R. Turner, D.S.B. Hoon, LINE-1  
709 Hypomethylation During Primary Colon Cancer Progression, PLoS One 6

- 710 (2011) e18884. <https://doi.org/10.1371/JOURNAL.PONE.0018884>.
- 711 [39] J.P. Foy, C.R. Pickering, V.A. Papadimitrakopoulou, J. Jelinek, S.H. Lin, W.N.  
712 William, M.J. Frederick, J. Wang, W. Lang, L. Feng, L. Zhang, E.S. Kim, Y.H. Fan,  
713 W.K. Hong, A.K. El-Naggar, J.J. Lee, J.N. Myers, J.P. Issa, S.M. Lippman, L. Mao,  
714 P. Saintigny, New DNA methylation markers and global DNA  
715 hypomethylation are associated with oral cancer development, *Cancer Prev.*  
716 *Res.* 8 (2015) 1027–1035. [https://doi.org/10.1158/1940-6207.CAPR-14-](https://doi.org/10.1158/1940-6207.CAPR-14-0179)  
717 [0179](https://doi.org/10.1158/1940-6207.CAPR-14-0179).
- 718 [40] W. McKerrow, X. Wang, C. Mendez-Dorantes, P. Mita, S. Cao, M. Grivainis, L.  
719 Ding, J. LaCava, K.H. Burns, J.D. Boeke, D. Fenyő, LINE-1 expression in cancer  
720 correlates with p53 mutation, copy number alteration, and S phase  
721 checkpoint, *Proc. Natl. Acad. Sci. U. S. A.* 119 (2022).  
722 <https://doi.org/10.1073/PNAS.2115999119/-/DCSUPPLEMENTAL>.
- 723 [41] B. Tiwari, A.E. Jones, C.J. Caillet, S. Das, S.K. Royer, J.M. Abrams, P53 directly  
724 represses human LINE1 transposons, *Genes Dev.* 34 (2020) 1439–1451.  
725 <https://doi.org/10.1101/GAD.343186.120/-/DC1>.
- 726 [42] P. Mita, X. Sun, D. Fenyő, D.J. Kahler, D. Li, N. Agmon, A. Wudzinska, S.  
727 Keegan, J.S. Bader, C. Yun, J.D. Boeke, BRCA1 and S phase DNA repair  
728 pathways restrict LINE-1 retrotransposition in human cells, *Nat. Struct. Mol.*  
729 *Biol.* 27 (2020) 179–191. <https://doi.org/10.1038/S41594-020-0374-Z>.
- 730 [43] N. Rodić, R. Sharma, R. Sharma, J. Zampella, L. Dai, M.S. Taylor, R.H. Hruban,  
731 C.A. Iacobuzio-Donahue, A. Maitra, M.S. Torbenson, M. Goggins, I.M. Shih, A.S.  
732 Duffield, E.A. Montgomery, E. Gabrielson, G.J. Netto, T.L. Lotan, A.M. De  
733 Marzo, W. Westra, Z.A. Binder, B.A. Orr, G.L. Gallia, C.G. Eberhart, J.D. Boeke,  
734 C.R. Harris, K.H. Burns, Long interspersed element-1 protein expression is a

- 735 hallmark of many human cancers, *Am. J. Pathol.* 184 (2014) 1280–1286.  
736 <https://doi.org/10.1016/j.ajpath.2014.01.007>.
- 737 [44] D. Mangoni, A. Simi, P. Lau, A. Armaos, F. Ansaloni, A. Codino, D. Damiani, L.  
738 Floreani, V. Di Carlo, D. Vozzi, F. Persichetti, C. Santoro, L. Pandolfini, G.G.  
739 Tartaglia, R. Sanges, S. Gustincich, LINE-1 regulates cortical development by  
740 acting as long non-coding RNAs, *Nat. Commun.* 14 (2023).  
741 <https://doi.org/10.1038/s41467-023-40743-7>.
- 742 [45] M. Martínez-Fernández, A. Feber, M. Dueñas, C. Segovia, C. Rubio, M.  
743 Fernandez, F. Villacampa, J. Duarte, F.F. López-Calderón, M.J. Gómez-  
744 Rodriguez, D. Castellano, J.L. Rodriguez-Peralto, F. De La Rosa, S. Beck, J.M.  
745 Paramio, Analysis of the polycomb-related lncRNAs HOTAIR and ANRIL in  
746 bladder cancer, *Clin. Epigenetics* 7 (2015). [https://doi.org/10.1186/s13148-](https://doi.org/10.1186/s13148-015-0141-x)  
747 [015-0141-x](https://doi.org/10.1186/s13148-015-0141-x).
- 748 [46] C.A. Ishak, A.E. Marshall, D.T. Passos, C.R. White, J. Seung, M.J. Cecchini, S.  
749 Ferwati, W.A. Macdonald, J. Christopher, I.D. Welch, S.M. Rubin, M.R.W.  
750 Mann, F.A. Dick, An RB-EZH2 Complex Mediates Silencing of Repetitive DNA  
751 Sequences, 64 (2017) 1074–1087.  
752 <https://doi.org/10.1016/j.molcel.2016.10.021.An>.
- 753 [47] P. V. Angadi, J.K. Savitha, S.S. Rao, R.Y. Sivaranjini, Oral field cancerization:  
754 Current evidence and future perspectives, *Oral Maxillofac. Surg.* 16 (2012)  
755 171–180. <https://doi.org/10.1007/S10006-012-0317-X/TABLES/1>.
- 756 [48] I. Martincorena, A. Roshan, M. Gerstung, P. Ellis, P. Van Loo, S. McLaren, D.C.  
757 Wedge, A. Fullam, L.B. Alexandrov, J.M. Tubio, L. Stebbings, A. Menzies, S.  
758 Widaa, M.R. Stratton, P.H. Jones, P.J. Campbell, High burden and pervasive  
759 positive selection of somatic mutations in normal human skin, *Science*. 348



- 760 (2015) 880–886.
- 761 [https://doi.org/10.1126/SCIENCE.AAA6806/SUPPL\\_FILE/AAA6806-](https://doi.org/10.1126/SCIENCE.AAA6806/SUPPL_FILE/AAA6806-)
- 762 [MARTINCORENA-SM.PDF](https://doi.org/10.1126/SCIENCE.AAA6806/SUPPL_FILE/AAA6806-MARTINCORENA-SM.PDF).
- 763 [49] K. Yoshida, K.H.C. Gowers, H. Lee-Six, D.P. Chandrasekharan, T. Coorens, E.F.
- 764 Maughan, K. Beal, A. Menzies, F.R. Millar, E. Anderson, S.E. Clarke, A.
- 765 Pennycook, R.M. Thakrar, C.R. Butler, N. Kakiuchi, T. Hirano, R.E. Hynds, M.R.
- 766 Stratton, I. Martincorena, S.M. Janes, P.J. Campbell, Tobacco smoking and
- 767 somatic mutations in human bronchial epithelium, *Nat.* 2020 5787794 578
- 768 (2020) 266–272. <https://doi.org/10.1038/s41586-020-1961-1>.
- 769 [50] T.G. Paulson, P.C. Galipeau, K.M. Oman, C.A. Sanchez, M.K. Kuhner, L.P. Smith,
- 770 K. Hadi, M. Shah, K. Arora, J. Shelton, M. Johnson, A. Corvelo, C.C. Maley, X.
- 771 Yao, R. Sanghvi, E. Venturini, A.K. Emde, B. Hubert, M. Imielinski, N. Robine,
- 772 B.J. Reid, X. Li, Somatic whole genome dynamics of precancer in Barrett’s
- 773 esophagus reveals features associated with disease progression, *Nat.*
- 774 *Commun.* 13 (2022). <https://doi.org/10.1038/s41467-022-29767-7>.
- 775 [51] I. Martincorena, J.C. Fowler, A. Wabik, A.R.J. Lawson, F. Abascal, M.W.J. Hall,
- 776 A. Cagan, K. Murai, K. Mahbubani, M.R. Stratton, R.C. Fitzgerald, P.A.
- 777 Handford, P.J. Campbell, K. Saeb-Parsy, P.H. Jones, Somatic mutant clones
- 778 colonize the human esophagus with age, *Science.* 362 (2018) 911–917.
- 779 <https://doi.org/10.1126/science.aau3879>.
- 780 [52] A.R.J. Lawson, F. Abascal, T.H.H. Coorens, Y. Hooks, L. O’Neill, C. Latimer, K.
- 781 Raine, M.A. Sanders, A.Y. Warren, K.T.A. Mahbubani, B. Bareham, T.M. Butler,
- 782 L.M.R. Harvey, A. Cagan, A. Menzies, L. Moore, A.J. Colquhoun, W. Turner, B.
- 783 Thomas, V. Gnanapragasam, N. Williams, D.M. Rassl, H. Vöhringer, S.
- 784 Zumalave, J. Nangalia, J.M.C. Tubío, M. Gerstung, K. Saeb-Parsy, M.R. Stratton,

- 785 P.J. Campbell, T.J. Mitchell, I. Martincorena, Extensive heterogeneity in  
786 somatic mutation and selection in the human bladder, *Science*. 370 (2020)  
787 75–82. <https://doi.org/10.1126/science.aba8347>.
- 788 [53] C.H. Nam, J. Youk, J.Y. Kim, J. Lim, J.W. Park, S.A. Oh, H.J. Lee, J.W. Park, H.  
789 Won, Y. Lee, S.Y. Jeong, D.S. Lee, J.W. Oh, J. Han, J. Lee, H.W. Kwon, M.J. Kim,  
790 Y.S. Ju, Widespread somatic L1 retrotransposition in normal colorectal  
791 epithelium, *Nature* 617 (2023) 540–547. [https://doi.org/10.1038/s41586-](https://doi.org/10.1038/s41586-023-06046-z)  
792 [023-06046-z](https://doi.org/10.1038/s41586-023-06046-z).
- 793 [54] M. Shademan, K. Zare, M. Zahedi, H. Mosannen Mozaffari, H. Bagheri  
794 Hosseini, K. Ghaffar zadegan, L. Goshayeshi, H. Dehghani, Promoter  
795 methylation, transcription, and retrotransposition of LINE-1 in colorectal  
796 adenomas and adenocarcinomas, *Cancer Cell Int*. 20 (2020) 1–16.  
797 <https://doi.org/10.1186/S12935-020-01511-5>.
- 798
- 799

800 **FIGURE LEGENDS**

801 **Figure 1. RetroTest design and benchmarking.** **A.** RetroTest design. **B.**  
802 Scatterplot and correlation between L1 activation and orphan transductions (TD2)  
803 in the International Consortium of PanCancer (PCAWG) data. The number of L1 3'  
804 transductions measured L1 activation. **C.** Performance of RetroTest for different  
805 sequencing coverages using an artificially generated GRC37/hg19 genome with a  
806 total of 2,480 randomly distributed L1 transductions at 50% VAF. **D.** Performance  
807 of RetroTest with respect to the VAF of L1 integrations, using the artificially  
808 generated GRC37/hg19 genome with a total of 2,480 randomly distributed L1  
809 transductions at different VAFs. **E.** Performance of TraFiC with respect of the VAF  
810 of L1 integrations, using the artificially generated GRC37/hg19 genome with a  
811 total of 2,480 randomly distributed L1 transductions at different VAFs. **F.** Venn  
812 diagram of the number of L1 insertions detected by RetroTest and TraFiC in the  
813 artificial genome with a VAF of 50% for L1 insertions.

814

815 **Figure 2. L1 activation measured by RetroTest in the HNSCC cohort (n=96).** **A.**  
816 Quantification of L1 activation in HNSCC tumors as the number of orphan  
817 transduction detected by RetroTest. **B.** Boxplot of L1 activation with respect to  
818 early (T1-T2) and advanced (T3-T4) TNM stages. Differential activation p-value  
819 was derived by the Wilcoxon test. To correct coverage-related bias, L1 activation  
820 was calculated as the number of TD2 divided by its median coverage. **C.** Boxplot of  
821 L1 activation with respect to smoking status. Differential activation p-value was  
822 derived by the Wilcoxon test. To correct coverage-related bias, L1 activation was  
823 calculated as the number of TD2 divided by its median coverage. **D.** Kaplan-Meier  
824 curves for overall survival with respect to L1 activation rate at T1 stage. Patients

825 were grouped into high (above the median) and low (below the median) L1  
826 activation rate. Log-rank test was used to calculate the p-value. To correct  
827 coverage-related bias, L1 activation was calculated as the number of TD2 divided  
828 by its median coverage. **E.** Oncoplot showing the genes affected by L1 insertions  
829 and their original source elements. A total of 27 patients presented genes affected  
830 by L1 insertions from 46 different source elements.

831

832 **Figure 3. Characterization of the mutational profile of HNSCC patients by**

833 **WGS (n=19).** **A.** Oncoplot showing the genes harboring somatic mutations in  
834 HNSCC patients. The type of mutation in each gene and the L1 activation (number  
835 of L1 insertions in each patient) is shown. **B.** Boxplot of L1 activation with respect  
836 to TP53 mutation or wild-type status. To correct coverage-related bias, L1  
837 activation was calculated as the number of TD2 divided by its median coverage.  
838 Differential activation p-value was derived by the Wilcoxon test. **C.** Barplot of the  
839 Pathway enrichment analysis based on the 918 genes somatically mutated genes.  
840 Enrichment p-values were calculated with the Fisher exact test. **D.** Barplot of the  
841 transcription factor binding enrichment analysis based on the 918 genes  
842 somatically mutated genes. Enrichment p-values were calculated with the Fisher  
843 exact test.

844

845 **Figure 4. Evaluation of L1 activation in normal adjacent tissue.** **A.** Schematic

846 representation of the evaluation of the field cancerization process. **B.** Number of L1  
847 active elements in normal adjacent tissue of HNSCC patients (n=9), compared to L1  
848 activation in paired tumor tissue and PBMCs as germline control from the same  
849 patients.

850 **Table 1. Baseline characteristics of the HNSCC patients and**  
851 **clinicopathological results in the series.**

| N = 96           |                |
|------------------|----------------|
| Mean age (range) | 67.4 (38 – 90) |
| Sex              |                |
| Female           | 20             |
| Male             | 71             |
| NA               | 5              |
| TNM stage        |                |
| T1               | 16             |
| T2               | 19             |
| T3               | 18             |
| T4               | 34             |
| NA               | 9              |
| Exitus           |                |
| No               | 50             |
| Yes              | 38             |
| NA               | 8              |
| Alcohol          |                |
| Drinker          | 61             |
| Non-drinker      | 24             |
| NA               | 11             |
| Smoking habits   |                |
| Smoker           | 64             |

Non-smoker 22

NA 10

---

852

853

854

855

856

857 **Table 2. Number of HNSCC patients showing L1 activation along TNM stages.**

|             | TNM stage |    |    |    |
|-------------|-----------|----|----|----|
|             | T1        | T2 | T3 | T4 |
| L1 active   | 10        | 12 | 17 | 25 |
| L1 inactive | 6         | 7  | 1  | 9  |

858

859 **ADDITIONAL FILES**

860 **Additional file 1 (pdf): Supplementary Methods:** RetroTest library and target  
861 sequencing; RetroTest method in detail; RetroTest benchmarking; Whole Genome  
862 Sequencing and determination of mutation profile; Gene pathway databases uses  
863 for enrichment analysis

864 **Additional file 2 (xls): Table S1:** RetroTest benchmarking. **Table S2:** HNSCC  
865 somatic variants. **Table S3:** Gene pathways affected by HNSCC somatic variants.  
866 **Table S4:** Transcription factors binding to genes affected by HNSCC somatic  
867 variants. **Table S5:** HNSCC NAT somatic variants

868 **Additional file 3 (pdf). Figure S1.** Kaplan-Meier curves for overall survival in  
869 HNSCC cohort with respect to (A) L1 activation status (active vs inactive) and (B)  
870 L1 activation rate (with respect to the median, being high above vs low as below  
871 the median). Log-rank test was used to calculate the p-value.

872

873

874

875

876

877

878

879

880

881

882

883



884 **FIGURES**

885 **Figure 1.**

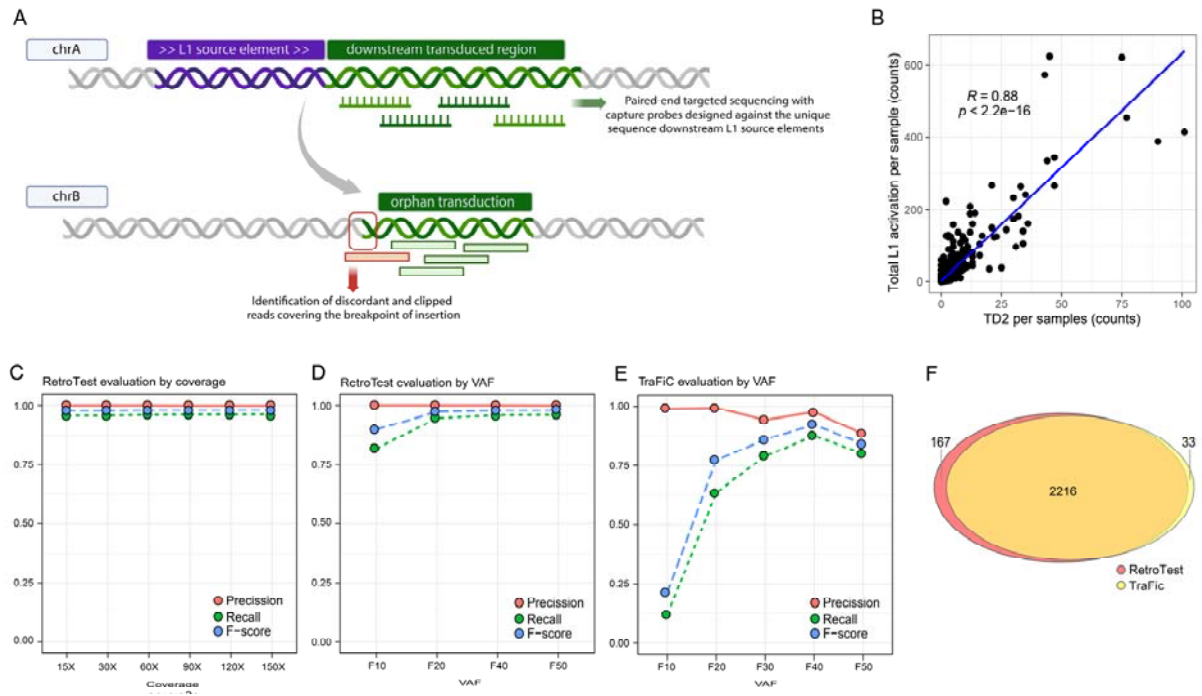

886

887

888

889

890

891

892

893

894

895

896

897

898

899

900 **Figure 2.**

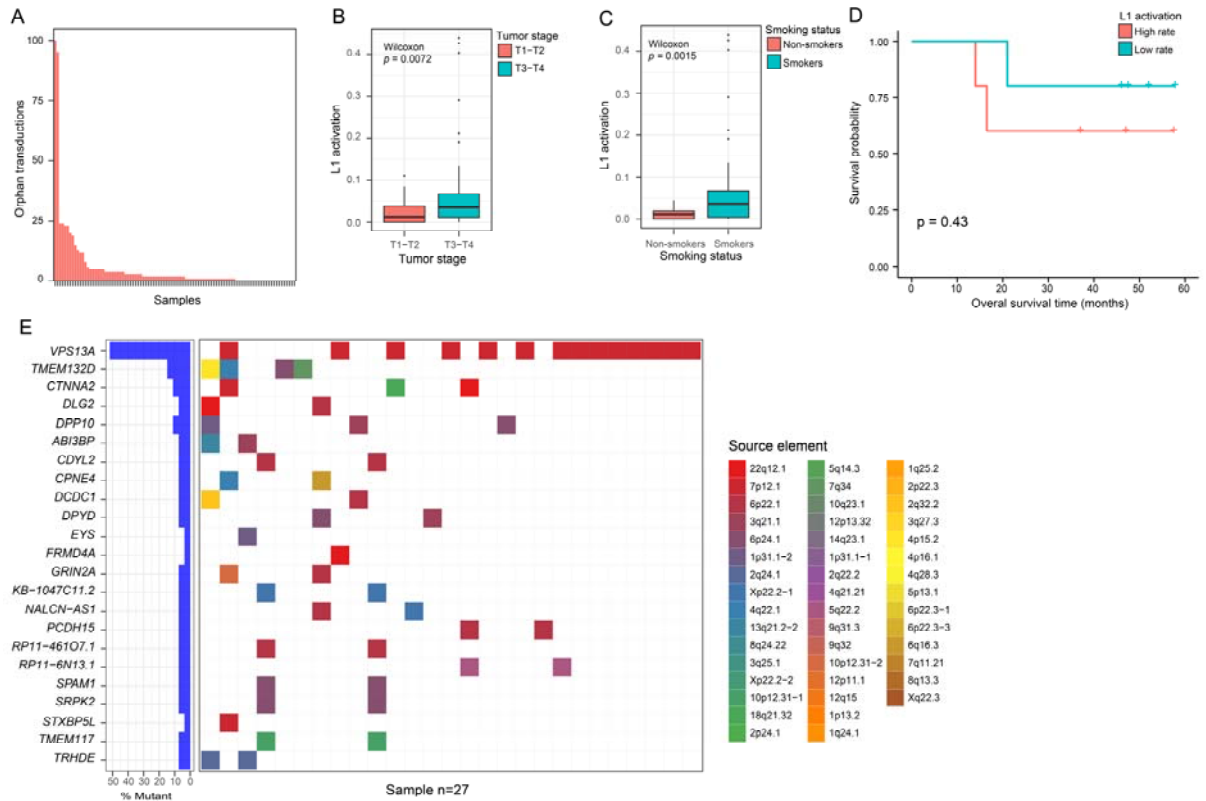

901

902

903

904

905

906

907

908

909

910

911

912

913

914 **Figure 3.**

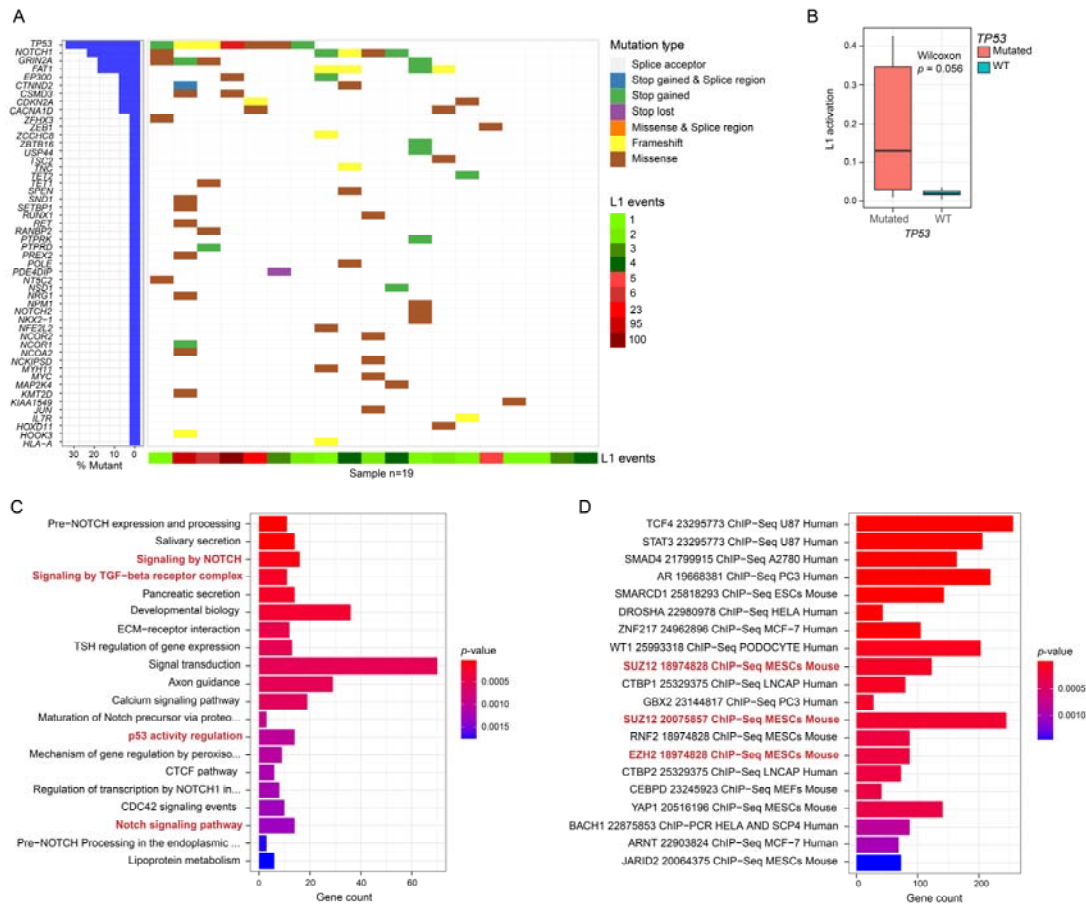

915

916

917

918

919

920

921

922

923

924

925

926 **Figure 4.**

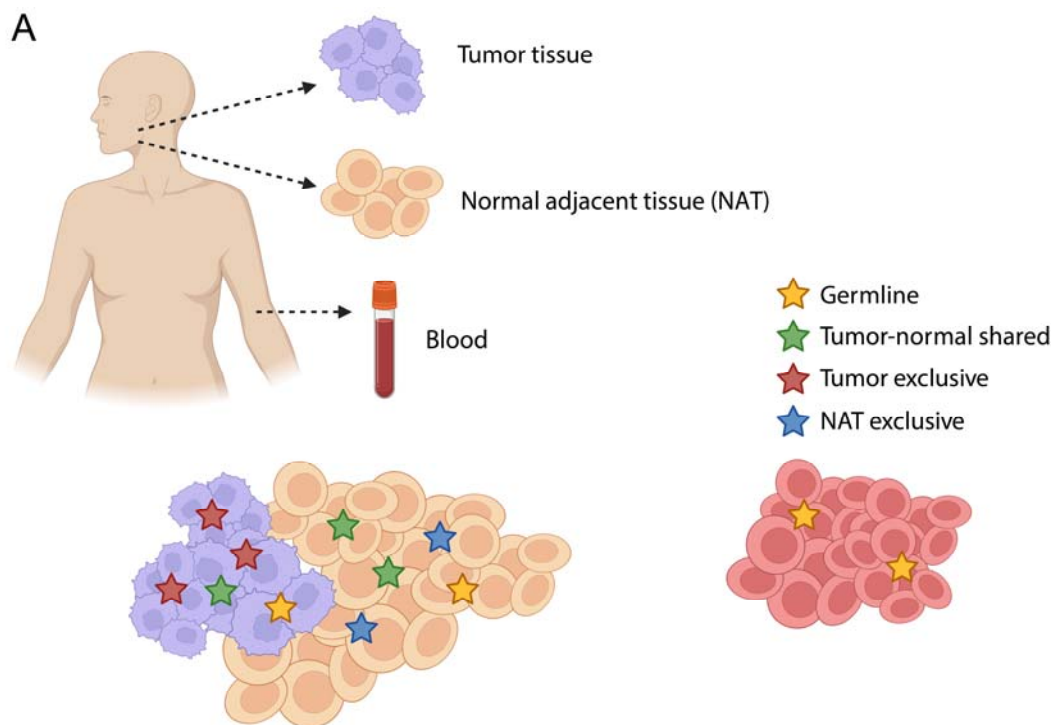

**B**

| Patient  | NAT exclusive | Tumor exclusive | Tumor-normal shared | Germline | Total |
|----------|---------------|-----------------|---------------------|----------|-------|
| HNSCC_01 | 0             | 20              | 0                   | 1        | 21    |
| HNSCC_02 | 1             | 95              | 1                   | 0        | 97    |
| HNSCC_03 | 1             | 24              | 0                   | 0        | 25    |
| HNSCC_04 | 0             | 100             | 0                   | 0        | 100   |
| HNSCC_05 | 0             | 4               | 0                   | 0        | 4     |
| HNSCC_06 | 2             | 1               | 0                   | 0        | 3     |
| HNSCC_07 | 0             | 23              | 0                   | 1        | 24    |
| HNSCC_08 | 0             | 3               | 0                   | 2        | 5     |
| HNSCC_09 | 0             | 2               | 0                   | 1        | 3     |

927

928

929

930

931

932

933

934

935

936

A

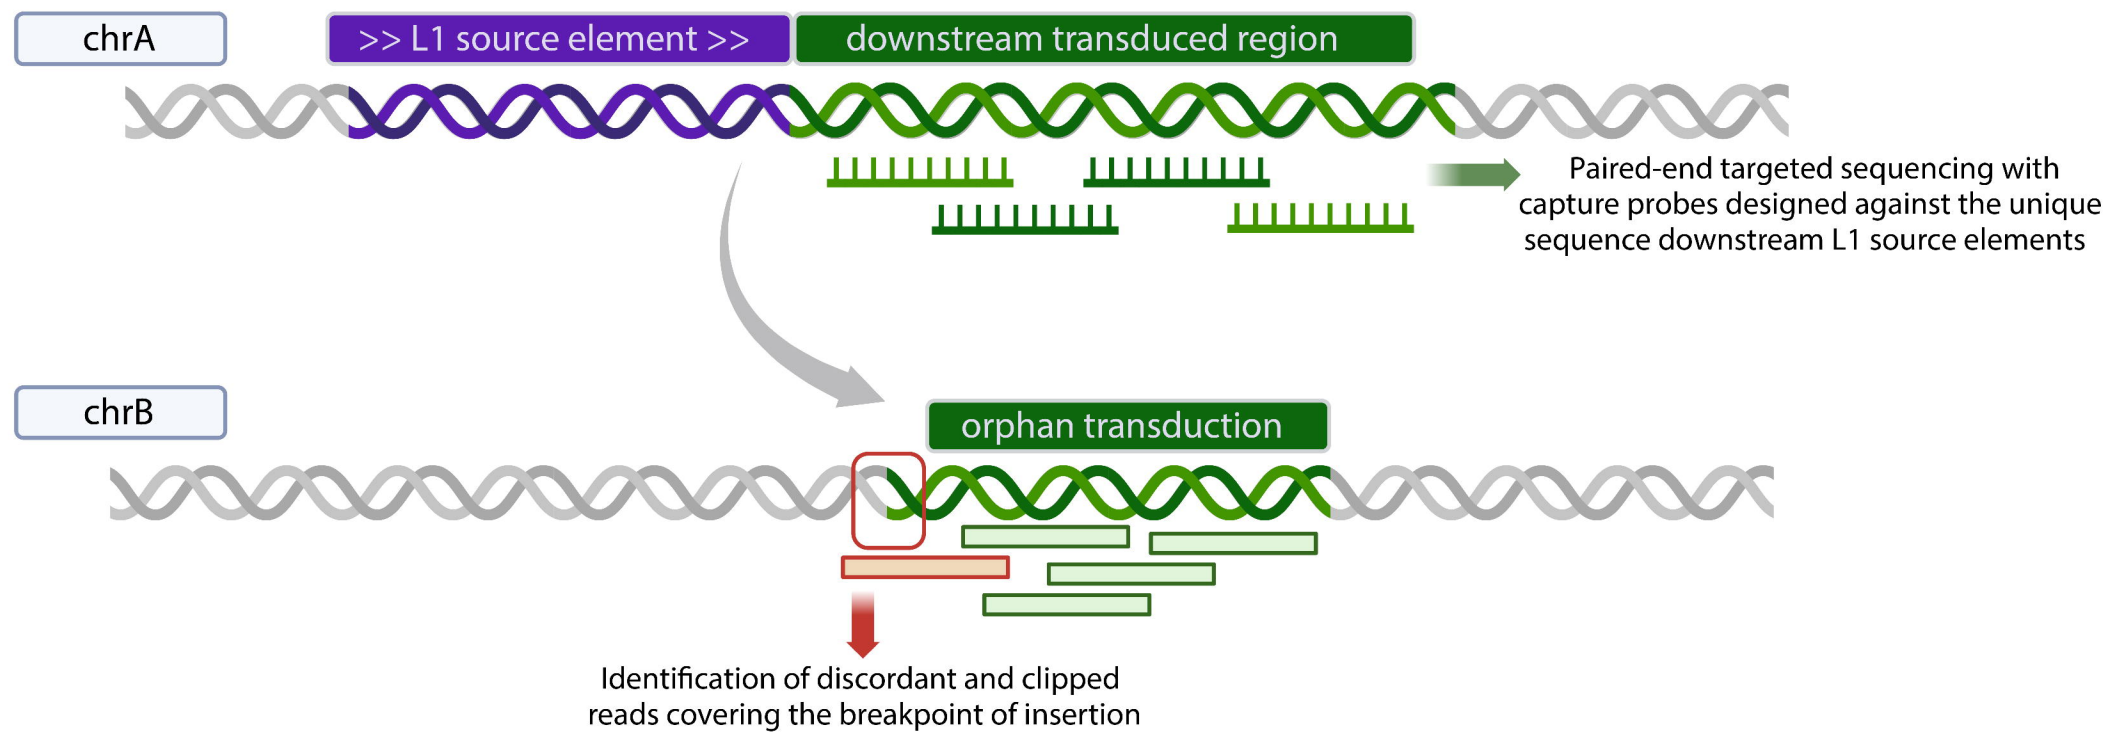

B

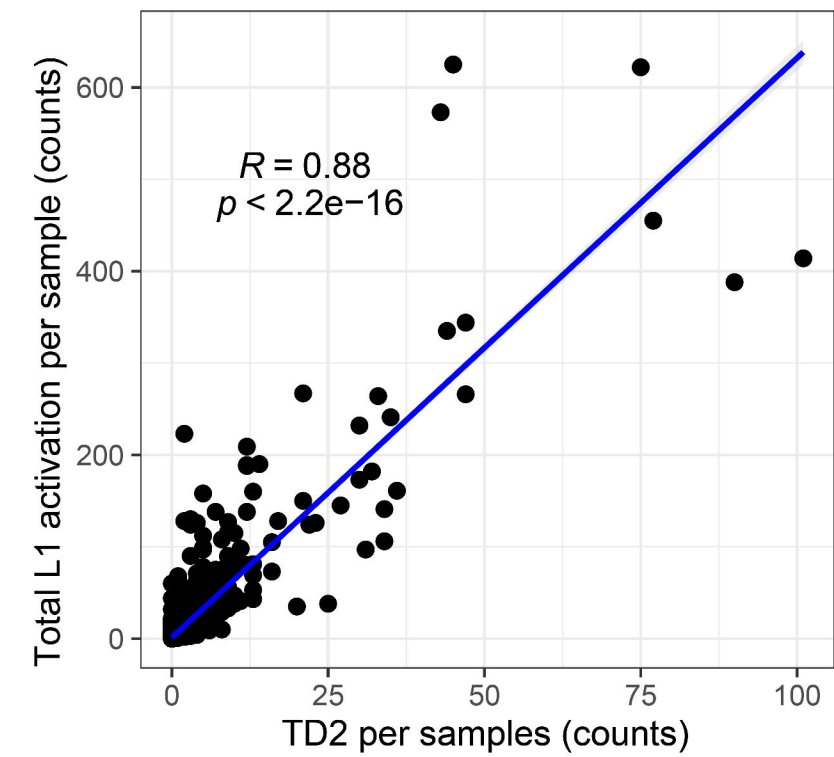

C

RetroTest evaluation by coverage

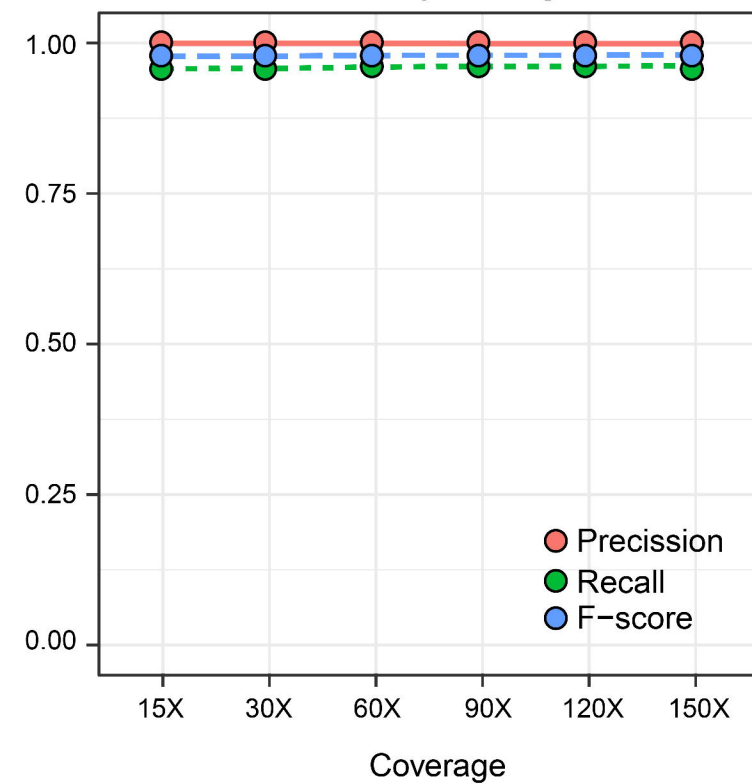

D

RetroTest evaluation by VAF

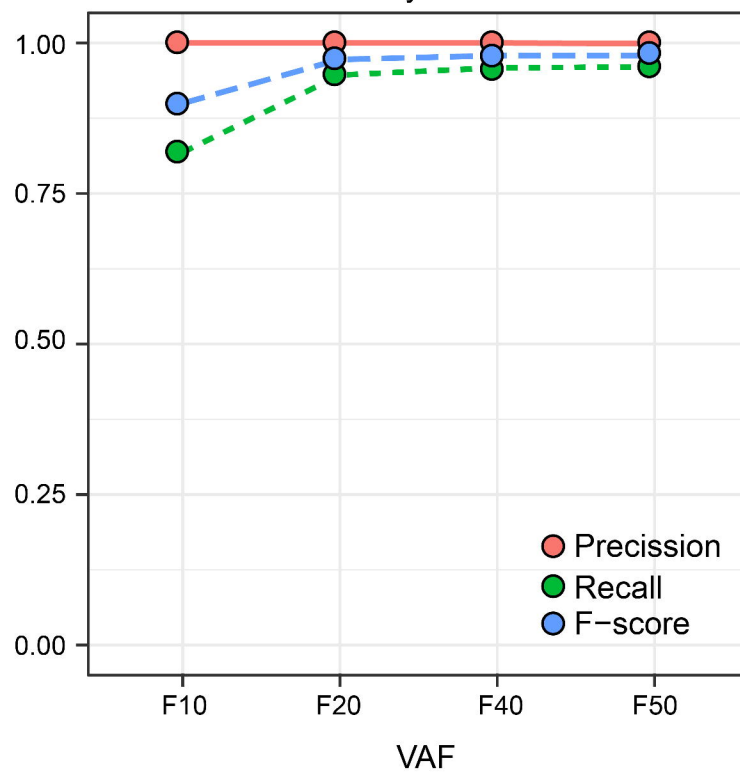

E

TraFiC evaluation by VAF

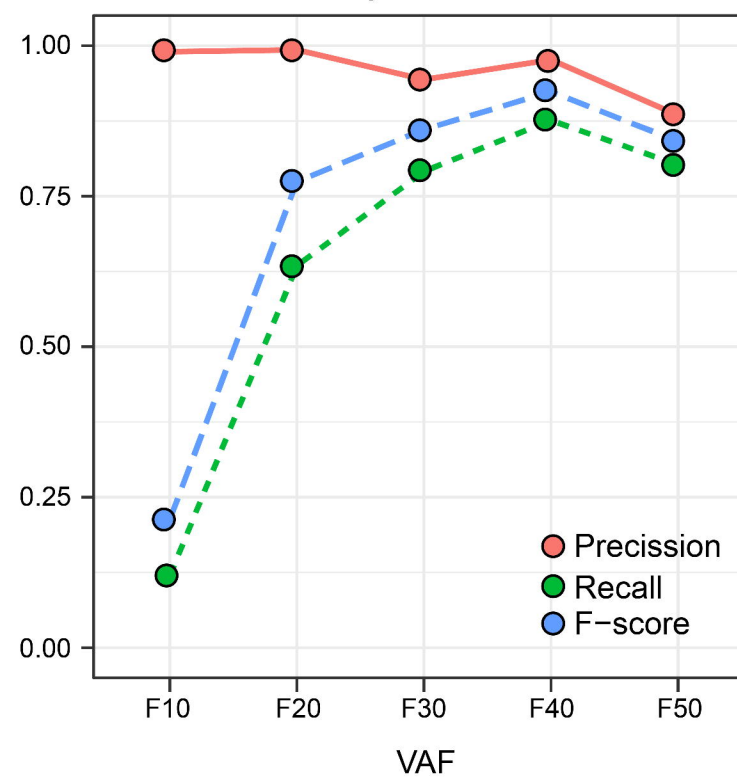

F

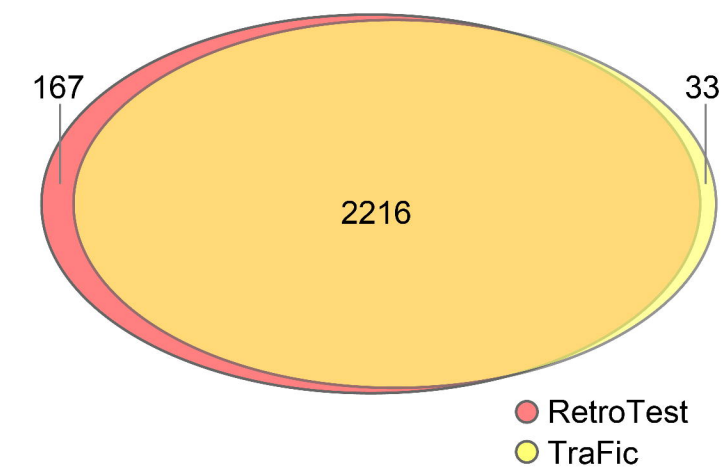

A

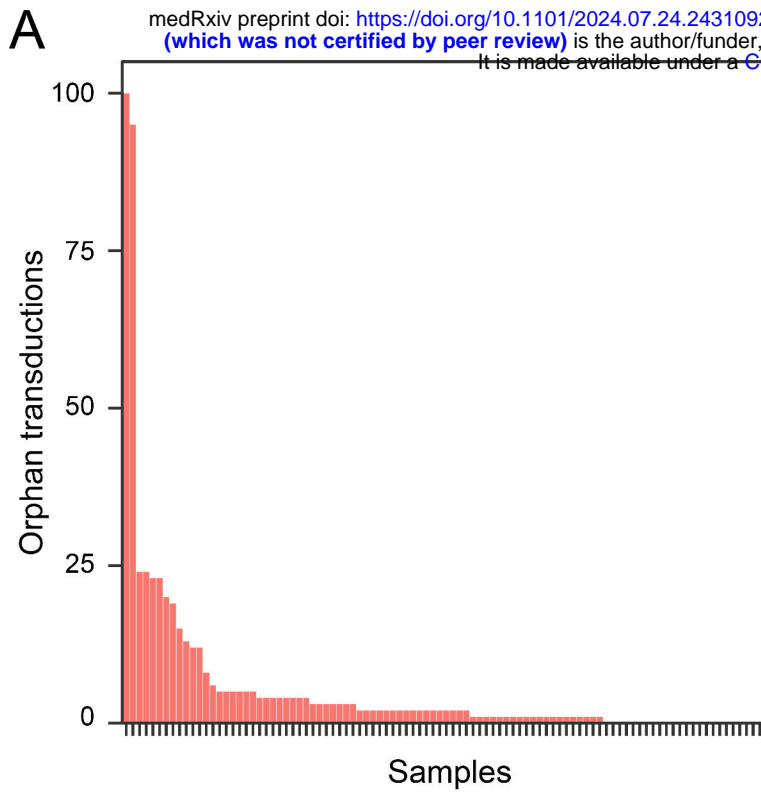

B

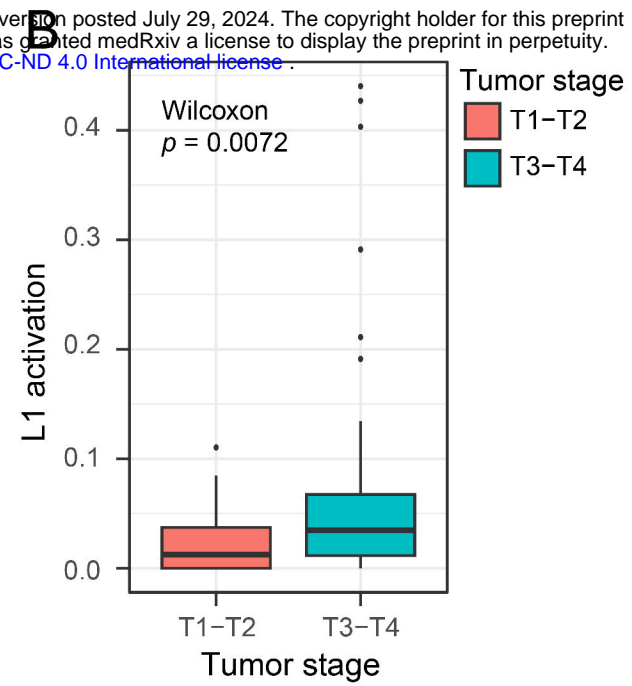

C

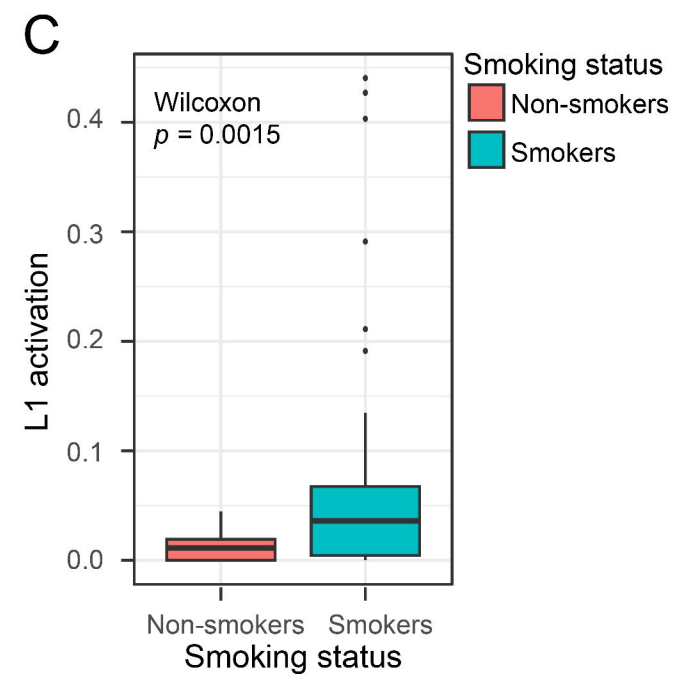

D

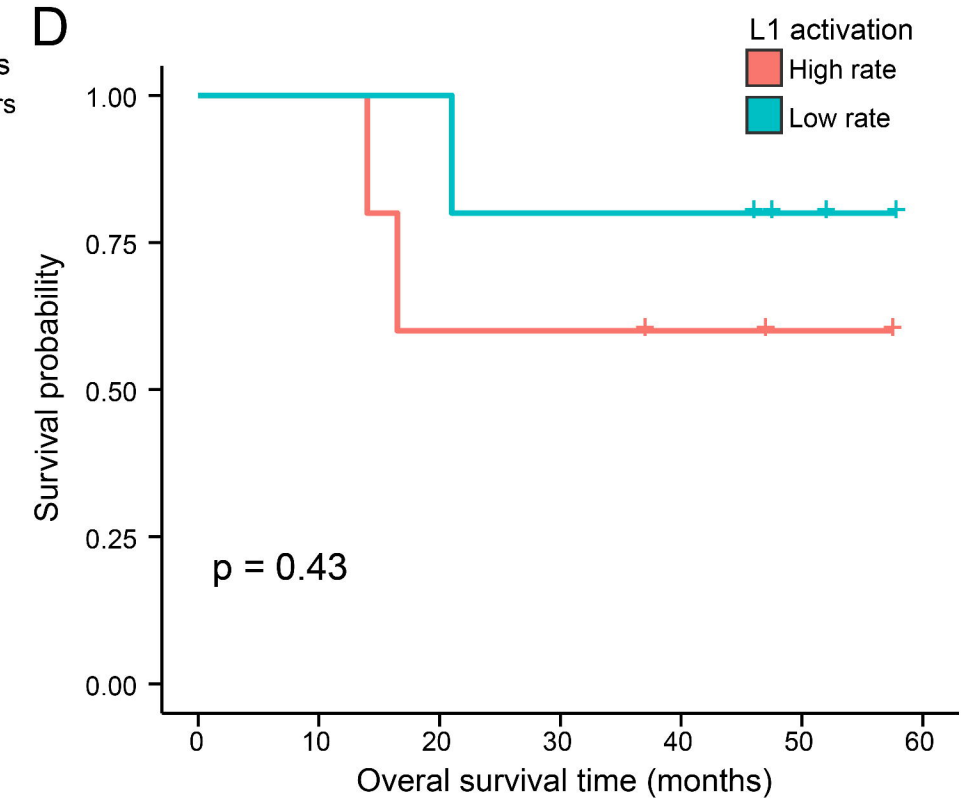

E

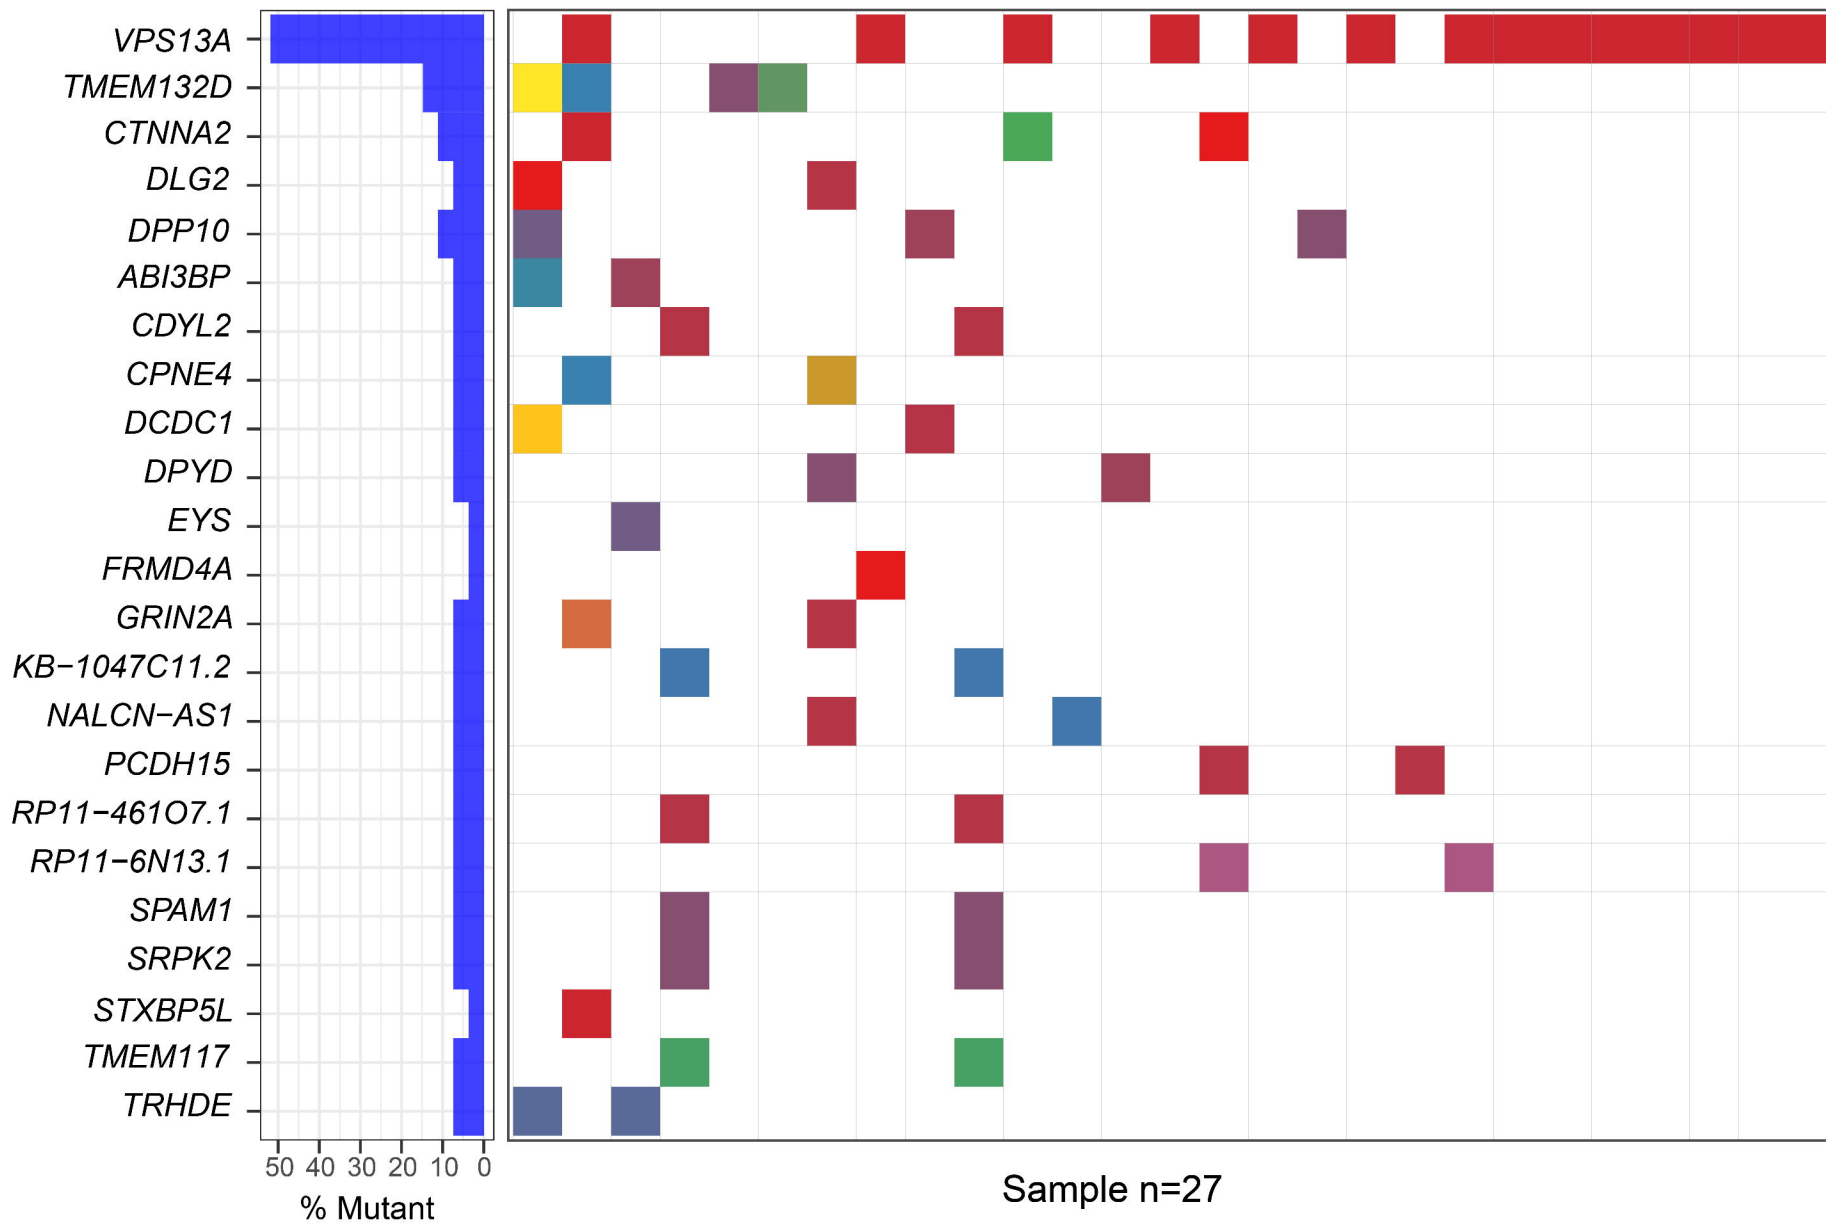

A

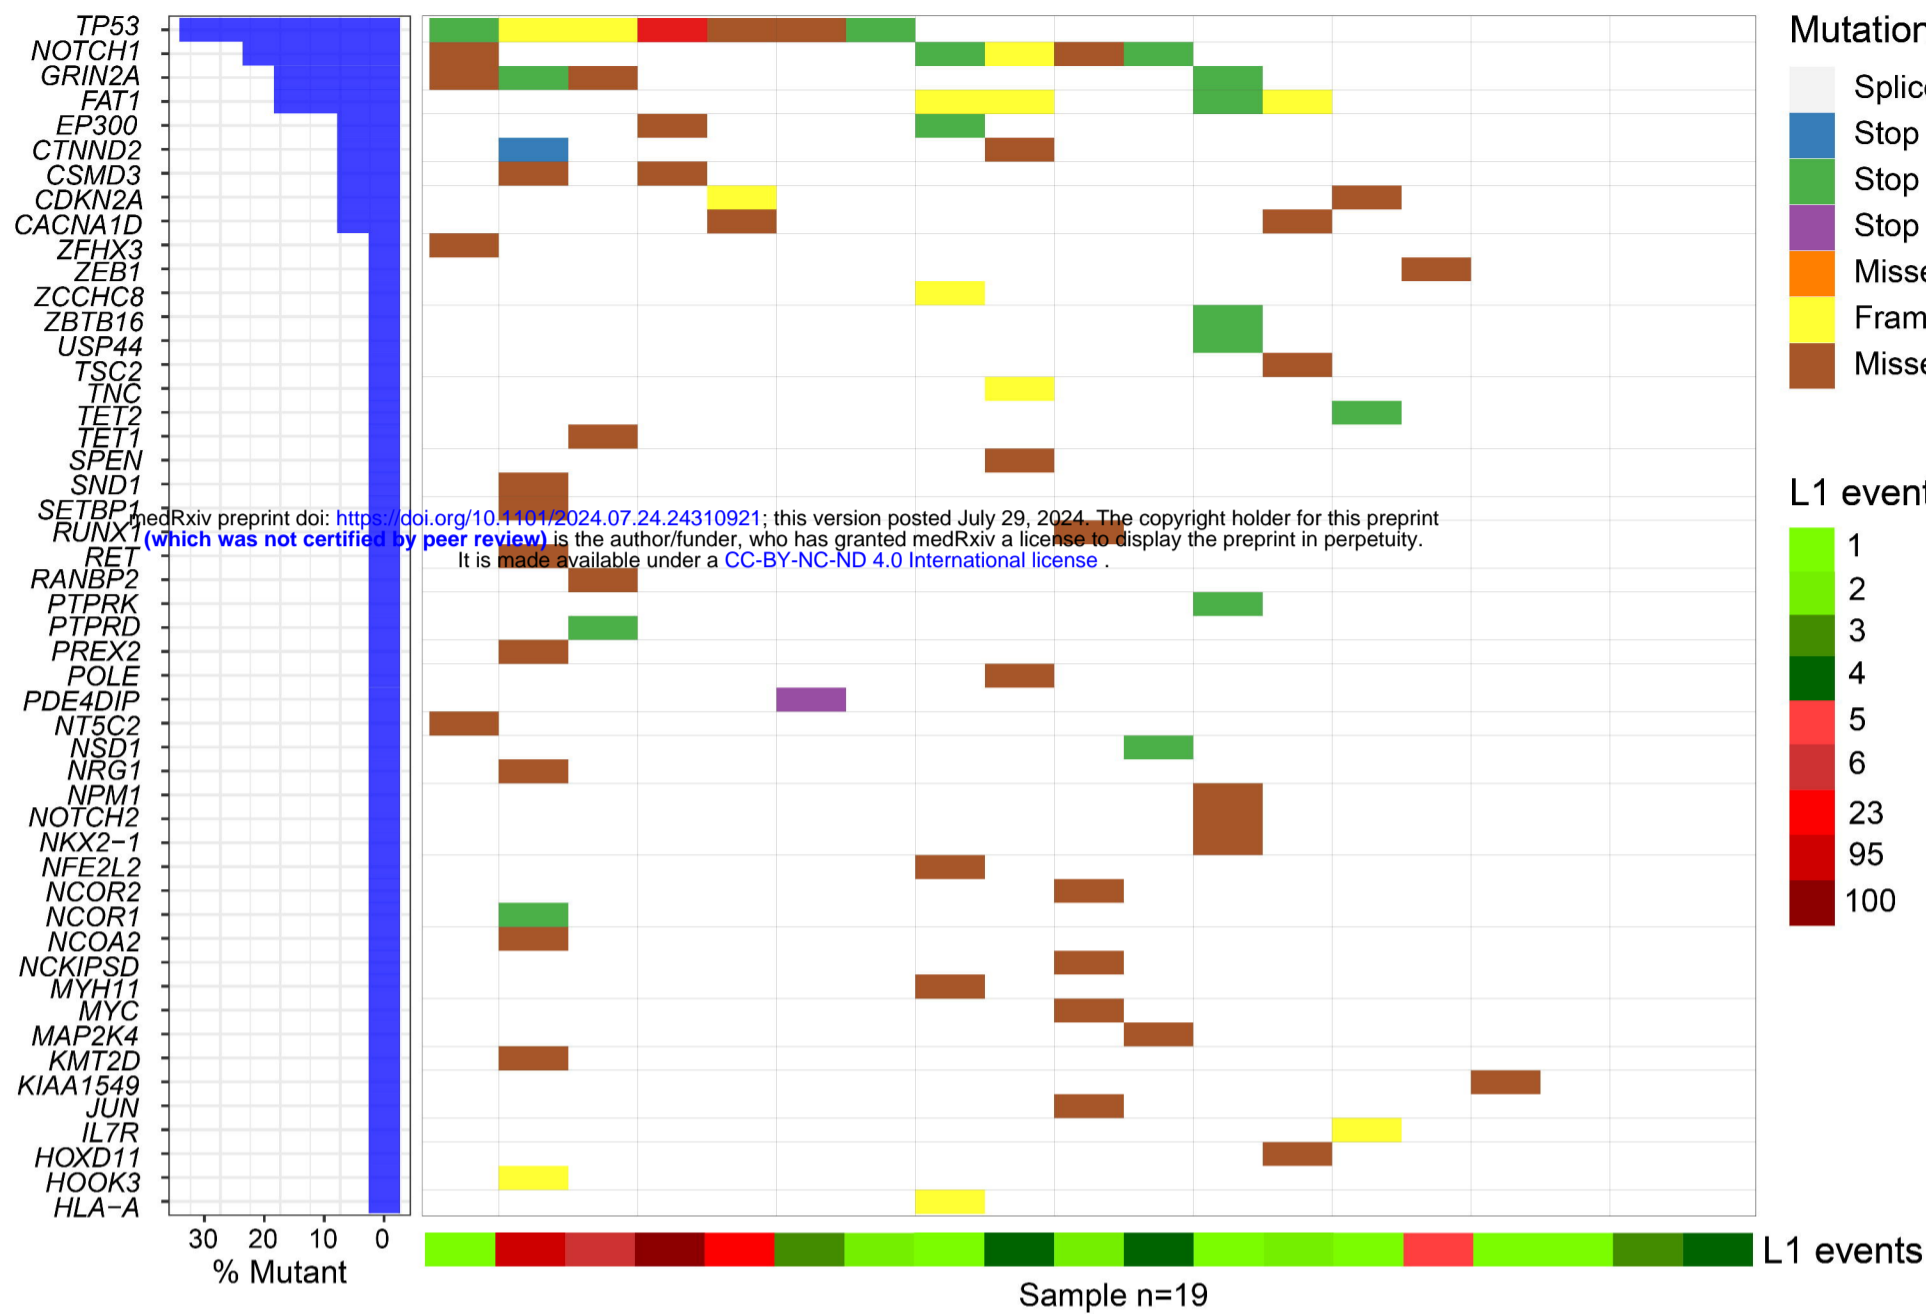

B

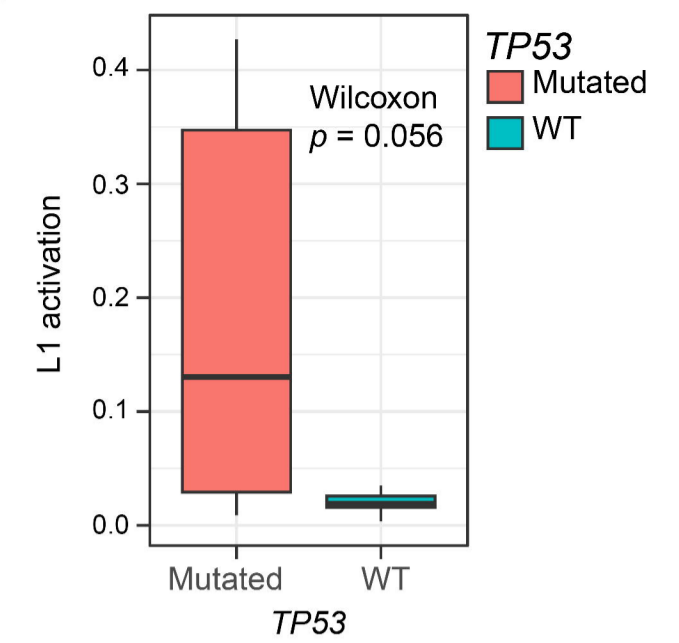

C

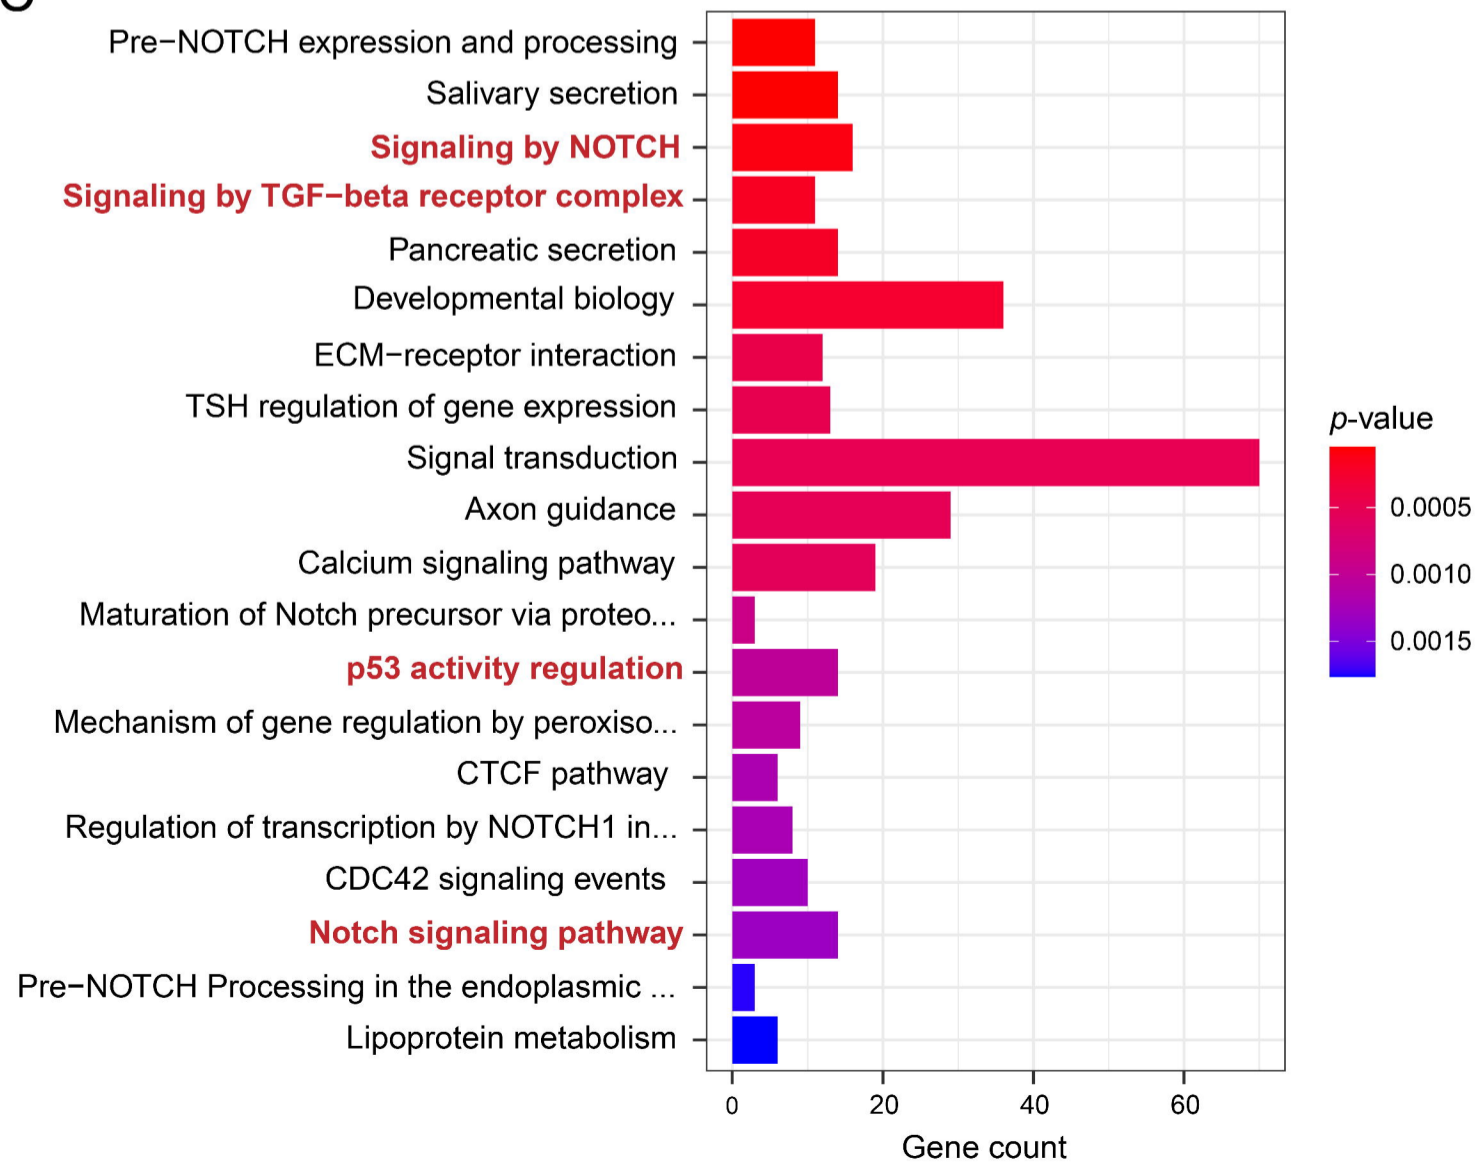

D

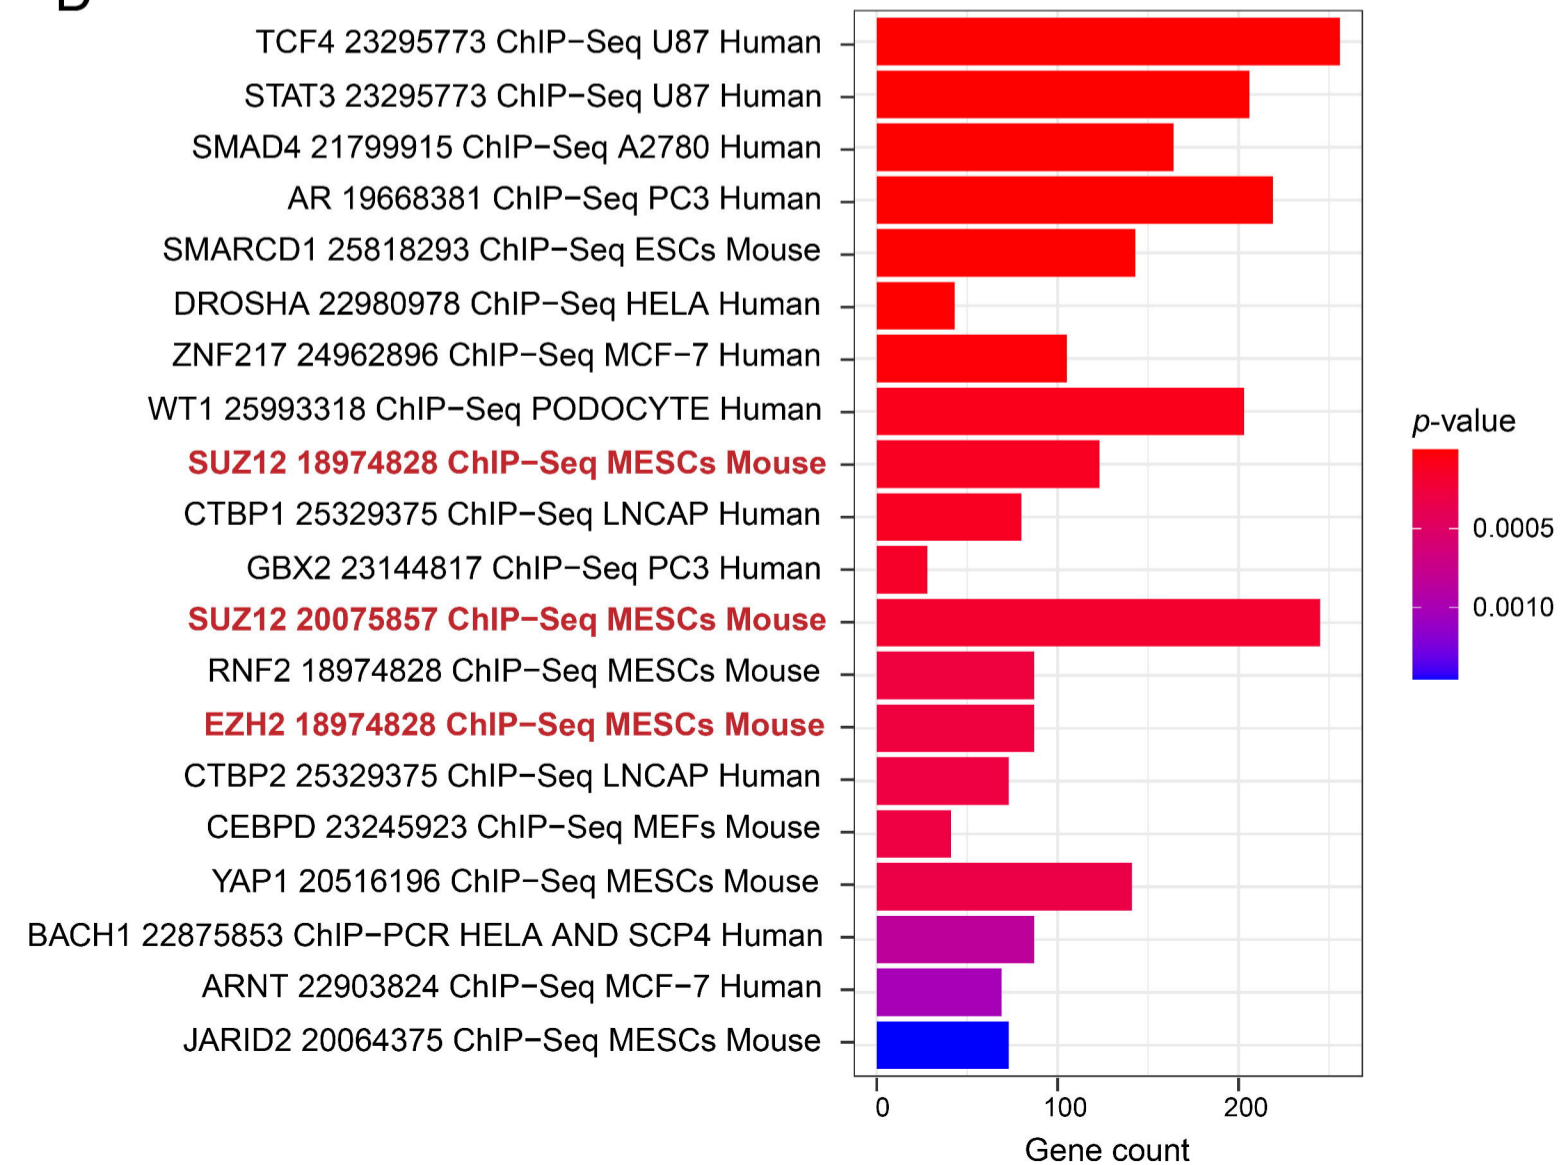

A

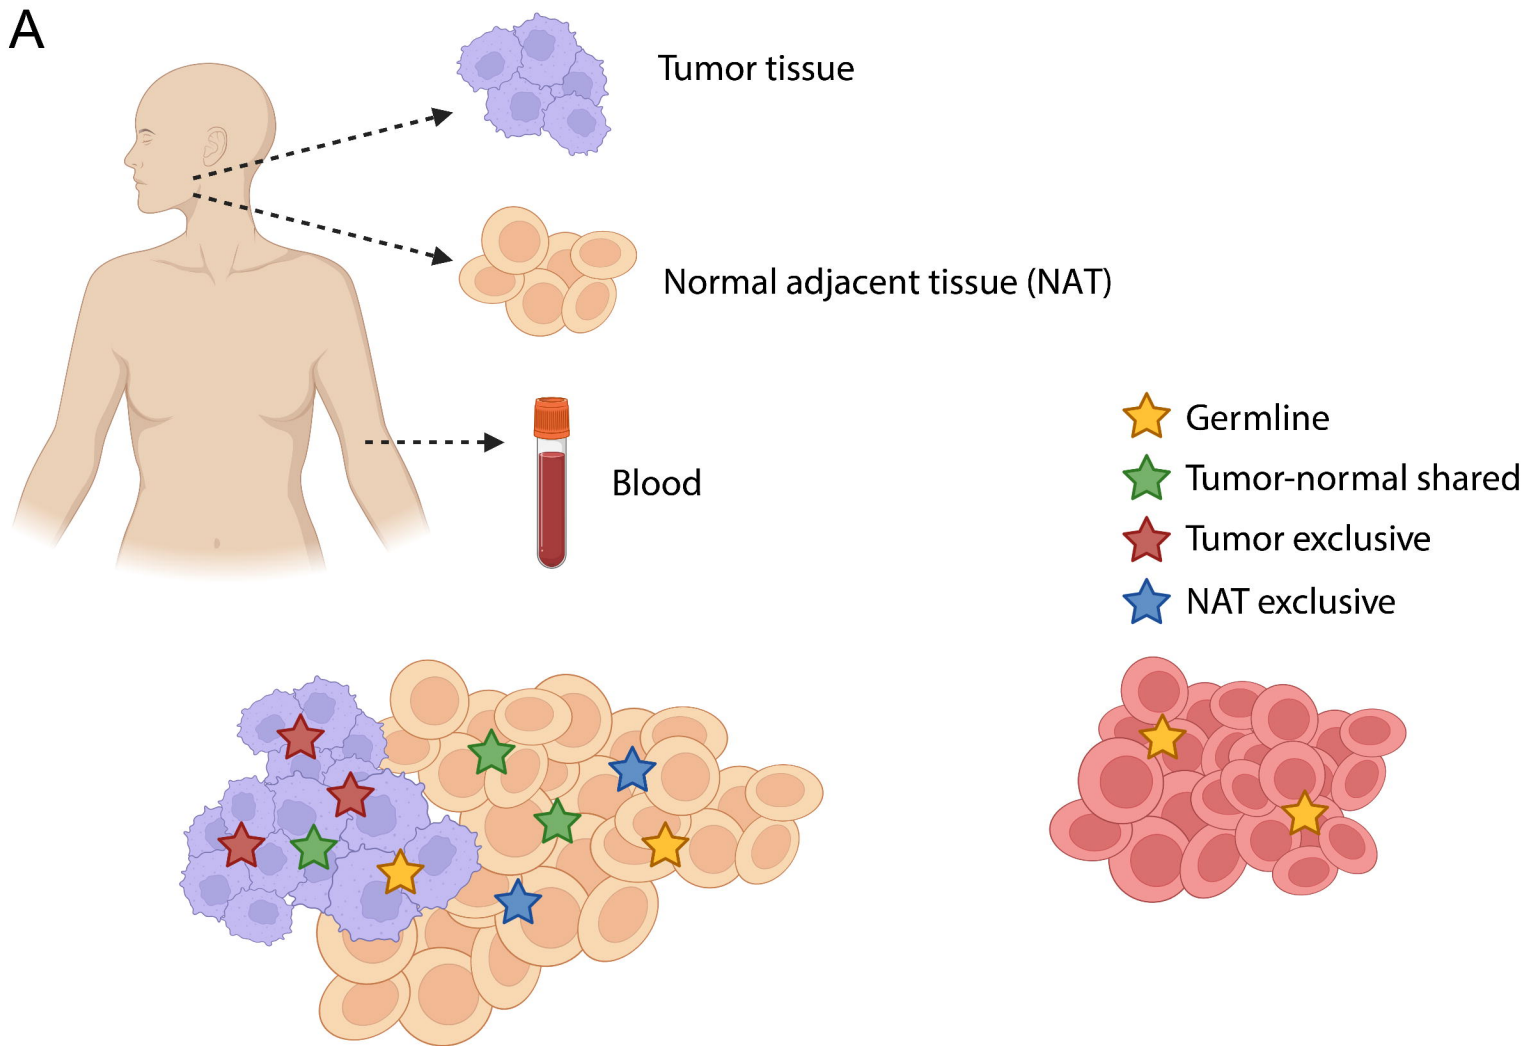

B

| Patient  | NAT exclusive | Tumor exclusive | Tumor-normal shared | Germline | Total |
|----------|---------------|-----------------|---------------------|----------|-------|
| HNSCC_01 | 0             | 20              | 0                   | 1        | 21    |
| HNSCC_02 | 1             | 95              | 1                   | 0        | 97    |
| HNSCC_03 | 1             | 24              | 0                   | 0        | 25    |
| HNSCC_04 | 0             | 100             | 0                   | 0        | 100   |
| HNSCC_05 | 0             | 4               | 0                   | 0        | 4     |
| HNSCC_06 | 2             | 1               | 0                   | 0        | 3     |
| HNSCC_07 | 0             | 23              | 0                   | 1        | 24    |
| HNSCC_08 | 0             | 3               | 0                   | 2        | 5     |
| HNSCC_09 | 0             | 2               | 0                   | 1        | 3     |
